# Supplementary material
Source: Research Square preprint supplement (doi:10.21203/rs.3.rs-8992745/v1)
Supplement: Supplementary file 1 [file 2477ffa6f562ef9c4aac3796.xlsx]

## Sheet: omics features1
name	Flatness	LeastAxisLength	MajorAxisLength	Maximum2DDiameterColumn	Maximum2DDiameterRow	Maximum2DDiameterSlice	Maximum3DDiameter	MeshVolume	MinorAxisLength	Sphericity	SurfaceArea	SurfaceVolumeRatio	VoxelVolume	X10Percentile	X90Percentile	Energy	Entropy	InterquartileRange	Kurtosis	Maximum	MeanAbsoluteDeviation	Mean	Median	Minimum	Range	RobustMeanAbsoluteDeviation	RootMeanSquared	Skewness	TotalEnergy	Uniformity	Variance	Autocorrelation	ClusterProminence	ClusterShade	ClusterTendency	Contrast	Correlation	DifferenceAverage	DifferenceEntropy	DifferenceVariance	Id	Idm	Idmn	Idn	Imc1	Imc2	InverseVariance	JointAverage	JointEnergy
A1	0.6991	83.0704	114.197	130.472	130.243	107.902	133.204	598026	86.5213	0.7447	45937.7	0.0776	602613	540.047	1079.78	383795065818.305	4.9176	309.883	2.4503	1389.68	167.573	733.749	698.717	153.119	1345.79	120.46	811.281	0.2222	392463996713.768	0.0301	38542.9	730.489	163592	1464.48	246.142	2.9564	0.9725	1.2774	2.0816	1.9323	0.5928	0.5419	0.9988	0.9785	-0.4481	0.9848	0.4571	25.5776	0.0082
A2	0.6895	41.929	57.5212	73.627	66.3368	59.8954	72.5966	93460.8	47.9063	0.7855	9764.72	0.1502	76665.6	1005.52	1453.98	134480091151.456	4.8518	201.511	4.1538	2225.11	133.649	1234.81	1235.29	490.087	1594.03	88.1248	1267.77	0.5674	120558299110.023	0.0396	27645.7	929.847	114544	1254.94	193.582	14.6276	0.8588	2.9431	3.0567	5.1873	0.3847	0.2953	0.9967	0.9599	-0.2152	0.9218	0.31	30.0936	0.0028
A3	0.7289	23.8485	34.3015	33.1989	40.0762	37.3731	42.9463	29148.4	32.2918	0.811	5464.76	0.2022	9830.9	609.532	876.702	6.89893e+08	4.14	131.727	4.3193	1208.15	96.0087	739.173	674.422	372.589	878.256	55.5826	735.505	1.035	9262371167.8677	0.0711	13173.8	270.685	27882.1	-393.108	90.9857	5.3856	0.8017	1.7673	2.4942	3.505	0.5099	0.4338	0.9947	0.9521	-0.211	0.894	0.4025	14.3899	0.0151
A4	0.5194	66.8485	129.974	154.418	130.247	108.674	160.732	154155	81.2932	0.4124	32392.8	0.2297	127419	104.238	168.99	-1.91781e+10	2.1975	42.676	2.8761	265.968	23.4428	100.653	126.838	60.7771	114.852	15.9489	103.78	0.439	3258695516.3421	0.25	-4.8181	-0.9207	517.798	153.416	-7.1801	1.1795	0.93	0.3158	0.6385	1.0012	0.9037	0.9071	0.9979	0.983	-0.6123	0.9585	0.1989	4.608	0.1743
A5	0.6553	62.7716	91.8427	104.998	102.128	84.5299	118.242	275695	67.5475	0.7777	26775.2	0.0907	279701	376.349	643.599	84515772676.5703	3.927	103.965	7.7319	1308.88	71.9783	486.905	517.788	68.8092	1314.15	47.0569	539.414	1.6106	87615081098.7069	0.092	13605.5	378.33	51160.3	819.645	74.0776	3.8963	0.9407	1.0302	1.9874	1.61	0.614	0.5908	0.9988	0.9798	-0.3656	0.9664	0.4474	17.2005	0.0251
A6	0.89	20.4958	23.1976	27.924	23.4839	27.0335	24.4857	24263.7	18.6817	0.8096	2787.23	0.3261	23950.3	650.518	1032.94	2403116667.0215	4.3692	167.61	3.874	1416.89	110.488	811.306	772.345	521.14	883.494	73.5339	838.676	1.0891	1757634974.8869	0.0597	19629.9	142.055	-20406.7	1244.35	94.9125	11.2473	0.7776	2.3099	2.8826	4.4616	0.4287	0.3645	0.992	0.9412	-0.1875	0.8856	0.3608	11.6181	0.01
A7	0.3101	13.3533	48.2349	33.2768	48.6809	47.2981	50.0642	27031.3	27.3795	0.5751	3671.23	0.3924	13945.2	557.144	918.85	5.43123e+09	4.4335	195.256	2.6288	1255.2	104.553	742.681	738.565	450.008	847.653	77.3201	752.966	0.432	13488001602.7563	0.0519	20621.6	186.617	20133.7	-122.999	103.746	7.8383	0.858	2.2684	2.5987	4.2878	0.4599	0.3989	0.9934	0.9449	-0.2519	0.9243	0.3804	12.5969	0.0058
A8	0.574	18.4893	34.0689	36.676	32.7666	34.0372	31.3771	6679.99	28.3635	0.7134	3950.89	0.3321	16161.8	693.582	924.744	18322432429.8598	4.1269	131.899	4.2849	1133.16	75.605	822.351	790.03	233.008	904.28	53.0742	807.235	-0.4607	-1.17692e+10	0.0686	16988.2	484.448	-20267.2	-164.702	57.383	3.0513	0.9062	1.4588	2.1148	1.1596	0.5648	0.5048	0.9967	0.9638	-0.3208	0.9544	0.4615	23.5644	0.0147
A10	0.3835	20.3732	56.3568	60.664	67.7539	57.8273	68.9886	11932.7	43.4405	0.48	9140.79	0.3552	7817.55	618.556	1511.09	23067066854.2199	5.8111	413.423	2.9977	2268.38	255.037	1107.61	1044.18	24.2451	2125.72	173.623	1081.64	0.1772	42248015983.6499	0.0208	110201	1829.06	988479	2734.44	574.868	28.4352	0.9007	3.8117	3.3736	12.4434	0.3494	0.2701	0.997	0.9612	-0.2541	0.9632	0.2691	41.5467	-0.0033
A11	0.6904	93.6159	134.465	232.651	173.362	236.187	238.669	923338	117.951	0.4513	103256	0.1051	964461	958.359	1780.45	1813613903646.04	5.7974	422.5	3.1389	3003.38	250.808	1361.71	1308.5	23.9611	3020.33	168.808	1384.55	0.3844	1801146688905.73	0.0181	98081.5	3791.56	1.894e+06	9189.8	764.54	9.9805	0.9691	2.5377	2.9043	5.3614	0.4248	0.358	0.9999	0.9844	-0.3592	0.9879	0.345	61.0841	0.0014
A12	0.5932	45.0213	75.9577	86.0568	94.4575	94.1531	100.415	131455	48.2492	0.5972	20434.8	0.1734	126880	66.5273	203.746	-3.30702e+09	2.8617	109.245	1.8947	215.445	44.2297	113.325	91.135	8.4252	265.49	37.7498	137.983	0.6363	-1.14267e+10	0.1533	3043.63	43.038	-25608.9	-539.733	31.1653	0.0806	0.9714	0.2844	1.0155	-0.3645	0.86	0.8538	0.9972	0.9788	-0.5928	0.9871	0.2536	3.9452	0.1033
A13	0.6198	54.2723	89.3466	92.8752	90.0832	91.7405	99.1868	237057	64.2012	0.7212	25244.6	0.1072	224693	225.686	340.638	10012989320.223	2.2258	38.5868	7.3575	468.196	16.3637	316.147	300.408	108.408	384.187	14.5084	266.921	1.1203	-9.22822e+09	0.2618	1116.18	109.037	-1329.57	-414.678	-16.4944	1.1168	0.8892	0.3605	0.8777	0.3501	0.8695	0.8603	0.9993	0.9843	-0.5103	0.9473	0.2438	7.5111	0.1713
A14	0.6909	31.4748	38.9824	44.2591	45.4089	44.4689	48.4506	55190.1	36.4099	0.6891	5418.17	0.2238	31928.4	1220.4	1982.77	57850023189.6225	5.5854	431.903	3.2171	2506.83	247.786	1567.11	1585.98	304.261	2255.34	174.719	1568.76	0.0929	65113454099.4531	0.0211	99221.2	2795.54	967361	656.708	554.795	33.7098	0.8969	4.2524	3.5611	13.3275	0.325	0.241	0.9962	0.9592	-0.2433	0.9499	0.246	51.4386	0.0028
A15	0.65	26.8344	43.8237	51.4808	42.7604	39.0075	54.8996	32492.2	29.3334	0.6347	6019.64	0.2778	37870.1	1447.29	2846.78	119641276116.946	6.4884	770.526	2.6753	3811.8	432.708	2117.84	2072.88	439.357	3367.64	316.345	2224.43	0.124	122958567610.286	0.0144	293004	5329.11	6.74817e+06	7545.75	1634.77	161.781	0.8204	9.2597	4.6624	70.8516	0.2091	0.1063	0.9914	0.9393	-0.155	0.9256	0.1204	69.7477	9e-04
A16	0.7828	12.9223	15.6502	21.5979	15.6196	22.6795	18.9155	-4156.92	9.6624	0.7516	908.413	0.5401	-20199.8	452.036	1028.81	-1.51889e+09	4.9324	289.402	2.7457	1391.41	175.696	706.047	667.391	163.959	1157.96	126.435	721.334	0.5934	4743340586.3491	0.0397	42981.1	443.476	172295	2227.96	207.195	26.7115	0.7631	3.8393	3.4981	12.6244	0.3229	0.2436	0.9888	0.9287	-0.193	0.9157	0.2433	21.516	0.0051
A17	0.8759	82.8135	92.8426	104.35	114.789	112.43	120.433	459978	84.919	0.7858	37455.5	0.0869	503203	406.15	895.224	193283868617.963	5.0082	238.982	4.1234	2042.92	148.099	599.929	588.109	39.4591	2040.3	93.4397	676.491	0.8515	199666896417.602	0.0462	37279.5	606.731	157994	2746.99	190.163	16.3033	0.8472	3.0174	3.0917	6.9356	0.3626	0.2874	0.9977	0.9664	-0.1896	0.9041	0.2902	24.5536	0.0016
A18	0.7151	16.8835	28.5957	30.0135	21.5457	27.5345	30.3675	-3638.07	18.405	0.7219	4188.61	0.3746	3131.39	931.725	1388.79	4098641229.0429	4.9468	254.734	3.2	1888.95	143.186	1124.03	1163.18	622.834	1254.59	102.229	1186.57	0.1802	8375712237.4333	0.0307	32413.5	532.113	117326	530.851	175.647	18.7084	0.8095	3.4211	3.1675	5.6549	0.3478	0.2519	0.9932	0.943	-0.2135	0.9141	0.2625	21.1311	0.002
A19	0.612	71.6849	114.191	123.035	126.351	132.624	134.551	496166	95.6786	0.7226	39236.9	0.079	508655	589.044	1145.77	358750750441.171	5.2102	301.99	3.5516	1967.5	177.323	895.745	840.525	51.0266	1949.02	129.262	922.437	0.5535	390856084072.755	0.0335	49328.4	1118.87	302023	2924.19	316.654	22.6761	0.8753	3.3347	3.3262	9.0951	0.3412	0.245	0.9961	0.9575	-0.2131	0.9386	0.2416	32.4056	4e-04
A20	0.1133	15.0329	138.507	109.608	107.297	29.8277	128.018	5271.52	31.1493	0.5266	4618.01	0.4069	13643.1	575.151	1269.06	3928657081.3611	5.3054	409.782	2.7196	1665.31	237.819	838.027	765.171	212.828	1377.69	172.073	892.947	0.7153	1027299152.4285	0.0291	81660.9	772.029	510488	7738.84	456.192	21.2022	0.9037	3.3611	3.2723	8.477	0.3801	0.2787	0.994	0.9492	-0.2572	0.9537	0.2844	26.7096	0.0038
A21	0.8485	28.28	36.2892	36.4948	38.1703	37.5665	44.5542	29468	33.401	0.7525	5726.05	0.2324	16066.8	605.224	1181.81	21026046323.0331	4.9808	232.158	4.3905	1879.33	163.23	818.317	782.28	397.55	1464.07	103.44	848.416	1.1565	16249134062.3027	0.0426	45505.5	443.963	221543	4299.38	215.957	20.5685	0.8189	3.321	3.3397	9.0363	0.3491	0.2654	0.994	0.9449	-0.1754	0.8891	0.2716	17.7821	0.0042
A22	0.8654	30.8805	31.9861	41.0431	41.0518	43.6794	43.8401	20794.9	34.5307	0.8268	7546.41	0.2067	-2987.21	373.147	451.396	3462622492.8269	2.8925	46.1134	3.1672	611.005	34.5945	436.447	468.529	344.895	377.811	21.6218	490.916	0.3144	6812680574.6905	0.1569	1986.56	117.578	22331.8	453.945	9.0552	3.8723	0.7671	0.828	1.5888	0.4448	0.6464	0.636	0.993	0.9469	-0.2484	0.8454	0.4956	6.9705	0.0469
A23	0.147	25.2843	171.029	60.3098	41.4097	157.297	160.691	23286.8	32.2583	0.5937	7572.65	0.277	7536.85	227.022	1287.95	26445328188.5149	5.5474	249.775	4.3237	2560.83	269.733	763.16	733.434	-28.9202	2474.55	147.412	895.796	0.7492	9653406663.1284	0.033	154325	1013.44	2.40223e+06	10785.1	720.266	69.2609	0.8289	4.6653	3.6314	45.5535	0.358	0.2782	0.9937	0.9584	-0.2314	0.9546	0.2834	30.3183	0.0048
A24	0.7934	14.5076	13.4226	18.2904	17.1789	16.2064	26.3407	-9999.21	12.5598	0.779	833.077	0.5461	957.726	782.113	1118.92	7243242480.4588	4.2232	186.826	2.4169	1335.14	103.731	954.369	937.035	666.94	688.919	75.0672	956.962	0.3276	3818267900.7971	0.0552	14497	124.784	-7591.22	356.065	90.0919	11.7929	0.7365	2.6116	2.8125	4.8993	0.4241	0.3237	0.9866	0.9215	-0.1867	0.8713	0.3226	11.2618	0.0097
A25	0.8047	17.5385	24.3399	30.7857	24.9934	25.7051	29.4237	36364.4	23.7549	0.8211	1566.83	0.3152	19294.1	672.955	974.397	11936464468.8765	4.2959	134.31	5.0602	1379.61	106.387	814.952	807.369	473.908	942.915	57.5262	834.731	1.2209	7948461159.9752	0.0655	17920.3	150.3	-55844.4	1183.08	119.904	12.1802	0.7801	2.314	2.8436	5.4929	0.4633	0.3825	0.993	0.9468	-0.1919	0.8916	0.3718	14.0901	0.0127
A26	0.476	28.0986	60.9563	63.4865	53.8873	39.2296	72.001	44214.1	31.3085	0.7306	8208.01	0.2028	9118.5	1185.93	1534.31	78307004389.3006	4.5641	186.494	4.0147	2140.25	120.418	1336.47	1333.42	563.196	1608.58	81.7605	1358.75	0.3232	76762562246.3278	0.0456	22684.7	1007.64	29273.2	556.847	137.069	10.6299	0.839	2.4784	2.7668	5.0686	0.4076	0.327	0.9975	0.9646	-0.2076	0.9152	0.3351	31.9274	0.0023
A27	0.8539	99.0291	114.906	120.558	135.184	126.141	129.518	836872	100.207	0.7842	56292.9	0.0578	855193	305.932	689.47	224310704642.842	4.8143	252.243	8.7517	2423.99	134.182	529.397	484.776	-0.5044	2386.78	99.9226	529.561	1.4009	253460523316.362	0.0541	28944.2	485.333	199150	2893.47	187.181	10.3422	0.9088	2.1315	2.5018	3.9897	0.4729	0.4103	0.999	0.982	-0.2951	0.9576	0.3854	20.1879	0.0067
A28	0.9197	66.6605	75.8991	86.1262	88.1734	87.4776	92.0146	220522	71.3984	0.7563	24435.4	0.0751	269706	516.173	887.074	116049500633.163	4.5886	203.962	6.8714	2420.04	118.263	667.294	666.827	103.609	2352.76	83.3572	695.08	1.1357	120882159469.076	0.0469	23249.9	624.594	157032	1300.95	152.555	8.3027	0.8558	2.0755	2.6994	4.461	0.4507	0.3889	0.999	0.9773	-0.2491	0.9395	0.3846	23.9963	0.0049
A29	0.6599	1.2171	0.6752	0.7124	-3.8656	0.6659	-0.0544	10473.5	-2.4854	0.657	220.76	0.6447	-18149.4	-17.1653	-39.5329	19397974076.4081	0.62	14.4181	0.5738	46.1459	1.9344	-10.1866	14.4799	20.4434	39.2354	101.07	730.386	1.3064	6319783963.1654	0.0446	39931.7	347.576	206235	3369.48	178.684	24.3055	0.7597	3.471	3.3734	12.5541	0.3478	0.278	0.9928	0.9445	-0.1582	0.8753	0.2785	19.2379	0.0074
A30	0.5831	34.0562	60.5267	65.3302	59.0063	45.9008	66.1837	36643.4	39.3077	0.7777	9063.66	0.1673	60448.7	522.035	932.776	25588650916.7355	4.9864	256.575	3.3766	1631.42	148.75	744.308	753.458	109.172	1546.65	101.474	763.216	0.3013	30170982759.7913	0.0342	31975.5	697.332	212148	1193.96	205.907	18.8883	0.8342	3.0601	3.2065	6.87	0.3671	0.291	0.9956	0.9541	-0.2017	0.918	0.2878	25.6056	0.0046
A31	0.7374	26.2861	35.4419	44.9197	46.7672	36.243	45.9072	8346.75	29.8853	0.7672	6042.09	0.2338	6131.06	852.009	1183.55	29153476193.7501	4.6743	154.678	12.1001	2916.01	106.465	996.393	1018.55	281.786	2546.58	67.776	1042.05	1.5161	29104739627.9312	0.0546	29309.3	825.654	286258	2605.44	164.73	11.1811	0.84	2.2919	2.8187	8.0547	0.4494	0.3952	0.9989	0.9789	-0.2386	0.9309	0.3721	28.927	0.0103
A32	0.7223	22.3437	27.1978	28.7467	30.3149	31.3705	31.5378	23387.7	23.9845	0.7323	4274.79	0.2981	6853.46	619.031	907.916	6868359141.9941	4.0387	143.088	3.2969	1208.51	81.1525	758.823	753.696	465.288	756.374	61.8663	749.488	0.527	-9.9404e+09	0.0754	9247.95	175.115	-62688.6	162.943	55.9918	9.0162	0.7357	2.0989	2.6608	5.3498	0.4624	0.3771	0.9919	0.9453	-0.1838	0.8432	0.3805	12.2926	0.0071
A33	0.8207	45.4653	59.262	69.3053	61.573	67.4645	67.0552	93810.9	57.1111	0.7739	13856.9	0.121	115819	502.206	801.256	53787344702.354	4.3071	133.816	10.249	1759.31	106.301	649.487	640.021	212.761	1610.17	61.3041	699.362	2	54943799461.6682	0.0632	24614.5	385.547	139195	1720.07	99.684	10.2037	0.8193	2.0722	2.6917	5.6314	0.4729	0.3955	0.9975	0.9684	-0.2118	0.9063	0.3932	19.239	0.0096
A34	0.4521	51.4413	119.717	154.018	139.033	165.469	204.802	-10350.8	82.8435	0.4296	7308.91	0.4436	31361.8	647.845	1118.49	10270034521.3451	4.9022	240.234	3.3792	1793.36	150.447	882.492	797.788	283.276	1576.55	101.771	886.243	0.707	7142500041.0397	0.0434	35787.2	529.358	50745.2	1467.61	154.99	40.0294	0.5884	4.3844	3.7097	18.7977	0.3154	0.2238	0.9906	0.9387	-0.093	0.7477	0.2385	21.3569	0.0066
A35	0.5945	106.2	177.323	204.572	189.714	196.18	220.585	1.84188e+06	143.799	0.6829	108520	0.0545	1.80055e+06	416.145	816.051	674285169649.033	4.6531	215.477	3.6133	2469.05	117.816	544.663	562.498	27.1135	2421.52	85.6792	640.763	0.6272	709813534690.812	0.0447	22159.4	578.469	78780.8	890.839	140.745	12.0943	0.8587	2.4394	2.8914	5.1216	0.4336	0.343	0.9986	0.977	-0.224	0.9207	0.3479	24.1508	0.0033
A36	0.6457	90.0343	138.638	139.389	171.695	168.56	174.182	842418	110.784	0.3924	116466	0.1372	873755	462.507	758.414	3.50856e+11	4.3807	186.494	2.7439	1512.16	105.81	625.466	597.062	94.7006	1367.73	78.9287	672.005	0.1009	342904357315.978	0.0591	16540	484.069	15065.6	-208.663	114.329	8.1348	0.8228	2.3154	2.6527	4.4803	0.445	0.3563	0.9978	0.9647	-0.2004	0.8852	0.3579	21.0406	0.0041
A37	0.5092	17.3824	31.3554	41.8471	25.724	27.9568	37.764	13629.6	18.1795	0.5304	4649.87	0.5521	-10904.5	559.721	822.926	4632416393.6085	4.2014	118.502	5.0348	1290.8	83.9643	667.049	656.188	372.401	932.294	54.9265	674.721	0.9808	-3.21996e+10	0.0731	12500.4	175.007	8728.11	988.223	52.7471	8.4782	0.731	2.1161	2.7031	3.4312	0.4271	0.3692	0.9937	0.9441	-0.156	0.8329	0.3713	11.6564	0.0095
A38	0.5023	45.6382	93.7746	95.0166	101.812	65.6605	100.52	165539	54.2467	0.6179	21609.5	0.1422	154935	762.519	1188.03	138794526106.767	4.654	229.239	2.843	1716.29	130.208	995.807	928.773	392.341	1314.51	88.7752	977.628	0.3788	157326019916.512	0.0433	24625.7	626.894	38999.1	305.904	153.483	11.9227	0.8662	2.5656	2.8821	3.8978	0.4154	0.3525	0.9968	0.9593	-0.2165	0.9184	0.3367	23.9147	0.0032
A39	0.8281	26.3662	30.4118	34.3896	37.2806	36.4831	35.6083	6107.27	30.5748	0.841	4510.62	0.2295	-8593.19	611.689	996.881	11058641396.6562	4.3823	127.281	3.9259	1386.29	108.515	797.164	802.17	368.868	889.317	60.6231	843.072	-0.0192	3561314053.1436	0.0629	19104.4	338.45	126662	-586.237	98.8787	11.6248	0.8166	2.4139	2.7189	4.8278	0.4403	0.3578	0.9933	0.9452	-0.1937	0.8932	0.3471	18.979	0.0096
A40	0.6736	26.4091	41.4107	43.9445	44.4858	47.275	44.8619	31498.1	32.0955	0.8426	2809.56	0.2	-17254.3	480.849	1111.08	19935333416.939	5.2621	325.333	3.8036	2099.92	188.638	752.494	671.065	38.1994	2020.71	131.173	787.548	0.8647	22095541937.9012	0.0314	60950.9	836.434	520440	5657.3	347.094	25.0796	0.8584	4.0485	3.3364	10.7628	0.3352	0.229	0.9964	0.9539	-0.1825	0.9136	0.2461	27.9549	0.0016
A41	0.6489	32.9268	52.2359	55.1685	54.7893	48.991	58.0658	53794.5	41.1763	0.7615	8113.36	0.1746	70219.2	665.202	1067.43	25614180287.7705	4.5027	180.044	3.43	1451.95	105.759	858.586	838.884	209.478	1296.26	78.1288	849.623	0.0132	37536886144.6714	0.0539	18122	702.007	-4056.37	-162.591	120.696	5.1415	0.887	1.9038	2.5472	2.1571	0.4665	0.4177	0.9972	0.9641	-0.266	0.941	0.3935	26.0534	0.0066
A42	0.776	34.0302	47.8489	47.3614	47.584	51.3643	48.9744	63332	45.2567	0.8384	7423.36	0.1545	82955.2	989.807	1230.95	70717413889.2368	4.1029	113.878	4.7858	1516.5	78.6018	1104.2	1111.92	490.75	1124.61	51.1627	1085.23	-0.3018	70199808140.7104	0.0711	12466.9	671.137	24889.7	-417.377	50.3289	3.9637	0.8299	1.7452	2.3872	1.2367	0.4983	0.4371	0.9968	0.9626	-0.2314	0.9083	0.4149	26.4542	0.0085
A43	0.5407	37.8379	69.587	78.1851	76.9188	71.7113	89.4307	99955.7	57.0109	0.5561	16465.2	0.159	85152.4	918.829	1475.92	162189280511.642	5.1713	312.509	2.6984	2124.3	168.769	1201.7	1191.16	281.968	1798.17	127.041	1238.88	0.1652	125252316100.817	0.0333	52868.6	1329.04	299402	807.894	291.827	16.3088	0.8934	2.9037	3.0811	6.794	0.3974	0.3026	0.9962	0.9632	-0.2383	0.9527	0.3093	36.4644	0.0034
A44	0.3755	9.7585	27.8753	33.9916	25.4881	20.3161	38.1874	-1042.75	19.5998	0.5704	293.976	0.6116	14960.4	647.005	807.476	19219287219.8638	3.7045	94.7435	5.1059	1232.37	62.9938	788.86	730.133	537.145	691.134	35.232	804.789	1.0453	-1.25079e+10	0.1021	2367.8	76.0872	57506.6	-100.197	32.3314	3.7779	0.7891	1.4166	2.2265	2.741	0.5376	0.472	0.9953	0.9521	-0.2342	0.8883	0.4544	8.9868	0.0211
A45	0.7176	44.2541	62.133	69.5108	72.0295	74.0344	73.0916	116681	50.6472	0.5503	20676.7	0.2079	101935	708.646	1365.41	101592379406.395	5.1716	242.552	4.1528	2206.61	194.665	1007.28	952.72	113.653	2151.74	118.38	1004.4	0.8619	119671737753	0.0398	70374.4	1307.05	563308	6919.99	374.926	16.8872	0.9223	2.4549	2.999	8.5764	0.4544	0.376	0.9982	0.9731	-0.2899	0.9759	0.3605	34.2827	0.0022
A46	0.6503	19.2845	26.4946	31.0309	28.0549	31.5775	30.6257	19068.7	22.0983	0.754	3420.29	0.3336	29792.6	586.543	829.293	-1.84382e+10	4.0063	117.704	4.178	1067.82	86.0162	710.154	671.047	270.421	749.253	47.2021	715.875	-0.4372	-8.15135e+09	0.0792	12895.9	402.779	77528.5	-55.5554	53.6258	6.3859	0.804	1.878	2.4795	2.9407	0.4717	0.4352	0.9947	0.9512	-0.2305	0.8965	0.4076	19.4749	0.0157
A47	0.8095	26.493	29.9632	37.7343	38.3161	35.4538	34.8682	622.755	28.4597	0.8155	1947.29	0.2367	24321	590.239	1082.21	11120052706.8134	4.9917	254.849	3.2617	1613.28	145.465	831.279	788.399	177.498	1463.6	111.993	791.388	0.5085	-7.77386e+09	0.0375	37171.2	757.747	100605	1636.46	207.148	36.9693	0.6809	4.625	3.6677	12.8316	0.3019	0.1989	0.9904	0.9297	-0.1093	0.7958	0.1953	24.7188	2e-04
A48	0.55	24.0891	44.0636	51.8217	40.2184	52.6958	55.3024	1772.55	35.8441	0.6373	6989.83	0.2812	27300.1	589.89	1340.21	33643302951.8172	5.4751	394.728	2.6859	2075.46	239.332	949.106	932.564	116.329	1936.49	165.784	982.48	0.3821	32424777450.4659	0.0263	85950.5	1146.69	516568	2809.81	415.204	59.2507	0.755	5.9619	4.0018	24.5261	0.2377	0.1546	0.9912	0.9355	-0.1293	0.8504	0.1711	32.3448	0.0021
A49	0.7987	16.9834	21.6811	24.5777	22.4649	28.6861	28.5191	7396.04	17.0546	0.6652	602.747	0.4424	-23679.1	847.419	1125.14	14020387552.9862	3.9438	130.687	2.8134	1262.36	80.8297	995.44	974.059	685.796	541.859	54.1511	981.625	-0.1741	3984347265.9518	0.0764	8211.15	163.289	15805.1	-32.3642	65.7991	3.3695	0.8595	1.4735	2.2375	1.2786	0.5245	0.4701	0.9917	0.9382	-0.2659	0.9269	0.4214	11.1104	0.0125
A50	0.5657	8.4337	20.2312	14.3965	20.7196	23.8772	21.9536	-2664.81	12.4524	0.7633	-503.018	0.5531	18893.8	1684.71	2025.3	-8.61198e+09	4.5653	221.015	2.9797	2198.09	124.502	1899.11	1902.55	1417.82	815.489	87.7866	1880.8	-0.5823	33129784519.2832	0.0505	24171.6	431.561	-46839.2	-513.102	124.92	15.9078	0.7579	3.1213	3.0039	6.0167	0.3599	0.2568	0.9857	0.9142	-0.1835	0.882	0.2689	17.6764	0.0026
A51	0.634	40.9093	55.3531	59.4744	59.4311	63.5568	60.8161	55400.7	45.5436	0.7707	11282.4	0.1382	65534.2	955.169	1886.38	132753414723.774	5.8416	454.207	3.0049	2791.85	277.65	1394.13	1372.13	153.065	2716.67	189.331	1490.32	0.0804	150088504948.691	0.0224	127421	2730.29	1.64411e+06	895.45	732.439	41.6805	0.8912	4.8877	3.6837	20.0411	0.2999	0.2298	0.9967	0.96	-0.2198	0.9552	0.2094	49.7894	0
A52	0.726	47.8134	62.79	73.0534	69.1865	72.2508	76.0631	116553	54.2089	0.8339	12773.6	0.1447	93009.7	507.211	1046.24	66047048128.5324	4.996	242.392	4.0743	2061.51	166.524	729.746	660.571	140.625	1959.66	115.93	720.904	1.0334	60254131153.5719	0.0422	48996.8	643.352	156010	4259.57	247.596	17.3645	0.8749	2.801	3.089	10.2047	0.4191	0.3521	0.9974	0.9663	-0.2269	0.9362	0.3416	23.8945	0.0068
A53	0.7396	18.8504	26.2069	25.8343	26.2828	27.6772	31.5936	-13206	22.6613	0.826	3628.7	0.2847	4571.49	571.484	1129.32	12897631823.2156	5.0571	271.256	3.743	1726.4	176.687	802.467	772.88	282.609	1398.68	119.737	845.303	0.961	-2.01548e+09	0.0391	51075.7	506.366	107703	3245.65	219.226	31.1085	0.73	4.4816	3.6446	15.1067	0.3095	0.2188	0.9897	0.9307	-0.1384	0.8348	0.2207	21.4677	0.0028
A54	0.7026	14.6683	17.7894	21.6796	24.848	23.9646	18.8553	5218.94	15.7212	0.7118	1364.42	0.5011	671.407	904.238	1445.73	14047388168.2732	5.0805	312.268	2.2316	1751.49	170.682	1151.3	1110.2	673.442	1082.67	132.535	1202.78	0.3369	23704047993.4008	0.0355	38072.7	306.862	145272	994.158	244.613	18.8418	0.8307	3.5283	3.1955	7.1826	0.3428	0.269	0.9896	0.9283	-0.2135	0.9363	0.255	16.5064	0.0026
A55	0.5982	11.7012	21.7566	19.5806	21.7089	17.9922	26.1193	-7663.36	14.2802	0.8104	1735.36	0.4512	19090.8	747.45	1651.79	12976176567.3246	5.6573	520.924	2.4447	2396.6	291.877	1145.62	1050.2	484.311	1894.52	214.037	1185.28	0.7186	-1.1195e+10	0.0233	118990	735.121	953059	10133.7	541.581	101.744	0.6823	7.2291	4.3535	48.4836	0.2544	0.1789	0.9845	0.9212	-0.2083	0.9401	0.1743	24.8578	0.0035
A56	0.5298	86.7083	164.989	187.811	189.174	192.922	206.243	1.43345e+06	153.784	0.4298	143522	0.0977	1.40019e+06	777.206	1140.05	1258480989036.16	4.4018	187.445	3.7675	2081.15	113.699	922.07	921.362	42.1775	1998.56	74.8435	929.451	0.7138	1277341041138.68	0.0577	21578.7	1290.83	99336.9	766.213	94.6088	2.8932	0.9505	1.224	1.9472	1.9777	0.6243	0.5846	0.9996	0.9857	-0.4294	0.9898	0.4593	36.1744	0.0139
A57	0.7296	16.0522	23.8606	27.3236	26.6951	20.7092	36.1441	44390.2	20.354	0.7924	453.218	0.3349	-2918.55	418.861	892.042	-1.31101e+10	4.7399	223.214	4.0304	1344.46	146.268	662.551	590.094	220.582	1074.33	92.2817	650.893	1.0579	9193257308.9988	0.0452	31803.3	228.362	118182	2221.91	158.481	22.7588	0.7407	3.4742	3.2858	10.3263	0.3589	0.2632	0.9892	0.9307	-0.1626	0.8636	0.2766	15.6766	0.0041
A58	0.716	17.2699	18.844	29.218	29.2718	23.9818	30.0849	-7562.96	22.9715	0.7839	3487.81	0.3138	30628.8	335.059	996.863	-2.07692e+10	5.3769	274.519	6.8671	2317.9	211.655	592.792	547.71	25.7607	2310.49	126.701	698.374	1.7271	-3.63564e+09	0.0345	87864.6	635.312	957005	12146	372.868	64.213	0.6886	5.6189	3.9444	34.7606	0.2719	0.2072	0.9933	0.9474	-0.1395	0.87	0.2142	22.071	0.0028
A59	0.6369	20.2166	34.7116	31.0629	35.3188	28.9334	33.0898	24972.6	24.5256	0.7724	2876.25	0.3286	29786.7	772.112	1040.21	12938752627.9307	4.2849	136.496	6.8942	1673.95	100.073	900.062	900.391	597.058	1108.86	57.0847	911.903	1.634	25203033517.8382	0.0689	24451.9	223.638	43341.5	2200.12	108.816	10.2369	0.8539	1.8493	2.6598	4.2152	0.4743	0.4121	0.996	0.9593	-0.2337	0.9052	0.3925	15.2823	0.0083
A60	0.1798	15.3144	85.7605	30.6559	34.0683	49.9843	65.0103	20687.8	22.8985	0.6474	2559.64	0.3805	26102.9	790.028	1324.72	18414615415.9322	5.0072	310.086	3.288	2073.77	177.046	1061.2	1027.99	583.485	1431.2	125.836	1038.85	0.6507	-3.36122e+08	0.0303	48249.7	462.376	203590	1986.16	250.324	38.3564	0.7161	4.5863	3.659	17.0893	0.3088	0.217	0.9895	0.9347	-0.1501	0.865	0.2373	18.0502	0.0029
A61	0.8242	34.0768	42.7997	47.7914	48.0972	49.1627	52.0416	36321.4	39.8882	0.8112	6825.98	0.1825	63859.6	749.441	1040.01	34596658798.5903	4.5872	190.407	3.6969	1819.55	114.157	890.839	862.019	308.004	1560.15	82.4572	904.261	0.3919	30368310367.4624	0.0544	21050.7	524.623	115065	481.604	125.607	16.0867	0.7654	2.9385	3.05	6.7496	0.3928	0.2994	0.9964	0.9579	-0.1603	0.8506	0.3042	25.5568	0.0093
A62	0.6762	20.4313	30.5795	38.82	23.1525	38.4799	35.9771	1976.65	22.6671	0.7403	4665.68	0.3163	12449	830.285	1064.2	-3.85369e+09	4.1821	139.366	3.5473	1325.09	91.7602	990.952	973.994	445.566	960.041	56.413	935.876	-0.1266	13362270854.0984	0.0628	11379.7	477.365	52078.4	71.0414	53.1001	6.0164	0.8358	1.7869	2.4378	1.6299	0.4873	0.4293	0.9954	0.9559	-0.2437	0.9171	0.4115	20.2596	0.0094
A63	0.7116	18.7033	26.2692	26.0253	26.1537	26.0174	23.2378	31196.1	24.3899	0.7702	1175.42	0.3376	-3018.36	207.315	1009.07	20945995508.9042	5.2328	287.087	6.2717	2381.86	254.803	485.733	368.23	36.1601	2348.42	143.503	578.367	1.8256	29932159629.0517	0.0432	116647	411.177	1.71801e+06	20295.6	491.387	91.8139	0.6739	5.8341	4.0147	57.2851	0.3185	0.2249	0.991	0.9477	-0.1694	0.8959	0.2482	18.3973	0.0026
A64	0.7813	48.9238	65.0691	70.5514	71.3814	69.4313	73.2351	90923.9	56.2066	0.8334	13469.5	0.1065	131642	663.622	874.115	71133757828.9914	3.6968	106.855	3.0754	1234.02	63.5549	780.067	782.886	374.932	909.127	42.114	805.039	0.0405	82858048699.2838	0.0861	1512.23	274.396	651.102	75.2606	28.5738	1.598	0.8816	1.0013	1.8967	1.3807	0.6012	0.5863	0.9985	0.9754	-0.3254	0.949	0.4836	16.5017	0.0232
A65	0.6251	101.219	160.568	173.576	174.518	143.285	174.183	1.54972e+06	132.123	0.8415	76679.9	0.0522	1.57689e+06	367.727	640.852	436170745087.277	4.2031	123.966	4.5097	1344.09	85.7054	499.348	519.861	71.5625	1244.37	54.7004	524.552	0.3322	435603156080.788	0.0678	11261	279.787	95252.9	177.079	84.208	4.823	0.9071	1.2311	2.0888	1.9225	0.553	0.5053	0.9983	0.9767	-0.3331	0.9642	0.4632	18.0096	0.0155
A66	0.5316	48.1022	85.4449	86.6643	98.6326	73.3999	103.907	113083	60.7813	0.5877	19821.7	0.1405	174360	606.869	915.368	83711048814.3686	4.2545	144.179	4.1788	1463.39	86.3152	725.632	740.377	319.32	1167.02	57.3574	711.387	0.6803	68480364499.7068	0.068	13892.7	369.273	-93390.4	-284.249	86.7593	4.3997	0.863	1.726	2.4322	2.4374	0.502	0.4616	0.9976	0.9676	-0.2685	0.9326	0.4243	17.3209	0.0134
A67	0.6553	14.6643	21.1577	21.015	31.0996	23.1807	21.9081	27309.6	20.5654	0.7921	2914.06	0.3369	-26005.9	478.358	1399.04	18764822854.4052	5.7356	558.692	2.4237	2031.95	307.414	864.408	814.521	106.169	1906.33	230.705	953.862	0.4966	-1.61685e+10	0.0205	126824	1067.55	1.15899e+06	10492.1	655.212	72.7244	0.8011	6.1827	4.111	28.0689	0.2552	0.1508	0.9892	0.9312	-0.183	0.9358	0.1695	29.0716	0.0024
A68	0.6363	19.8915	34.9733	35.0223	34.7927	37.3434	33.4501	10097.2	28.992	0.7385	3965.86	0.2717	17499.6	391.657	601.454	7174201538.1168	3.4595	79.7727	3.6186	763.016	47.7337	478.534	485.661	266.673	563.431	31.2814	451.596	0.4279	13822182156.2808	0.1042	104.006	124.382	-5758.2	-366.657	37.818	1.8225	0.8312	1.1265	1.8516	0.5701	0.5958	0.593	0.9963	0.961	-0.2834	0.9152	0.4778	10.3088	0.0289
A69	0.6149	38.0946	63.5156	86.9666	76.7491	57.9788	81.0054	65529.2	45.1259	0.7231	12051.2	0.1486	84322.8	952.24	1796.28	149230631632.206	5.6889	461.846	3.2094	2816.32	265.624	1402.18	1391.73	231.362	2557.39	186.914	1415.58	0.0581	130623349506.467	0.0258	111375	2279.2	1.10388e+06	-649.295	631.276	55.3613	0.8446	5.5362	3.9682	23.7772	0.2787	0.1851	0.9946	0.9509	-0.1642	0.9146	0.1846	47.3137	0.0024
A70	0.7293	62.4865	94.8152	96.2533	101.469	100.404	105.184	376139	79.1167	0.8423	27336.6	0.0852	324829	728.372	1123.56	284950570652.045	4.6911	216.676	5.541	2413.25	119.368	933.978	914.052	161.647	2340.25	89.2954	960.02	0.6731	281029452746.724	0.0383	29038.8	1184.26	137779	798.277	158.763	16.6567	0.778	2.9659	3.1229	7.6725	0.3732	0.31	0.998	0.969	-0.1723	0.877	0.3009	32.3421	0.0023
A71	0.79	41.8739	51.6788	61.7105	62.6898	53.3203	63.2241	76188.5	48.1179	0.779	10537.7	0.1618	52315.7	1036.55	1493.22	111353621931.892	4.9109	217.876	3.7256	2228.69	136.521	1224.52	1194.79	635.417	1589.15	89.1739	1211.31	0.5913	125267366307.199	0.0421	32135.2	607.168	55005.2	1040.26	130.444	14.3821	0.8484	2.7807	2.9979	6.6935	0.4145	0.3255	0.9972	0.9622	-0.2196	0.9232	0.3318	24.9236	0.0055
A72	0.8723	21.0937	22.0483	27.4292	28.1151	23.867	26.7175	-4.0504	20.8551	0.8291	1030.01	0.2883	18840.3	1214.34	1558.03	13039411754.6836	4.6471	171.997	5.7197	2358.16	107.863	1361.12	1395.47	922.977	1430.6	74.1659	1409.89	0.9281	12936331117.8323	0.0473	25671.5	342.189	48026.8	428.615	66.6336	39.419	0.3552	4.6974	3.7885	15.9765	0.3035	0.2104	0.9888	0.9286	-0.0566	0.5748	0.2042	17.9208	0.0045
A73	0.5485	10.2621	17.3276	20.158	13.1059	15.1057	18.5875	5976.59	13.3759	0.7711	1865.62	0.5966	-11133.9	599.85	910.401	4104711310.0484	4.3201	158.251	4.0103	1354.79	98.845	771.736	766.996	495.659	931.61	70.077	801.867	0.7476	10826421256.5088	0.0584	18379.2	145.799	31742.8	512.485	78.1277	15.8725	0.6668	2.8539	2.9896	7.4147	0.4169	0.3352	0.9888	0.9322	-0.194	0.8824	0.3367	11.3924	0.0116
A74	0.8049	34.0851	42.988	48.0729	41.823	43.5565	48.9709	10311.4	36.145	0.7165	5207	0.2113	43276.5	619.064	887.545	20204687851.885	4.1877	151.696	3.4917	1279.37	84.264	724.594	727.274	471.01	868.182	69.5355	751.653	0.608	37652904331.0353	0.0633	10882.4	166.834	26864.8	-1.1495	71.8654	4.3221	0.9162	1.1966	2.154	1.2705	0.5687	0.5227	0.9974	0.964	-0.3329	0.973	0.4561	12.9662	0.0144
A75	0.714	34.1478	46.5808	55.1645	46.6381	52.1518	58.0319	54715.2	39.3769	0.7456	9073.88	0.1708	61409.3	535.303	1032.35	18082114464.016	4.3375	138.1	6.4803	1771.64	144.173	637.282	596.08	396.37	1411.4	86.2354	745.081	1.8653	35460469916.519	0.0728	44628.6	227.888	199271	5738.87	155.837	15.2717	0.8404	2.5633	2.9075	8.9912	0.4728	0.4152	0.995	0.9602	-0.2335	0.8941	0.3734	13.994	0.0183
A76	0.8584	22.903	24.0348	29.5643	28.6624	24.9544	39.4186	8344.26	23.2855	0.8204	1657.62	0.2754	30291.2	680.417	1130.24	8203497101.8398	4.7584	229.82	3.7835	1711.02	148.881	875.251	757.322	94.1751	1541.61	100.022	864.721	1.0817	11889226554.8409	0.0523	34323.8	949.805	125440	2934.12	151.036	28.041	0.7031	3.6179	3.3157	12.3813	0.3729	0.3105	0.9938	0.9486	-0.1721	0.8393	0.275	30.4958	0.0074
A77	0.7452	50.3872	70.2228	83.311	78.5867	71.844	79.1902	148478	52.2837	0.6968	18617.8	0.1376	116391	451.694	978.057	87259917107.4684	5.0504	274.173	3.7465	1801.84	172.841	681.668	634.296	12.8515	1836	114.461	713.456	0.8045	75868299270.2152	0.0365	45286.3	828.587	236110	3327.44	284.3	12.9077	0.891	2.9458	3.0691	7.6803	0.4065	0.3103	0.9972	0.9635	-0.2454	0.9467	0.3187	27.3371	0.0021
A78	0.4564	11.1919	26.321	26.2519	29.4372	15.0692	27.5996	-12604	11.927	0.7495	348.671	0.4471	20178.7	747.927	1134.34	-2.78771e+09	4.4717	207.503	2.3312	1320.88	116.225	941.96	922.434	552.53	679.241	90.5553	953.386	0.1738	4383247673.3402	0.0494	21065.7	286.023	2044.54	174.512	108.618	9.7907	0.8502	2.503	2.7892	3.8157	0.4184	0.3314	0.9891	0.9291	-0.232	0.9337	0.3504	14.551	0.0032
A79	0.8352	16.3564	13.7625	23.3721	23.8661	21.2747	20.3275	-13015.6	16.7612	0.8057	578.33	0.3956	-8769.95	564.747	962.007	-1.5843e+10	4.525	230.128	3.0746	1318.95	130.199	684.911	668.93	472.678	838.003	98.2474	721.501	0.9404	22137633029.997	0.0545	27214.4	137.708	-3980.21	1313.35	119.157	23.1052	0.6743	3.4547	3.2089	9.2939	0.3872	0.318	0.9836	0.9161	-0.1742	0.8365	0.2888	11.0455	0.0063
A80	0.8235	47.7305	59.7626	61.5636	60.0253	73.5645	75.2353	92623.7	49.8548	0.8186	15497.3	0.1297	83356.8	90.6038	115.524	10326720204.4909	1.648	18.9959	4.5346	211.807	19.7631	113.456	91.8217	11.0834	223.431	13.6209	63.3632	0.1914	1.70337e+09	0.3663	1807.61	61.0587	-52762.2	-17.067	-4.749	-1.7167	0.6622	0.2855	1.0573	1.2829	0.8348	0.8122	0.9945	0.965	-0.2852	0.7539	0.3006	4.1869	0.2293
A81	0.6677	30.4185	42.1563	41.2872	46.053	38.0468	46.5131	14023.7	29.7737	0.8059	6169.72	0.2005	47120	569.138	1056.46	19358500154.2447	4.677	143.982	10.6046	2375.29	157.387	785.796	734.046	248.661	2046.91	70.2644	852.714	2.4799	26803955575.723	0.0583	57168.5	427.828	712730	10142.2	238.06	27.508	0.7829	3.3747	3.1536	16.7349	0.4044	0.3328	0.996	0.9639	-0.1628	0.8706	0.3342	20.1695	0.0071
A82	0.5296	63.1158	119.833	111.986	145.653	142.039	148.144	447618	83.3795	0.4517	57083.2	0.1348	445283	473.959	849.064	191004862757.697	4.5602	207.117	2.8851	1347.72	121.827	653.05	639.021	113.439	1213.74	87.461	674.269	0.4739	180813846264.141	0.0441	18265	583.177	99552.5	679.349	120.201	1.7959	0.9642	1.1213	1.8851	1.5	0.5975	0.5778	0.9987	0.9779	-0.4458	0.9909	0.4627	23.1908	0.0107
A83	0.7666	8.9797	8.9588	17.3623	12.0276	7.8156	17.1288	25713.5	9.5387	0.7914	627.297	0.7047	-3190.99	1416.24	1870.93	-7.08596e+09	4.7432	253.645	2.7485	2001.69	133.495	1626.41	1601.36	976.676	1015.3	106.534	1626.71	-0.159	2197984353.0147	0.0438	26047.8	794.962	89238.5	233.77	141.481	22.2937	0.7061	3.7814	3.3238	8.5728	0.3059	0.2327	0.9859	0.9164	-0.2339	0.9439	0.2387	27.7983	0.0069
A84	0.7349	25.6986	37.1674	43.3046	44.0715	39.428	41.525	18954.6	33.9453	0.5949	5785.16	0.317	33567.6	498.5	1083.27	9468577498.4995	4.784	158.48	8.3141	2407.59	192.609	728.487	622.864	131.832	2202.8	85.929	736.919	2.2783	-1.1352e+10	0.067	74801.3	660.863	1.63102e+06	20831.3	415.334	24.7722	0.8891	3.0504	3.0838	16.6812	0.4244	0.3723	0.9971	0.9708	-0.2387	0.9318	0.3504	22.4926	0.0062
A85	0.2987	16.4409	62.1168	94.3014	52.179	139.863	205.179	8274.89	31.0529	0.4522	4607.68	0.4479	388.397	455.027	1191.19	-1.39769e+09	5.6506	394.552	7.1291	3256.85	238.861	842.142	819.45	36.2129	3232.64	164.688	927.93	1.2805	13185839633.5529	0.021	109458	1109.25	1.55767e+06	10868.8	480.132	55.1509	0.8151	4.8772	3.7419	28.5475	0.3095	0.2092	0.9973	0.9646	-0.2002	0.9433	0.2318	32.4028	0.0019
A86	0.2892	15.49	59.9657	92.1648	50.2166	140.556	202.026	8749.46	28.1088	0.4618	6417.32	0.4299	11648.4	455.659	1217.51	-9.51611e+08	5.584	383.399	7.0895	3329.51	243.743	882.085	808.689	11.5314	3234.3	164.108	941.479	1.2468	-6.17341e+09	0.0218	106926	1095.36	1.55283e+06	10290	509.352	51.4561	0.8096	4.7838	3.8173	29.3804	0.3025	0.2352	0.9973	0.9661	-0.2093	0.9422	0.2218	31.6775	7e-04
A87	0.8285	17.9216	19.3639	25.0147	20.7397	22.8956	23.8362	6162.2	21.8547	0.7365	2117.86	0.3713	3604.15	587.244	951.043	-1.98087e+10	4.448	167.893	5.7162	1421.78	108.007	777.136	735.96	383.836	1051.43	67.5102	800.306	1.0461	1446039273.1218	0.055	20856.5	200.428	96895.6	923.954	98.0563	8.6363	0.812	2.5613	2.6885	5.0677	0.4317	0.3616	0.9945	0.9477	-0.2015	0.8949	0.3558	14.5772	0.0084
A88	0.4757	10.547	20.5747	29.4307	21.4104	32.7318	31.696	3482.49	18.2518	0.551	902.577	0.6877	-2483.73	446.844	892.938	12539777301.6763	4.4331	220.553	2.3104	1084.23	116.704	667.832	609.953	328.335	709.396	86.8467	620.453	0.2306	-1.99962e+09	0.0517	22518.3	207.814	-33264.4	239.946	98.2507	15.9321	0.6947	3.2444	3.1365	6.8797	0.3617	0.2849	0.9803	0.9043	-0.1635	0.848	0.2768	12.3146	0.0066
A89	0.4684	10.4258	22.3979	29.2426	24.5276	23.7735	29.5456	6548.05	18.3046	0.5465	3995.5	0.7046	13626.8	459.753	826.596	2356443773.2465	4.4417	212.636	2.2147	989.418	116.972	638.09	640.138	312.257	743.787	87.4252	639.296	0.1898	12423215507.7155	0.0494	17991.2	210.133	88008.7	423.688	111.064	16.37	0.6952	3.1134	3.0585	5.9605	0.3575	0.2628	0.9804	0.9053	-0.1583	0.8401	0.2723	11.4049	0.0033
A90	0.5328	21.0963	39.6839	44.6493	35.3551	47.1937	52.7579	3718.63	25.8228	0.6193	1724.38	0.3077	40033	561.062	1102.11	-1.78068e+09	5.1874	288.113	5.662	2228.51	176.837	823.967	822.935	261.995	1977.58	113.247	860.035	1.0857	3867361409.1433	0.0354	55593.1	647.163	482773	5610.42	280.719	36.1816	0.7716	4.5837	3.6794	13.7178	0.2895	0.2271	0.995	0.9491	-0.1489	0.8744	0.2153	22.7286	0.0018
A91	0.5655	59.3804	104.206	97.3068	102.465	114.551	124.954	274745	65.1038	0.5448	40167.1	0.1285	281105	820.55	1456.32	377849183950.805	5.2538	330.547	2.8784	2160.35	195.042	1079.93	1073.76	267.487	1919.72	140.992	1136.98	0.2678	356097145502.501	0.0322	55898	1253.29	319661	2011.25	349.642	10.7237	0.9353	2.3831	2.7873	5.833	0.4325	0.3748	0.9982	0.9714	-0.3213	0.9759	0.3596	34.2201	0.0029
A92	0.6057	30.048	53.666	47.3646	55.7749	51.8969	66.2878	57745.9	36.963	0.6926	7603.07	0.2151	38283.5	98.8536	154.959	7809204735.4131	1.7178	29.8205	2.6532	211.499	17.4041	104.509	109.824	41.2998	65.1089	6.95	88.0797	0.4011	-2.30998e+10	0.3549	1869.59	-20.09	11026	180.465	-16.7656	-0.181	0.8505	0.1679	0.7207	-0.2524	0.9154	0.9189	0.9949	0.9746	-0.5264	0.9147	0.1867	3.1161	0.2556
A93	0.7853	22.4806	24.4575	33.3116	36.3572	26.4677	28.0383	89.8872	24.5078	0.7414	3718.94	0.3211	34819.4	545.806	752.585	12718053831.1715	3.9172	120.661	3.1346	995.012	62.6407	662.17	645.322	336.701	611.192	46.836	646.51	0.0101	11265356632.3145	0.0822	7865.36	259.562	7390.04	-225.112	39.1833	14.1325	0.5468	2.2943	2.8466	4.5976	0.4028	0.3035	0.9843	0.9154	-0.0695	0.6518	0.328	12.5213	0.0087
A94	0.6734	14.3032	22.1544	30.7149	26.5112	29.2279	27.9485	10272.4	20.1	0.7482	1406.93	0.3581	268.485	323.316	425.398	-1.96653e+09	2.5592	48.3592	4.143	555.829	28.5122	361.91	353.827	233.556	263.391	18.7923	366.522	0.581	13673932111.702	0.1927	-651.533	-30.2249	-22664.6	-60.8685	-13.3061	0.6255	0.7151	0.7294	1.4935	-0.5038	0.6752	0.6583	0.993	0.9486	-0.2336	0.8089	0.501	5.5234	0.0623
A95	0.8809	10.2294	15.288	11.142	13.6548	17.6043	14.3635	51.5399	11.1554	0.8055	-210.687	0.6192	-40368.9	605.756	1023.44	-4.34554e+09	4.801	273.122	2.2221	1288.65	143.244	811.227	823.35	394.948	881.86	111.801	823.315	0.1413	-2.00334e+09	0.0414	30638.9	320.227	85850.5	424.251	183.814	9.1431	0.8683	2.5951	2.6948	3.4077	0.3758	0.3075	0.9918	0.9364	-0.3063	0.9705	0.309	17.354	0.004
A96	0.3786	18.9472	43.609	45.7966	39.3528	46.5308	45.4663	-3003.15	25.0925	0.6035	2024.81	0.3697	20410.5	371.769	579.751	1753502118.1066	4.0811	121.627	3.5488	1007.98	77.8429	474.209	446.146	145.631	814.49	51.9399	527.404	0.2781	20533236861.1578	0.0737	10994.6	246.685	-14906.2	408.817	41.3794	8.7611	0.624	2.5932	2.8018	5.2683	0.4028	0.3113	0.9904	0.9323	-0.1095	0.7172	0.3353	15.1826	0.006
A97	0.4595	18.4432	41.8192	43.7753	38.2669	31.2167	44.9632	20528.1	23.9098	0.6062	3672.82	0.3592	-2879.61	291.75	1126.06	11398529530.1228	5.6184	417.983	3.1188	1929.84	242.76	739.654	706.731	53.2728	1889.23	173.358	731.893	0.4238	1707106865.4017	0.0204	94159	849.8	896938	4896.48	561.778	64.6038	0.7868	5.4085	3.8899	34.8883	0.283	0.2187	0.9902	0.9405	-0.1955	0.9356	0.2293	28.5899	0.0016
A98	0.6576	12.7956	20.0097	23.2218	23.404	25.9712	26.8122	7036.99	19.845	0.7534	5035.45	0.3991	-11537.7	982.844	1285.27	15048349199.3102	4.3614	153.734	4.2971	1579.65	92.7934	1107.13	1128.33	607.037	1030.99	62.3322	1141.88	0.3033	-6.39704e+09	0.0577	15981.3	456.222	11265.8	420.744	82.0383	9.9363	0.7517	2.4913	2.834	4.5601	0.4307	0.3436	0.994	0.9466	-0.172	0.8575	0.3343	22.9539	0.0072
A99	0.4996	30.6941	64.5346	79.6078	48.742	88.3252	85.9515	75593.5	47.2057	0.55	13955.3	0.2299	76018.4	390.707	525.922	29707024430.8394	3.2102	64.6642	3.2848	703.417	39.339	437.827	457.993	240.984	469.786	36.4703	411.029	0.1934	13518703505.6335	0.1271	9395.32	110.932	-34180.9	257.477	0.6657	2.6014	0.8654	0.8699	1.5753	1.2478	0.6962	0.6813	0.9977	0.9693	-0.3596	0.9417	0.4569	9.1386	0.0384
A100	0.8759	27.3573	30.263	34.1628	43.0317	30.3204	36.7921	16869	26.1914	0.7263	6364.77	0.2798	53909.8	541.959	1036.97	3159006050.1827	4.7727	183.295	4.8839	1649.33	144.139	729.349	732.616	266.402	1345.52	88.0639	773.154	1.3775	17382885944.581	0.0477	38435.9	492.346	252305	4642.94	217.71	7.8213	0.9302	1.9843	2.6181	3.1168	0.4914	0.4194	0.9973	0.9647	-0.303	0.9662	0.3867	19.081	0.0125
A101	0.4854	40.6892	80.143	100.457	101.823	114.915	149.09	134275	65.9258	0.6146	22609.7	0.1425	123164	184.031	393.117	-2.63432e+09	3.4849	119.363	2.5418	537.217	60.3728	225.578	217.891	38.5285	450.711	47.6361	288.577	0.4215	-8.31993e+09	0.0989	4985.33	65.4949	-2163.02	-4.9993	16.4824	1.1808	0.9304	0.5684	1.5483	0.6401	0.7228	0.7217	0.998	0.9701	-0.4397	0.98	0.4211	9.0341	0.0362
A102	0.4484	45.3405	99.4544	223.556	71.8061	222.356	227.954	103291	60.3074	0.5739	19662.8	0.1667	115359	358.671	855.075	40500154933.2029	5.0117	233.695	10.1431	2245.81	164.831	574.346	542.026	-1.7219	2296.94	98.5243	651.58	2.1745	19838028617.2329	0.0448	64157.5	624.662	1.08475e+06	11995.7	312.892	15.3475	0.8988	2.7666	2.9984	9.6719	0.4285	0.328	0.9978	0.9708	-0.2292	0.9463	0.3386	24.7131	0.0043
A103	0.3556	47.3996	135.529	100.943	91.6382	190.906	232.477	117984	58.4968	0.5371	24812.2	0.1721	135512	561.938	863.953	106517462568.59	4.3791	155.426	6.252	1693.15	105.853	696.096	697.961	126.999	1527.15	61.1476	690.782	1.0665	71106438257.3989	0.0616	17118.6	636.189	92357	1375.58	98.7811	4.4816	0.9135	1.5276	2.3335	3.0511	0.5261	0.4875	0.9984	0.9757	-0.3063	0.9608	0.4283	25.1233	0.0098
A104	0.6557	15.7084	25.2464	23.8652	29.3585	25.627	35.7471	-8292.61	22.5882	0.6964	2679.97	0.4099	7273.18	272.344	576.398	-4.27209e+09	3.9211	148.093	2.8966	724.764	92.994	379.136	349.572	208.429	519.399	67.3711	377.875	0.8496	6545036825.7122	0.0889	17858.3	144.28	-74014.9	302.611	44.7018	6.5554	0.7765	1.7788	2.5896	2.9637	0.5209	0.4659	0.9877	0.9309	-0.2014	0.856	0.3769	8.4583	0.0242
A105	0.7724	18.225	16.9939	37.8114	35.4386	22.4408	39.3777	10202.6	15.8891	0.5994	550.332	0.6577	21553.9	463.338	831.654	14602325441.6209	4.585	227.034	2.1712	1159.71	117.24	639.45	649.73	284.778	784.554	93.7839	672.158	0.3207	-2.69277e+10	0.0479	20432.5	217.818	42867.1	407.327	117.957	6.256	0.8642	2.0522	2.6525	3.1187	0.4295	0.3378	0.9929	0.9392	-0.2743	0.946	0.3496	15.4835	0.0087
A106	0.7371	61.0648	81.0123	184.036	200.644	96.7576	209.139	238182	70.566	0.7705	23918.2	0.089	246962	787.711	1526.2	365107105536.514	5.5556	386.283	2.6067	2167.69	229.942	1192.39	1207.2	189.761	2009.65	160.783	1210.8	-0.4068	347698601040.953	0.0252	78478.4	1688.5	679519	-4257.75	495.201	18.3932	0.9222	3.3112	3.2213	9.0231	0.3775	0.2691	0.9971	0.9616	-0.2607	0.9625	0.2953	40.3093	-0.0031
A107	0.7939	56.6683	71.3534	77.2719	77.2559	82.597	95.1594	157372	58.1013	0.7707	16300.4	0.1182	144983	484.474	773.909	59369271477.0329	3.9575	109.1	3.3327	1045.58	71.9499	656.506	645.174	134.311	851.854	48.4465	648.483	-0.2163	68726046345.5034	0.0755	7695.59	414.787	47717.1	-530.686	42.5646	1.1733	0.9089	1.1745	1.8656	3.4381	0.5876	0.5689	0.9977	0.9678	-0.3416	0.9494	0.4801	21.0496	0.0172
A108	0.6721	57.8591	82.5409	101.908	108.818	103.362	132.168	179585	71.2805	0.5605	27562.6	0.1601	174189	437.228	1069.84	95545960938.5554	5.1244	239.75	6.0956	2298.89	189	699.308	590.077	105.677	2144.77	107.839	736.308	1.624	114574777267.708	0.0352	74151.8	670.16	857449	9996.01	331.112	37.8734	0.806	3.6319	3.3267	23.7453	0.4115	0.3171	0.9955	0.9646	-0.1998	0.9228	0.3118	24.6136	-0.0001
A109	0.3849	26.2449	65.9654	58.007	89.175	57.6516	96.2941	24496.6	50.0517	0.3833	14642.1	0.3963	45890.3	453.52	883	12364967237.3499	4.7258	215.101	3.7089	1383.5	131.835	606.041	609.076	196.166	1162.68	93.1336	621.162	0.7724	10346165581.7602	0.0418	35081.4	310.667	39414.8	1432.17	148.272	14.0118	0.8292	2.7598	2.9104	4.1639	0.4007	0.3373	0.9944	0.9475	-0.195	0.9032	0.3173	16.6631	0.0084
A110	0.6602	45.2531	72.212	76.9257	77.5663	82.4906	91.7753	102445	61.6415	0.6697	20498.2	0.142	97488	419.216	755.638	68007032553.4116	4.3699	175.038	4.739	1560.1	104.584	562.895	599.182	158.554	1390.8	65.0731	591.904	0.9402	62753078954.8194	0.055	20829.3	357.985	4439.84	910.653	103.354	11.2176	0.8226	2.2271	2.8023	5.0749	0.4491	0.3857	0.9972	0.9644	-0.2037	0.9012	0.3793	17.3953	0.0075
A111	0.4576	17.6986	41.6755	28.519	44.4764	44.1776	50.4419	12604.8	19.6388	0.6035	3085.65	0.4111	24507.9	638.995	1082.47	9371919911.7149	5.0102	214.122	4.5742	1880.42	153.421	836.842	890.022	135.39	1653.36	95.3049	877.465	0.3001	-1.52334e+09	0.0463	46570.8	1013.28	233411	834.069	219.715	36.2729	0.7149	4.1953	3.5691	16.2307	0.3187	0.2398	0.9935	0.945	-0.1584	0.8601	0.2422	30.3948	0.0042
A112	0.6758	32.1208	49.5306	58.0522	50.0438	61.9479	58.2217	53365	39.3759	0.7197	7214.86	0.1919	16471.6	947.673	1286.83	59644257141.1793	4.6238	160.896	6.9886	2228.98	111.916	1096.17	1057.22	538.588	1659.57	68.0095	1161.96	1.3799	51861526841.951	0.055	23696.7	697.551	35159.8	1896.29	124.051	15.7371	0.783	2.6423	2.8743	9.8525	0.424	0.3479	0.9967	0.965	-0.1943	0.9036	0.3531	25.5499	0.0067
A113	0.3336	38.5795	117.541	133.751	135.559	90.74	140.111	44597.3	64.5762	0.2652	33669.3	0.469	65504.2	556.83	1087.38	56553637032.4323	5.0414	286.302	3.255	1555.03	168.273	805.022	831.417	193.604	1488.06	120.229	839.033	0.2559	62632764880.6016	0.0321	43614	700.665	221422	1231.04	236.849	17.5509	0.8719	2.9204	3.0934	6.9637	0.3825	0.3081	0.9955	0.9544	-0.2399	0.9481	0.3165	25.9398	1e-04
A114	0.3637	51.4515	129.491	153.591	146.121	113.06	161.185	257205	65.3569	0.2433	73250.2	0.314	230878	655.441	1206.95	224653943616.575	4.9717	251.294	5.9629	3896.5	148.308	883.36	865.191	80.3157	3690.5	97.4215	923.132	0.9186	199029574090.685	0.0421	33744.1	1118.67	153891	2618.56	242.457	21.2825	0.8139	3.1015	3.2446	12.0202	0.381	0.3029	0.9988	0.9801	-0.1937	0.9102	0.3255	32.0386	6e-04
A115	0.8024	54.8511	58.4829	103.245	86.1327	80.8442	109.377	124327	50.537	0.405	30136.5	0.2183	139067	537.026	696.443	54357804460.5751	3.5718	92.5239	3.7256	989.876	56.191	590.223	610.014	179.376	667.198	40.5323	643.467	-0.1987	45435714084.8141	0.0983	5007.07	202.758	23404.7	243.479	13.6058	4.858	0.8083	1.1972	1.9967	1.2614	0.579	0.5632	0.9963	0.958	-0.2424	0.905	0.4556	18.4059	0.0217
A116	0.2007	36.1841	175.183	63.9886	34.451	154.013	150.921	22228.1	68.0314	0.474	517.244	1.056	3972.97	860.565	1678.67	-1.53807e+10	5.4932	409.16	2.7397	2217.04	236.255	1285.29	1158.85	639.624	1586.7	168.958	1317.45	0.5245	-9.10525e+09	0.0252	92028.6	765.95	524349	5567.85	434.013	65.8613	0.7319	6.409	4.1134	25.7514	0.2492	0.1382	0.9856	0.9168	-0.2857	0.9746	0.1594	25.9739	0.0027
A117	0.7671	79.5932	105.436	124.62	141.742	115.858	146.696	546637	108.749	0.5895	54477.3	0.1025	563644	244.986	468.621	70539271059.4455	4.0236	116.854	4.5425	1197.4	72.9684	404.204	372.854	39.4121	1170.03	53.125	382.902	0.527	83635504027.1112	0.0753	9732.34	256.647	-93983.2	180.304	65.3841	2.6963	0.8912	1.1933	2.1454	2.172	0.5767	0.5369	0.9987	0.9745	-0.3037	0.9528	0.4596	15.3342	0.0137
A119	0.8516	25.5418	33.928	37.6939	35.8791	39.2423	44.5529	21799.7	30.4991	0.7316	5249.2	0.2423	30280.9	464.28	649.322	-1.29287e+10	3.3926	80.439	4.5774	936.963	59.9835	602.195	517.243	384.144	604.261	34.939	564.783	1.3541	-1.67991e+09	0.1238	6238.32	42.7563	17458	432.061	25.5058	4.3568	0.8115	1.1451	2.0101	1.2673	0.58	0.5689	0.995	0.9559	-0.2335	0.8821	0.453	7.6171	0.0327
A120	0.1936	15.0079	75.9454	33.4338	82.4697	25.3268	100.468	5415.81	26.8646	0.6707	4927.81	0.3817	-6084.79	392.716	1150.22	-2.97773e+10	5.1895	385.753	3.7995	1966.29	239.426	717.119	601.78	112.549	1847.36	161.887	789.942	1.1896	-1.72902e+10	0.0335	92123.7	658.428	842494	13042.9	437.799	40.4677	0.8435	4.6751	3.6442	17.1634	0.3118	0.2191	0.9935	0.9448	-0.1939	0.9159	0.2257	22.4931	0.0043
A121	0.7443	53.2648	74.6671	67.0776	88.6567	76.1277	82.2254	166181	59.9542	0.7367	18321.8	0.1202	150951	690.489	1117.08	138359870563.906	4.6014	172.577	4.1852	1739.52	114.759	877.742	857.277	339.086	1335.73	81.314	890.503	0.7782	111452416462.983	0.0523	22749	486.393	107322	1152.92	108.576	13.6425	0.8074	2.8068	2.9991	6.6505	0.4024	0.3073	0.9959	0.9536	-0.167	0.8749	0.3127	22.5149	0.0029
A122	0.7075	38.5449	52.79	61.9365	56.0796	64.768	68.4854	57240.3	48.6776	0.6101	13835	0.1937	85161.1	317.063	470.72	4023733184.2517	3.2589	67.27	5.9004	948.124	43.3283	361.161	359.035	116.939	766.165	31.1197	365.915	0.7273	7.05949e+09	0.1319	3774.42	114.113	-111779	262.6	-0.3606	1.1224	0.8508	0.815	1.6854	0.5029	0.668	0.6269	0.999	0.9741	-0.3027	0.9097	0.4747	11.7135	0.0375
A123	0.2765	37.0434	130.427	127.754	58.1419	120.316	139.417	59304.6	48.1679	0.3749	16787.8	0.3247	70476.1	505.054	1746.34	105700192933.239	6.0791	571.563	2.9087	2775.66	351.389	1201.66	1319.49	9.8299	2769.24	253.392	1320.42	-0.4962	102947003690.004	0.0157	194336	2666.97	3.76088e+06	-20150.7	1204.58	67.9975	0.8863	5.8105	3.9901	30.1768	0.2896	0.1876	0.9945	0.9517	-0.2056	0.9491	0.1917	49.047	0.0025
A125	0.6807	70.0218	103.002	99.0612	115.196	123.653	128.064	374616	81.9532	0.579	45725.3	0.118	382758	596.112	912.952	239061377708.828	4.2393	133.168	4.7988	1590	92.7689	727.044	736.586	312.921	1182.62	62.3865	717.303	0.712	237708229804.805	0.0667	13481.5	270.005	-16608.7	472.71	100.987	3.4174	0.9142	1.4045	2.1143	2.1881	0.5638	0.511	0.999	0.9752	-0.3293	0.9692	0.4578	18.0301	0.0105
A126	0.5012	14.516	30.5039	48.1832	24.9755	49.3555	46.252	-8824.27	19.1983	0.5058	498.838	0.6259	13689.5	296.873	492.084	-5.47368e+09	3.477	91.9916	3.4223	609.435	56.7971	435.404	400.057	190.686	545.944	32.8648	411.555	0.5853	1075689592.6374	0.1095	3788.84	114.428	53877.2	-47.705	22.2237	2.617	0.7831	1.1026	2.0869	0.7232	0.5642	0.5444	0.995	0.952	-0.2412	0.8684	0.4763	10.6649	0.0258
A127	0.1803	21.8901	112.552	32.7999	48.4826	49.1593	101.695	18574.5	24.6183	0.4982	7855.35	0.3853	-5187.13	460.486	862.353	5270485435.7865	4.4175	181.873	4.1623	1281.39	110.76	636.968	588.041	140.176	1164.04	76.7732	634.334	1.1936	5360641434.7042	0.0707	24117.2	420.947	22622.8	1887.81	129.283	8.3985	0.8512	1.9258	2.638	4.0996	0.5076	0.4503	0.9968	0.9626	-0.2433	0.9248	0.4074	20.1832	0.0173
A128	0.7852	28.6551	43.8083	41.8205	43.2133	39.0196	42.7188	12001.8	29.2802	0.7058	5430.52	0.2546	13761.9	495.867	762.065	12961938722.9553	3.785	110.555	6.6705	1216.76	74.0939	621.371	568.966	348.375	900.995	45.2161	604.853	1.6673	21955393188.9084	0.0889	13532.8	127.686	70652.6	821.364	51.949	6.1705	0.8644	1.5326	2.3275	2.9838	0.5723	0.5192	0.9964	0.964	-0.2653	0.9216	0.4262	10.6468	0.0212
A129	0.4184	52.9567	123.936	157.65	109.922	217.508	227.942	256045	73.0569	0.3719	51145.3	0.2064	276131	438.736	797.651	108687986683.768	4.6283	190.022	3.2424	1279.76	125.639	622.62	636.015	43.3738	1316.47	75.0526	590.474	0.526	134736011345.311	0.0522	19749.3	570.412	27707.5	558.004	130.617	6.439	0.8753	2.0416	2.5876	3.7373	0.4458	0.3742	0.9969	0.9617	-0.2663	0.9345	0.3743	24.5481	0.0099
A130	0.7637	58.3574	80.3587	91.338	90.2271	94.9744	96.977	206429	68.862	0.6339	29372	0.1391	178253	588.056	904.919	120785566449.259	4.3948	159.073	10.5401	2194.33	114.028	732.225	729.03	83.1774	2015.85	68.3819	768.191	1.8905	128983402561.623	0.0614	28587.9	846.31	183930	2433.17	132.888	7.3707	0.8862	1.8279	2.4546	5.6119	0.5338	0.4927	0.9986	0.9807	-0.3008	0.9516	0.4272	26.6366	0.0096
A132	0.8106	52.0003	60.1905	68.5158	78.6336	69.8782	75.8106	138952	52.7247	0.6622	20045.3	0.1325	101166	605.05	897.209	78791958055.5778	4.2564	124.195	7.6896	1766.23	101.923	727.33	677.714	226.141	1597.48	59.2026	760.246	1.7273	84111662140.3378	0.0752	24778.5	358.917	165195	2083.02	113.522	6.7298	0.8853	1.4949	2.3174	2.8766	0.537	0.4952	0.9986	0.9771	-0.2904	0.9434	0.4247	20.4896	0.0153
A133	0.7578	27.8177	35.718	40.7288	35.6223	50.3413	51.0748	38120.7	33.1919	0.6099	4551.98	0.2947	40285.2	1356.85	1934.97	57235428940.7246	5.1484	294.019	6.2905	2527.88	188.524	1583.06	1565.28	157.032	2432.58	124.829	1598.95	-0.1056	56527248311.1174	0.0351	63124	3427.5	781259	-225.903	353.341	21.6144	0.8797	3.3199	3.3398	11.7532	0.3612	0.265	0.9975	0.9663	-0.2209	0.9402	0.2831	58.8206	0.0045
A134	0.6687	19.0861	32.5778	37.9182	34.5569	36.5284	37.8245	-3553.57	21.0971	0.5802	4431.9	0.4121	-3386.77	908.042	1263.24	8330207618.7071	4.4928	157.892	3.9183	1750.44	111.533	1094.95	1123.71	390.102	1303.22	71.7796	1098.07	0.2648	10857937168.8908	0.055	20599.5	892.713	134975	122.867	125.177	11.9515	0.8396	2.395	2.7943	4.0342	0.4339	0.347	0.9968	0.959	-0.2128	0.9157	0.3553	29.8241	0.0037
A135	0.1679	18.6213	117.076	27.1282	28.464	70.6432	85.2217	3428.62	19.4023	0.5346	2112.87	0.4427	28107.7	523.686	1108.62	-8.94524e+09	5.0604	217.751	4.4187	1731.29	173.724	825.472	745.252	298.27	1392.18	104.608	805.574	1.2959	-1.72548e+10	0.0363	54333	470.215	410751	5174.02	258.123	22.2545	0.8293	3.255	3.3205	12.8121	0.4154	0.3578	0.993	0.9496	-0.2317	0.9358	0.3288	19.6605	0.0047
A136	0.5586	52.8826	92.2923	138.669	78.2862	130.263	148.192	208816	62.8902	0.4181	37614.2	0.2214	183481	250.056	445.235	37270416602.2659	3.8942	108.879	4.3664	1669.7	69.0301	405.815	403.801	64.8627	1639.57	47.0519	382.894	-0.1191	18221067902.3659	0.0841	6912.14	210.221	69078.2	-9.3468	62.0973	1.3175	0.8974	1.1004	1.9505	2.6112	0.5893	0.5468	0.9993	0.9837	-0.3272	0.9522	0.4599	13.5814	0.0219
A137	0.6937	20.3574	29.9013	31.5409	41.479	33.5049	40.9322	-25061.7	25.7899	0.5971	5837.76	0.362	16676.9	219.948	998.275	20594744140.4194	5.3523	382.491	3.6606	1676.92	240.721	518.569	452.052	38.812	1691.45	168.226	606.844	1.1223	-3.01742e+09	0.0321	92385.7	457.212	659040	10697.7	430.488	39.094	0.8246	4.2758	3.6172	19.8215	0.3347	0.2722	0.9921	0.9417	-0.1982	0.9197	0.2659	19.5103	0.0034
A138	0.636	11.4592	15.136	20.246	19.988	18.0694	28.6044	-3481.37	17.7369	0.5773	3080.36	0.7107	14530.7	946.139	1477.97	18894462427.9392	4.9358	254.07	2.9735	1794.22	159.809	1180.28	1186.82	663.003	1116.77	114.768	1245.18	0.0822	-1.07439e+10	0.0371	43165.3	533.356	139194	897.754	219.432	23.3908	0.8193	3.5789	3.1991	7.6561	0.3457	0.2512	0.9916	0.9351	-0.2505	0.9535	0.2548	22.6408	0.0055
A139	0.1507	17.6452	102.409	22.1314	23.5862	26.1266	115.914	37079.2	18.2313	0.6524	3509.24	0.4703	-5993.94	786.158	1248.27	14624079042.7642	4.7713	209.545	3.7043	1668.18	137.181	965.84	957.152	259.157	1461.63	92.3892	1015.68	0.6406	-9.57772e+09	0.0478	33329	808.786	23929.2	1096.02	147.519	12.6804	0.8234	2.6328	2.977	6.5154	0.4167	0.3212	0.9957	0.9552	-0.2327	0.9233	0.3311	29.0246	0.003
A140	0.7112	55.884	82.1057	98.1107	88.6067	95.6554	101.856	242722	68.1588	0.5478	29724.3	0.1479	203167	519.041	728.647	78388308484.7078	4.0423	87.3435	8.5329	1640.68	79.1628	643.34	636.379	206.898	1293.49	43.0816	605.99	1.9013	79224393994.965	0.09	13565.6	377.894	90505.2	841.845	61.9796	1.4257	0.9121	1.1077	2.0359	1.0962	0.6048	0.5672	0.9991	0.9788	-0.3505	0.959	0.4435	19.0306	0.0237
A141	0.4183	32.7194	65.2864	76.7427	76.3673	80.6587	108.952	61727.4	45.0235	0.4868	12621.4	0.2536	52746.4	566.685	1018.72	32282548386.0753	4.8967	259.892	4.5174	2514.51	155.089	791.838	763.063	256.954	2162.51	111.15	814.192	0.7647	49931871921.5128	0.0391	37732.6	543.219	219026	2092.95	192.759	6.6692	0.9399	1.6723	2.4287	4.3075	0.525	0.4366	0.9996	0.9816	-0.3421	0.9749	0.404	22.0367	0.0057
A142	0.6596	28.2438	46.6737	42.6752	50.7877	39.2564	50.2679	10506	29.1614	0.6188	5037.51	0.2778	68985.1	629.749	1041.41	10289845879.5952	4.7002	205.674	4.0801	1663.45	131.334	832.001	820.404	178.327	1483.66	92.9413	840.766	0.6555	6334412430.1773	0.0471	30847.1	774.423	52591.6	1175.7	142.335	13.6195	0.8477	2.4566	2.8831	5.7464	0.4143	0.353	0.9964	0.9613	-0.2217	0.9292	0.3558	26.4993	0.0049
A143	0.7095	28.57	38.2964	49.3361	51.5041	52.1687	50.5452	34653.7	37.2095	0.8042	7407.52	0.181	34083.6	538.3	1469.86	25353104469.3594	5.6494	431.327	4.3099	2689.64	302.497	907.492	757.871	187.663	2468.18	192.197	976.549	1.3217	31658482041.6599	0.0282	153281	993.95	3.32382e+06	36260.7	848.272	52.0962	0.8791	4.9836	3.8108	25.0404	0.2975	0.2075	0.995	0.954	-0.1841	0.9262	0.2159	29.1705	0.001
A144	0.6046	40.6055	64.0794	61.8928	68.7018	76.7448	74.1937	75217.3	50.2091	0.7866	11682.4	0.1282	93148.7	586.898	821.087	55169222199.5458	4.3073	150.259	10.9646	1828.33	103.709	720.448	731.239	153.598	1615.69	61.1048	718.897	1.8445	44314489450.2588	0.0643	22639	529.249	124619	3028.9	143.311	11.4214	0.8505	2.3258	2.7117	5.6387	0.4379	0.3784	0.9975	0.966	-0.2162	0.9063	0.3625	23.0329	0.0074
A145	0.2924	18.1325	60.5112	55.5454	39.9644	60.372	59.3086	31866.7	23.2913	0.4953	1245.71	0.4649	3481.56	157.717	690.934	4726663254.1984	4.9573	248.439	3.4542	1136.9	156.983	379.251	342.279	7.1906	1061.04	109.187	434.981	0.8117	11112364668.1031	0.0364	36677.2	281.392	183811	2754.26	188.154	22.1473	0.8151	3.3115	3.2423	9.4163	0.3824	0.2976	0.9907	0.9359	-0.1991	0.8986	0.2901	15.2895	0.0045
A146	0.7659	51.0638	64.0441	72.11	68.705	66.8988	73.7008	119838	57.8762	0.8417	14584.4	0.1112	128872	468.405	808.767	31980755564.0167	4.4192	166.773	4.2089	1466.42	104.364	618.797	636.439	184.97	1142.42	68.7992	616.201	0.4402	54528991447.8333	0.0566	22015.8	398.243	115393	213.124	101.106	3.0223	0.9009	1.7077	2.4109	2.4209	0.5174	0.4612	0.998	0.969	-0.3014	0.9626	0.4211	19.139	0.0054
A147	0.7844	38.6284	47.5964	51.6456	59.3733	54.1498	63.5192	67391.3	44.1709	0.8436	10797.7	0.1574	83414.6	250.39	558.113	-1.16501e+10	4.1558	146.676	4.4339	1193.91	100.942	406.982	320.727	46.4291	1131.63	60.5592	425.575	1.3027	8490166088.9323	0.0742	16885.6	196.411	-46618.7	1063.67	107.055	9.2447	0.8179	2.0961	2.6339	4.4236	0.4807	0.4401	0.9965	0.962	-0.204	0.8895	0.4004	13.7577	0.0115
A148	0.7091	31.9322	40.8407	45.8908	43.6004	47.2855	47.9812	39734	33.5483	0.7611	6928.18	0.2187	24571.2	632.368	934.367	18823540495.0521	4.3757	140.975	7.1109	1608.23	93.9859	781.697	816.125	276.879	1441.2	59.978	780.333	1.1677	12144178986.6046	0.0632	20943.2	532.794	5469.92	1220.5	92.882	7.8093	0.8542	2.1615	2.6453	5.0177	0.4633	0.4138	0.9977	0.9667	-0.2346	0.9268	0.3888	23.0209	0.0091
A149	0.5577	41.3362	72.7106	45.0155	103.365	172.706	177.753	22762.5	48.1887	0.6182	7300.15	0.2448	35240.7	448.172	1076.6	25239685377.7763	5.2995	378.445	2.7446	1934.85	212.938	792.032	765.876	-8.0767	1937.13	161.359	820.773	0.2907	34067825609.5069	0.0256	68355.4	1102.16	457442	1439.35	386.829	24.7138	0.8822	3.5008	3.3051	12.7254	0.3947	0.3205	0.9957	0.9588	-0.2473	0.9615	0.3034	32.1639	0.0023
A150	0.611	60.6431	96.4897	110.967	109.955	89.1587	121.003	310386	77.9102	0.7436	27218.7	0.1025	302961	347.179	761.646	71884426337.8863	4.8158	215.482	4.4535	1569.51	126.745	529.767	542.844	1.7035	1557.3	86.9045	537.603	0.5	112900188571.824	0.0452	27895.7	579.357	169735	959.762	162.917	15.4493	0.8606	2.6409	2.8981	5.7164	0.3959	0.3053	0.9971	0.9627	-0.2123	0.916	0.3143	22.7728	0.0044
A151	0.6016	30.174	46.8547	60.2904	64.1907	49.5327	62.907	35763.2	44.6533	0.7186	7946.11	0.1877	40848.4	500.805	936.283	14390357564.0285	4.7058	178.633	7.8525	2221.39	139.609	655.125	632.54	223.119	1933.35	79.8706	717.146	1.9594	24337506213.7531	0.0616	45215.3	411.183	363511	5851.58	193.512	26.792	0.7618	3.5405	3.3186	14.4166	0.362	0.2855	0.996	0.9597	-0.152	0.8374	0.2997	18.8316	0.0049
A152	0.1839	21.7229	119.244	35.6024	113.055	97.0307	112.707	24684.5	30.7554	0.5079	5787.62	0.3916	45834	533.992	881.992	7731234410.7874	4.5767	166.439	5.6484	1555.96	117.178	692.818	630.657	104.33	1436.9	76.551	730.075	1.1675	46333187892.6508	0.0624	23174.9	503.67	112781	1523.65	108.426	9.2566	0.8782	1.8993	2.6934	3.7954	0.4903	0.4062	0.9976	0.9675	-0.2632	0.937	0.3787	22.6312	0.0125
A153	0.8231	56.6345	72.1355	80.9522	79.6817	84.9022	87.0887	194735	65.7744	0.6073	26043.3	0.126	154759	477.553	665.293	78731969808.9972	3.747	91.3294	7.4773	1400	64.536	595.559	564.881	-7.6028	1341.02	38.266	602.632	1.1402	61300947154.2963	0.103	4777.22	575.288	-14873.6	-145.215	38.1636	1.5782	0.8633	1.148	1.9039	1.2109	0.6302	0.5847	0.9991	0.981	-0.318	0.9453	0.4671	23.5981	0.0266
A155	0.6885	56.3889	83.9908	96.4518	84.7237	96.6968	103.711	232908	73.3814	0.5891	30305.2	0.1353	280655	358.511	499.386	27431089524.4936	3.4598	84.1361	6.0059	906.72	45.6421	441.574	452.658	19.267	847.921	33.1531	474.717	-0.4332	86174120393.9121	0.1178	3045.3	351.352	19200.8	-347.932	60.5276	2.8419	0.8303	1.2069	1.9063	0.8677	0.6067	0.5802	0.9986	0.9724	-0.2681	0.8975	0.4743	16.9643	0.0291
A156	0.6607	45.8456	72.8122	68.2188	85.8306	85.5012	85.4546	159036	58.0442	0.6231	22693.7	0.1453	135963	318.512	550.698	10841455868.6905	3.8652	112.465	4.2892	868.383	69.9631	405.524	396.021	14.2649	889.506	51.2772	400.795	0.6318	24188384707.3107	0.0872	9165.67	283.492	-11826.9	-407.781	45.8113	2.5783	0.8914	1.3448	1.9721	1.1776	0.6083	0.5585	0.9976	0.9703	-0.315	0.9461	0.4691	17.775	0.022
[truncated: 801 more columns]

## Sheet: omics features2
name	Flatness	LeastAxisLength	MajorAxisLength	Maximum2DDiameterColumn	Maximum2DDiameterRow	Maximum2DDiameterSlice	Maximum3DDiameter	MeshVolume	MinorAxisLength	Sphericity	SurfaceArea	SurfaceVolumeRatio	VoxelVolume	X10Percentile	X90Percentile	Energy	Entropy	InterquartileRange	Kurtosis	Maximum	MeanAbsoluteDeviation	Mean	Median	Minimum	Range	RobustMeanAbsoluteDeviation	RootMeanSquared	Skewness	TotalEnergy	Uniformity	Variance	Autocorrelation	ClusterProminence	ClusterShade	ClusterTendency	Contrast	Correlation	DifferenceAverage	DifferenceEntropy	DifferenceVariance	Id	Idm	Idmn	Idn	Imc1	Imc2	InverseVariance	JointAverage	JointEnergy
A1	0.7115	81.101	118.575	126.682	126.389	108.588	127.886	596294	88.1123	0.7381	46578.2	0.0774	591987	495.953	1014.22	370204934181.695	5.0266	294.117	2.0951	1478.32	161.446	804.475	809.283	98.8812	1270.21	126.811	776.752	0.2346	361536003286.232	0.0395	39315.8	765.676	105669	243.627	242.68	3.5422	0.9749	1.2014	2.0564	1.3773	0.5756	0.5449	0.999	0.9769	-0.4441	1.0016	0.4575	26.874	0.0054
A2	0.6945	41.0782	62.4304	68.7668	67.3644	54.1222	72.9094	70720.2	46.9497	0.7551	13952.4	0.1388	87650.4	1070.48	1492.02	125519908848.544	4.8342	206.489	4.3098	2028.89	137.527	1252.08	1220.71	537.913	1631.97	85.9106	1245.11	0.5726	139441700889.977	0.0482	37336.4	969.408	180034	1523.43	177.888	14.1568	0.853	2.7257	2.9905	6.9787	0.3969	0.3187	0.9967	0.9601	-0.203	0.9198	0.312	30.1324	0.0056
A3	0.6945	26.4309	36.3405	47.2995	43.2784	38.5215	41.0061	11442.7	31.6358	0.8092	3418.3	0.2354	30837.1	578.468	895.298	20750846806.0697	4.1066	124.273	3.9943	1269.85	81.7835	693.941	709.578	375.411	851.744	57.5732	716.685	0.982	12178368946.1323	0.0763	14346.2	192.36	12011.5	1481.52	42.6259	8.4538	0.8175	1.9377	2.5876	3.2842	0.4841	0.4394	0.9949	0.9543	-0.2198	0.8962	0.4091	15.0407	0.0107
A4	0.5178	67.1545	128.429	148.534	137.132	120.289	159.055	107110	82.6816	0.3942	29357.5	0.2431	134375	75.762	153.01	23333142247.4219	2.2299	37.324	2.7333	252.032	22.2052	145.142	111.162	29.2229	313.148	17.9173	148.185	0.4514	8.96373e+08	0.241	1540.42	41.7941	-388.673	-145.317	16.8325	-0.7925	0.9154	0.0658	0.7715	-0.6898	0.9063	0.9025	0.9983	0.9824	-0.6015	0.9673	0.1783	4.1734	0.1733
A5	0.6525	63.4896	101.238	107.568	103.59	85.6465	101.658	295155	66.6761	0.7653	27568.5	0.0997	291351	417.651	670.401	71880819343.4297	4.0896	92.0351	8.0187	1473.12	89.1173	532.998	462.212	91.1908	1307.85	42.9173	507.246	1.6256	68781510921.2931	0.0818	14043	295.446	53810.7	1570.8	86.7594	2.0079	0.9169	1.2018	1.9884	1.711	0.6242	0.5804	0.9992	0.98	-0.3586	0.9686	0.4552	18.4377	0.0221
A6	0.852	19.054	22.2088	26.702	27.6239	23.9567	32.1181	-11169.2	22.6807	0.8284	1345.77	0.3051	-10802.3	675.482	1027.06	6617157152.9785	4.4328	176.39	3.7772	1469.11	114.475	819.802	791.655	524.86	956.506	76.0417	817.895	0.9657	7262638845.1131	0.0573	22226.9	207.798	97856.1	752.74	97.8247	12.1613	0.7822	2.6021	2.8572	6.5036	0.4399	0.3575	0.9924	0.9434	-0.1993	0.8842	0.3488	13.1797	0.0062
A7	0.2999	14.3071	42.4667	34.8408	50.6167	43.7843	49.4144	-5875	27.8219	0.5779	4412.85	0.3718	7302.84	550.856	921.15	6.36877e+09	4.4901	192.744	2.9266	1196.8	118.336	722.021	711.435	397.992	756.347	83.0993	737.495	0.3518	-1.688e+09	0.0501	17439.6	208.433	35205.3	800.813	97.3703	7.6825	0.8526	1.8742	2.6101	2.183	0.4569	0.3761	0.9936	0.9449	-0.2465	0.9311	0.3742	13.8077	0.008
A8	0.602	15.9873	24.5649	32.0554	38.7036	30.5228	42.8389	11838.2	25.6797	0.6924	2116.77	0.3233	2430.23	656.418	962.256	-6.24243e+09	4.1473	140.101	4.0569	1092.84	93.9978	774.589	795.97	282.992	805.72	60.1302	805.042	-0.3315	23849162170.0248	0.0718	7622.28	554.731	55184.6	-10.0771	78.8088	4.3771	0.8848	1.3128	2.1844	2.22	0.5374	0.5006	0.9973	0.9626	-0.3182	0.9542	0.4425	21.3128	0.0135
A10	0.3987	21.3324	50.2876	62.5106	59.5253	67.4723	65.1904	42914.5	50.5065	0.466	9456.07	0.323	47214.5	643.444	1470.91	44332933145.7801	5.6473	400.577	3.1275	2235.62	254.537	1005.07	1029.82	45.7549	2308.28	169.699	1130.36	0.2054	25151984016.3501	0.0248	104559	1865.31	1.02181e+06	2501.16	549.926	26.6242	0.9099	3.6753	3.4796	13.7084	0.353	0.2607	0.9964	0.9616	-0.2589	0.9714	0.2679	41.2405	0.0073
A11	0.7002	90.9201	130.935	229.903	173.44	234.085	231.608	957914	122.787	0.4439	104182	0.1155	916937	965.641	1739.55	1786386096353.96	5.8656	431.5	3.1957	3040.62	245.338	1330.77	1353.5	56.0389	2943.67	182.493	1378.66	0.4574	1798853311094.27	0.0225	94858.7	3890.37	1.79906e+06	9307.67	774.73	14.3349	0.9687	2.4249	2.8227	6.1554	0.4264	0.3392	0.9989	0.9806	-0.373	0.9955	0.345	59.7727	0.0028
A12	0.5662	47.7081	84.0117	88.127	89.2161	88.6363	91.1056	116922	52.0256	0.5896	20134.8	0.1532	121820	15.4727	154.254	6527022593.0538	2.8541	84.7555	2.0583	362.555	50.6587	87.3814	74.865	-8.4252	312.51	40.195	89.8771	0.4177	14646745280.1657	0.1585	2774.81	5.0188	26913.1	623.594	4.7255	0.664	0.9472	0.3216	0.9283	0.9199	0.8568	0.8568	0.9978	0.9754	-0.5826	0.9743	0.26	4.917	0.0997
A13	0.6118	57.4995	92.1522	98.666	102.769	84.4639	111.583	239315	69.3658	0.729	26006.4	0.108	251879	262.314	279.362	26987010679.777	2.297	27.4132	7.5625	553.804	27.5837	237.791	249.593	131.592	397.813	13.4442	290.369	1.1567	46228218854.2093	0.265	746.48	8.4731	1704.36	438.354	27.2302	-0.5198	0.8988	0.1803	0.8915	0.0957	0.8685	0.8749	0.9987	0.9859	-0.5179	0.9419	0.2564	7.6531	0.1671
A14	0.6821	23.1748	40.6244	37.8471	47.6187	45.7511	45.7926	-1289.32	35.0463	0.7103	7006.87	0.2372	22116.2	1189.6	2007.23	62746825032.3775	5.7106	432.097	2.8075	2525.17	252.869	1578.74	1516.02	291.739	2180.66	182.784	1637.79	0.0085	73807510036.5469	0.0249	93570.6	2771.44	957811	1164.84	559.149	29.2804	0.8869	3.9958	3.4153	12.8977	0.3366	0.2462	0.9962	0.9562	-0.2431	0.9609	0.2492	51.556	4e-04
A15	0.6476	27.902	40.5423	47.5546	46.054	40.8423	44.6394	15503.8	32.5604	0.6139	6868.91	0.2592	10233.9	1432.71	2869.22	110358723883.054	6.4242	753.474	2.4367	3762.2	445.8	2126.09	2119.12	456.643	3310.36	316.304	2153.98	0.117	107041432389.714	0.0112	286747	5183.47	6.76573e+06	6575.11	1625.49	164.165	0.8154	9.5389	4.661	71.3174	0.1935	0.1309	0.9914	0.9367	-0.1696	0.9272	0.1266	70.0991	-0.0001
A16	0.795	12.1585	16.143	12.4609	21.5826	14.1987	21.5815	7650.84	16.6974	0.7744	930.326	0.5125	23731.8	487.964	1016.19	3412888144.2648	5.0384	290.598	2.5833	1324.59	169.76	696.26	646.609	168.041	1226.04	122.504	742.964	0.5854	-2.84934e+09	0.0351	45870.8	582.977	97571.9	2303.63	220.405	29.6479	0.7669	4.0435	3.4135	11.5634	0.3423	0.2426	0.9888	0.9301	-0.2028	0.9147	0.2487	21.6928	0.0019
A17	0.8363	81.1833	98.7134	104.005	107.247	121.937	121.799	492535	86.9912	0.8008	36897.7	0.0693	449543	427.85	864.776	214716131382.037	4.7322	231.018	4.1056	2067.08	143.248	654.799	607.891	16.5409	2013.7	104.14	632.778	0.8151	208333103582.398	0.0366	32642.9	670.655	161929	1984.8	203.01	16.5873	0.8434	3.1466	3.1499	6.3604	0.378	0.2782	0.9975	0.963	-0.1892	0.9063	0.2862	24.1764	0.0054
A18	0.7041	18.1225	20.7389	24.0519	28.4465	30.0245	30.6027	14850.9	19.6746	0.7119	69.3259	0.3848	8148.84	906.275	1405.21	10801358770.9571	4.9374	247.266	3.0228	1901.05	156.656	1194.94	1142.82	619.166	1293.41	107.433	1162.65	0.1906	7184287762.5667	0.0455	38189	487.488	102967	423.6	192.762	18.8594	0.8129	3.3271	3.1149	7.3051	0.3544	0.2711	0.9932	0.9394	-0.2057	0.9065	0.2671	22.1415	0.0048
A19	0.6556	70.3613	109.94	112.567	124.799	130.016	132.2	485281	92.894	0.7428	42887.3	0.0884	473059	580.956	1166.23	419249249558.829	5.2042	296.01	3.3924	1980.5	182.592	825.933	847.475	102.973	1844.98	118.925	858.892	0.4923	387143915927.245	0.0305	55150.6	1065	384550	3219.46	313.878	20.6861	0.8673	3.7537	3.269	8.2441	0.3456	0.261	0.9965	0.9561	-0.1997	0.9228	0.2774	31.4234	0.0042
A20	0.0977	14.0881	137.4	111.1	103.169	39.0491	123.735	19586.9	34.7365	0.5354	5154.61	0.3793	11348.9	528.849	1298.94	16031342918.6389	5.3122	418.218	2.3338	1660.69	228.977	860.244	774.829	227.172	1508.31	175.912	894.561	0.6741	18932700847.5715	0.0311	73870.8	744.215	545923	7065.09	422.314	21.5024	0.9091	3.3893	3.2471	10.153	0.3635	0.2991	0.994	0.9472	-0.2468	0.9577	0.2866	24.4208	0.0024
A21	0.8589	28.8316	30.6076	43.5052	37.3015	35.9727	36.0684	13143.3	29.6268	0.7715	4028.46	0.2254	26621.2	624.776	1110.19	10173953676.9669	4.7948	249.842	4.1859	1756.67	164.649	836.009	755.72	378.45	1395.93	109.107	859.933	1.2805	14950865937.6973	0.0442	45325.1	295.481	281519	4984.69	243.447	22.0753	0.8373	3.5802	3.2451	9.1443	0.3589	0.2662	0.9936	0.9471	-0.1708	0.8831	0.2696	17.8591	0.004
A22	0.889	30.7133	38.2307	42.3115	45.3194	32.9756	44.4549	31408.8	33.2359	0.8168	2809.95	0.1901	55271.2	428.853	572.604	7491041011.1731	2.8255	69.8866	3.2168	668.995	34.5141	474.814	439.471	295.105	262.189	26.6524	424.514	0.3552	4140982929.3095	0.1669	1821.64	-24.9251	-21632.8	-430.982	11.7122	-1.0889	0.7585	0.8896	1.6004	0.7976	0.6492	0.61	0.9932	0.9429	-0.236	0.8376	0.4964	6.3077	0.0453
A23	0.1518	25.3715	167.947	61.444	36.8207	157.32	159.428	26637.9	31.0807	0.5865	6427.49	0.2838	42467.1	192.978	1296.05	10062982467.4851	5.5728	256.225	4.3755	2577.17	266.21	757.593	722.566	0.9202	2691.45	149.959	813.131	0.7876	26854903992.8716	0.0332	149546	1137.56	2.29548e+06	10237.7	733.217	70.1249	0.8171	4.9525	3.8052	46.5841	0.3632	0.2898	0.9943	0.9596	-0.23	0.9518	0.2812	30.0499	0.0032
A24	0.816	9.0568	15.8616	17.4866	16.3471	17.7936	10.3199	13191.5	15.3306	0.7722	870.047	0.5209	2270.27	801.887	1117.08	-4.32324e+09	4.3408	177.174	2.5295	1328.86	98.4387	931.528	918.965	673.06	635.081	73.9768	944.752	0.3648	-8.98268e+08	0.0598	15457.1	160.287	35108.4	155.821	52.1647	9.4805	0.7353	2.4024	2.8417	3.4463	0.3989	0.3353	0.9874	0.9223	-0.1811	0.8679	0.3274	11.3088	0.0049
A25	0.8209	19.4369	21.1507	21.7119	30.179	22.9981	26.6477	-24113.1	17.4053	0.8141	2393.57	0.3314	-6990.09	669.045	1025.6	-3.43006e+09	4.4007	137.69	5.1478	1486.39	96.2022	823.786	792.631	476.092	973.085	61.6534	828.221	1.1425	5.57938e+08	0.0633	22053.4	272.274	149506	839.708	68.1682	10.226	0.7887	2.3634	2.7778	5.4597	0.4405	0.3829	0.9928	0.9458	-0.2123	0.883	0.3618	13.5191	0.0055
A26	0.4898	30.9054	61.2399	65.2147	60.6553	40.8204	70.7856	33654.7	31.8423	0.7216	7094.31	0.1902	68861.5	1130.07	1515.69	62692995610.6994	4.6433	203.506	4.0717	2213.75	113.895	1335.9	1322.58	582.804	1599.42	80.5773	1330.29	0.2138	64237437753.6722	0.0524	22009.3	1095.32	107650	435.182	123.631	11.7843	0.844	2.5132	2.9292	4.3996	0.4242	0.345	0.9975	0.9644	-0.2188	0.9144	0.3387	32.0006	0.0077
A27	0.8913	98.9323	111.953	118.582	125.009	121.504	138.161	829550	106.138	0.774	53634.2	0.0742	811523	314.068	784.53	265689295357.158	4.6917	221.757	8.4575	2408.01	145.813	492.637	481.224	36.5044	2409.22	95.8056	555.341	1.4687	236539476683.638	0.0333	37285.2	464.217	285756	3160.58	185.402	5.9782	0.9226	1.8649	2.6504	4.0481	0.4661	0.3917	0.9992	0.9784	-0.3003	0.9714	0.3902	21.2965	0.0049
A28	0.9011	65.8653	69.6697	87.3328	91.4818	82.3222	91.9962	274231	72.061	0.7879	24929.7	0.1245	225288	465.827	840.926	115950499366.837	4.6076	194.038	7.4316	2385.96	121.323	667.71	631.173	54.3905	2295.24	81.3854	675.997	1.0959	111117840530.924	0.0517	25556.3	594.704	47578.2	1506.22	115.888	11.3367	0.8704	2.2301	2.6974	5.6018	0.4711	0.3945	0.9988	0.9789	-0.2433	0.9363	0.375	24.1097	0.0075
A29	0.6565	0.0993	0.6412	0.604	5.182	0.6505	1.3708	-10472.2	3.8018	0.6594	-219.444	0.6717	18150.7	18.4817	40.8493	-1.9398e+10	0.6964	-13.1017	0.7426	-44.8295	-0.618	11.503	-13.1635	-19.127	-37.919	96.6717	768.321	1.3924	-8.52722e+08	0.0464	40696.8	413.959	192980	3730.28	191.073	26.7671	0.7479	3.7474	3.363	11.8043	0.3608	0.2572	0.9932	0.9457	-0.179	0.8843	0.2661	17.6863	0.0016
A30	0.6083	35.23	55.7805	63.666	56.4061	52.608	66.2549	69139.4	40.3169	0.7759	8480.51	0.1645	45453.3	491.965	1039.22	37024301187.2645	4.9064	239.425	3.4086	1668.58	149.671	746.649	722.542	146.828	1497.35	106.171	774.62	0.3423	32441969344.2087	0.0416	39017.7	671.678	67100.4	453.835	207.432	15.8245	0.8558	3.1707	3.1009	7.898	0.3763	0.2792	0.9956	0.9535	-0.1989	0.9224	0.2922	24.879	0.0016
A31	0.7096	29.0091	40.9851	37.8813	45.2546	43.757	49.6124	36649	31.2575	0.7556	4081.73	0.2162	38948.9	843.991	1220.45	18376682066.2499	4.5387	163.322	12.4089	2799.99	124.865	1028.94	975.447	332.214	2555.42	68.496	1011.58	1.4941	18425418632.0688	0.0566	28407.4	887.562	249096	2247.23	136.544	15.2695	0.8342	2.4085	2.8241	6.9587	0.4628	0.3806	0.9987	0.9777	-0.2382	0.9325	0.3735	28.4228	0.0053
A32	0.7129	19.1087	30.5636	28.1039	36.9161	34.7507	35.9604	-5765.91	21.7685	0.7513	1287.31	0.3331	10828.5	642.969	900.084	3455557944.0059	4.1087	148.912	2.9073	1277.49	87.5535	754.887	732.304	472.712	791.626	57.9701	778.734	0.5408	20264313931.0232	0.0626	12824.9	153.9	80766.7	227.913	53.1546	7.343	0.7397	2.0363	2.6168	2.2314	0.4588	0.4043	0.9929	0.9391	-0.164	0.8582	0.3879	12.4378	0.0123
A33	0.8273	46.3607	52.1758	65.5279	71.0468	62.9195	71.6964	108182	53.8301	0.7819	13106.5	0.146	86334.6	543.794	832.744	40530335651.646	4.3519	154.184	10.3052	1886.69	97.7345	684.182	645.979	201.239	1621.83	60.9817	666.747	2.05	39373880892.3318	0.0656	19175.9	375.923	93317.4	2400.55	112.443	9.6853	0.8331	2.1286	2.6681	5.1886	0.4779	0.4263	0.9979	0.9712	-0.223	0.9075	0.3918	18.534	0.0092
A34	0.4323	53.6577	117.957	149.89	139.6	176.631	206.183	45153	85.2035	0.4468	7513.66	0.4082	3792.18	645.355	1145.51	16744408982.6549	4.8674	229.766	3.648	1948.64	149.112	828.633	840.212	286.724	1595.45	100.524	866.994	0.7994	19871943462.9603	0.0398	37159.2	553.515	120070	1276.49	150.025	38.0882	0.5908	4.6366	3.6451	17.9271	0.3106	0.2228	0.9912	0.9363	-0.0924	0.7415	0.2203	23.9445	-0.0002
A35	0.5751	106.805	186.895	199.725	184.158	206.933	211.776	1.78569e+06	141.179	0.6659	104771	0.0631	1.82751e+06	407.855	799.949	689714830350.967	4.6535	192.523	3.8279	2380.95	130.249	640.738	581.502	-3.1135	2404.48	85.3808	585.804	0.6502	654186465309.188	0.0503	27485.3	660.132	78724.9	1492.26	152.759	10.0429	0.8607	2.4722	2.812	4.5576	0.4142	0.3496	0.9992	0.975	-0.2136	0.9251	0.3387	24.2384	0.0069
A36	0.6275	90.5393	145.001	142.433	168.593	172.286	167.426	917891	106.155	0.3718	116024	0.127	886031	453.493	809.586	3.49144e+11	4.3397	199.506	2.5339	1487.84	103.987	609.961	630.938	101.299	1436.27	77.8559	588.989	0.0971	357095642684.022	0.0499	15372.2	523.648	24488.7	300.186	64.1449	9.882	0.8102	2.2088	2.7683	2.8663	0.4266	0.3625	0.997	0.9623	-0.2004	0.8956	0.3511	22.9502	0.0083
A37	0.494	14.54	32.292	33.2261	28.1276	25.7088	40.082	-4554.86	20.7281	0.5178	408.474	0.5627	20088.5	542.279	827.074	-3.13621e+08	4.0284	135.498	4.585	1301.2	85.3043	685.906	667.812	403.599	883.706	55.0713	696.777	0.9394	36518414822.4996	0.0703	12760.1	133.232	22082	-229.977	63.0319	10.2748	0.706	2.3561	2.7623	5.0428	0.4597	0.371	0.9931	0.9469	-0.167	0.8351	0.3665	12.1734	0.0101
A38	0.4901	45.4212	89.7362	97.0354	105.88	70.8679	111.376	133246	56.3671	0.6375	21775.9	0.1482	144155	777.481	1163.97	143205473893.233	4.66	216.761	2.873	1739.71	124.535	919.026	949.227	351.659	1397.49	95.2234	962.654	0.4432	124673980083.488	0.0477	24428.9	668.928	69716.3	1140.02	128.235	9.7851	0.8472	2.3868	2.8025	5.132	0.4194	0.3231	0.9964	0.9585	-0.2173	0.9224	0.3389	25.7001	0.006
A39	0.8295	24.4352	30.887	34.9502	35.9588	31.4287	41.0467	26138	28.4598	0.8338	2860.34	0.2277	40907.2	628.311	917.919	10310346903.3438	4.4107	148.719	3.9001	1259.71	90.7287	806.224	809.83	375.132	1012.68	59.6025	783.325	-0.0624	17807674246.8564	0.0615	18052.6	366.137	-51429.7	-58.636	98.8481	9.2928	0.7996	2.2875	2.9067	4.7324	0.4329	0.3662	0.9935	0.9462	-0.1969	0.891	0.3645	17.363	0.0062
A40	0.6804	27.6877	38.4993	36.5043	43.7186	45.3748	47.8095	17393.7	31.5005	0.8242	6965.57	0.1998	66226.3	473.151	1087.92	10145070185.061	5.2131	298.167	4.0318	2004.08	201.438	733.876	710.935	45.8006	1999.29	133.844	779.918	0.9503	7984861664.0988	0.0338	62874.4	927.425	380480	6004.34	311.39	28.003	0.8414	3.7803	3.559	10.8398	0.3168	0.2404	0.9958	0.9577	-0.1933	0.918	0.2383	28.8331	0.0034
A41	0.6573	32.3776	47.7627	48.3109	51.7189	49.9636	57.3984	39853.8	39.3927	0.7589	8415.48	0.1784	23552.8	682.798	984.567	44087521438.2295	4.5077	171.956	3.1132	1532.05	110.024	843.637	863.116	216.522	1261.74	69.7078	874.686	0.0534	32164815581.3286	0.0509	19716.4	738.932	78378.4	193.381	95.7174	8.3753	0.8772	1.9624	2.5354	3.6419	0.4755	0.3877	0.9978	0.9661	-0.2566	0.946	0.3919	26.6764	0.0074
A42	0.7914	34.8616	40.0545	53.1374	49.5138	46.6969	53.241	30296.4	40.6913	0.8474	7481.95	0.1639	10772.8	950.193	1209.05	43592844026.7632	4.0395	138.122	4.612	1627.5	79.7734	1094.63	1098.08	489.25	1039.39	54.2689	1123.47	-0.335	44110449775.2896	0.0759	9303.54	673.251	6472.42	255.138	67.7401	6.7847	0.8347	1.6696	2.3842	3.4993	0.4963	0.4329	0.9978	0.9648	-0.2288	0.9057	0.4203	24.8792	0.0141
A43	0.5453	37.5957	69.3258	82.8117	72.5336	69.4977	76.5091	84587.5	55.7529	0.5735	18503.7	0.22	99599.6	913.171	1476.08	109810719488.358	5.1939	307.491	3.2588	2037.7	186.806	1181.68	1182.84	344.032	1737.83	126.148	1185.19	0.2162	146747683899.183	0.0305	44927.4	1391.06	192673	920.063	284.257	16.3476	0.8916	3.0597	3.1113	7.4024	0.3718	0.2982	0.9976	0.9596	-0.2453	0.9493	0.2955	35.4276	0.002
A44	0.4035	12.0515	28.1177	41.1882	29.5391	22.8579	39.9406	6731.33	16.1816	0.581	3078.54	0.5742	-9204.44	666.995	916.524	-1.59385e+10	3.6597	93.2565	5.2611	1187.63	63.2574	711.682	745.867	518.855	672.866	46.8056	705.144	1.1027	15788664448.5372	0.0925	11768.4	108.639	-44695.2	520.046	36.2448	3.8331	0.8051	1.4624	2.1529	0.6184	0.5344	0.4958	0.9951	0.9537	-0.2198	0.8803	0.4456	9.4236	0.0183
A45	0.6696	47.6109	70.3108	68.5472	73.6413	72.717	80.9084	87602.4	48.6228	0.5389	18128	0.1721	102173	767.354	1424.59	112407620593.605	5.3294	277.448	4.2092	2247.39	199.674	971.444	913.28	94.3474	2094.26	122.244	1044.55	0.8653	94328262246.9998	0.0322	71036.8	1400.67	646308	6117.85	361.432	10.777	0.9305	2.6433	2.8956	5.681	0.425	0.3622	0.9982	0.9711	-0.3021	0.9685	0.3479	36.8579	0.0076
A46	0.6235	14.1699	26.0314	30.1573	24.4427	27.8867	31.5353	-6347.9	20.6889	0.761	962.958	0.3556	-17016.6	607.457	844.707	24946903034.1312	4.0049	118.296	4.4446	1036.18	67.14	702.564	734.953	253.578	830.747	52.0611	711.637	-0.4398	14660050023.3314	0.0774	8113.39	339.058	-53157.1	-129.356	54.87	4.9747	0.8132	1.6858	2.3933	1.8631	0.5065	0.4138	0.9951	0.95	-0.2195	0.9011	0.3998	18.4077	0.0097
A47	0.8343	24.9546	32.6306	35.8049	33.4891	33.423	41.342	30355.1	27.2049	0.8119	5438.39	0.2401	6727.01	523.761	1047.79	9830129837.1866	5.0437	263.151	3.3275	1774.72	170.103	762.105	769.601	188.502	1558.4	104.769	851.496	0.4397	28724044670.4022	0.0355	42927.7	569.791	165920	1123.71	194.525	37.3655	0.6923	4.8838	3.6831	14.922	0.2699	0.1857	0.9902	0.9315	-0.1121	0.7894	0.2033	25.1948	0.004
A48	0.559	27.2935	48.6068	48.8957	49.6704	56.4464	54.2968	46242	31.6471	0.6165	5849.06	0.2536	20833.9	608.11	1355.79	12692613676.1828	5.5951	407.272	2.9587	2128.54	226.766	926.572	871.436	113.671	2037.51	166.67	979.809	0.3993	13911139177.5341	0.0237	80254.5	1182.85	504828	3649.57	418.343	60.6365	0.7402	5.8521	4.0042	23.5589	0.2751	0.1758	0.9912	0.9343	-0.1311	0.8598	0.1737	33.2448	3e-04
A49	0.8091	18.5486	22.5203	27.7673	21.9423	23.8115	27.0147	2307.87	20.312	0.656	3593.36	0.4224	33443.1	874.581	1098.86	-4.49872e+09	3.9854	127.313	2.727	1227.64	72.3185	970.312	989.941	724.204	538.141	53.3009	993.4	-0.0491	5537323464.0482	0.071	10062.4	123.596	161.754	-23.726	40.1517	4.7741	0.8543	1.5957	2.2111	1.9756	0.5067	0.4435	0.9919	0.937	-0.2597	0.9257	0.4414	11.798	0.0117
A50	0.5485	11.4697	15.4972	19.6623	17.7512	17.3054	19.6638	6032.4	16.0444	0.7415	2322.35	0.5275	-15489.8	1663.49	2076.7	20656251908.3513	4.5277	208.985	2.8989	2203.91	118.296	1851	1887.45	1408.18	760.511	86.0254	1881.26	-0.5341	-2.10855e+10	0.0481	20716.6	297.005	131140	-839.091	116.516	17.535	0.7551	3.3085	3.1883	5.8515	0.3431	0.2622	0.9851	0.9166	-0.1857	0.896	0.2711	19.1038	0.0062
A51	0.6358	35.2783	64.6479	54.0334	66.5053	61.982	71.2597	86687.7	43.6198	0.7979	9870.01	0.1596	76673.8	940.831	1899.62	159246585276.226	5.8322	429.793	2.8097	2894.15	276.41	1387.9	1393.87	174.935	2641.33	192.446	1379.35	0.1268	141911495051.309	0.0188	120226	2762.99	1.65647e+06	836.827	767.754	44.5527	0.8914	4.6267	3.7707	19.1671	0.3059	0.196	0.9961	0.9584	-0.2178	0.9524	0.228	51.5984	0.0022
A52	0.7204	44.4524	64.783	69.0734	66.8429	71.4294	74.6419	113889	54.5979	0.8383	14617.7	0.0931	137570	482.789	1035.76	62863897463.4676	4.926	279.608	3.9741	1980.49	172.526	701.714	661.429	105.375	1836.34	114.166	774.519	1.102	68656814438.4281	0.0384	44610.2	676.453	350711	4249.05	248.153	16.9057	0.8645	2.7818	3.02	8.0631	0.4243	0.3435	0.997	0.9663	-0.2361	0.9438	0.3404	25.1851	0.0028
A53	0.7402	19.5294	25.6629	33.8315	30.321	28.1082	29.5946	28698.6	22.4207	0.825	958.14	0.3075	10978.5	580.516	1146.68	-2.00324e+09	4.9621	260.744	3.3594	1633.6	167.352	813.073	741.12	307.391	1371.32	110.9	828.739	0.9374	12909873014.6466	0.0377	45147.8	451.311	289978	3863.65	228.261	39.4803	0.7208	4.422	3.6232	14.9333	0.3039	0.2112	0.9895	0.9313	-0.1246	0.8354	0.2191	20.0867	0.003
A54	0.7036	13.2773	21.9556	22.1838	19.8734	11.6444	28.0061	100.646	13.312	0.7026	1260.87	0.4859	4696.59	867.762	1440.27	-6.72857e+09	4.9969	325.732	2.3246	1826.51	178.161	1146.48	1145.8	728.558	1093.33	128.916	1132.53	0.1529	-1.63852e+10	0.0311	48850.6	387.865	115561	1369.82	214.65	21.9116	0.8401	3.4935	3.3085	8.0902	0.3402	0.2322	0.99	0.9301	-0.2269	0.9343	0.2614	17.8392	0.0032
A55	0.568	12.7622	20.1992	24.3284	19.0833	16.4172	19.9675	12175.6	11.832	0.8292	294.147	0.4484	-14538.8	785.55	1684.21	-6.45413e+09	5.6901	504.576	2.9629	2411.4	286.011	1144.09	1071.8	479.689	1949.48	209.847	1208.7	0.6602	17717077751.9515	0.0229	125206	749.847	921427	10375.6	572.489	99.1414	0.7033	7.1125	4.2417	47.4968	0.2506	0.1567	0.9847	0.9216	-0.2057	0.9507	0.1745	25.2708	-0.0003
A56	0.5348	87.9279	163.07	198.784	185.424	193.824	201.193	1.40307e+06	154.638	0.4168	144930	0.1057	1.43726e+06	778.794	1121.95	1281519010963.84	4.5358	182.555	3.7613	2022.85	110.299	946.788	900.638	85.8225	1977.44	79.7381	960.858	0.7252	1262658958861.32	0.0515	18740.1	1337.88	9018.15	1245.64	149.492	2.5016	0.9629	0.9604	1.9048	0.9201	0.6037	0.5762	0.9996	0.9881	-0.4218	0.9834	0.4763	35.5058	0.0123
A57	0.696	18.0718	24.0146	26.528	26.1065	35.0044	21.3363	-32577.7	21.3698	0.7874	3547.8	0.3425	14786.5	441.739	895.958	18130139310.3844	4.7681	202.786	3.874	1275.54	137.181	583.934	573.906	245.418	1079.67	91.2315	649.042	1.0209	-4.17326e+09	0.0478	36249.5	310.683	82998.9	1765.53	145.93	21.3028	0.7459	3.4632	3.338	9.1603	0.3553	0.2776	0.9892	0.9307	-0.1516	0.8558	0.2726	15.1084	0.0051
A58	0.7502	18.7927	30.3458	29.6378	25.0606	32.904	29.0759	21515.7	22.7323	0.7797	1028.88	0.3336	-16618.8	312.941	999.137	27129198693.1966	5.2589	295.481	6.9637	2360.1	216.692	614.386	516.29	4.2393	2337.51	124.981	648.521	1.6211	9995641157.5177	0.0333	90558.7	599.529	1.01946e+06	11094.6	347.587	65.761	0.6886	5.4007	3.9434	33.285	0.3043	0.1906	0.9927	0.9476	-0.1505	0.868	0.1944	24.556	0.002
A59	0.6239	15.9888	22.7174	31.5789	28.5874	29.3762	32.7888	-8603.97	21.0708	0.7642	2236.29	0.296	-13350.7	767.888	1134.39	9.21247e+08	4.2971	129.504	6.5572	1744.05	104.978	913.809	851.609	546.942	1165.14	60.9269	925.056	1.6568	-1.1343e+10	0.0687	17694.6	235.445	117567	1414.29	96.661	6.5367	0.8381	2.2689	2.654	3.8426	0.4677	0.3979	0.9966	0.9599	-0.2179	0.9138	0.3863	13.4187	0.0139
A60	0.177	15.4528	86.7181	29.5105	24.4809	48.8085	64.3883	-5507.39	21.5139	0.6492	3202.27	0.3787	-10828.9	753.972	1357.28	-1.29462e+09	5.1724	305.914	3.0246	2046.23	174.495	1010.02	998.011	590.515	1514.8	125.147	1078.18	0.6019	17456121834.2978	0.0367	47681	277.844	129009	1733.5	214.018	39.1372	0.7095	4.4737	3.6848	18.3063	0.3138	0.2264	0.9901	0.9323	-0.1515	0.8754	0.2191	17.8234	0.0019
A61	0.8194	33.7714	39.7623	43.1152	48.2356	47.5845	51.5924	38549.8	35.2308	0.7964	6639.87	0.1773	11106.4	682.559	1111.99	26603341201.4097	4.5376	175.593	3.5675	1972.45	111.576	891.636	903.981	281.996	1641.85	70.8822	901.556	0.3505	30831689632.5376	0.0472	20829.5	766.441	-19443.4	552.294	101.401	14.5449	0.7582	2.8629	3.0658	6.5778	0.3796	0.3034	0.9964	0.9593	-0.1541	0.8612	0.3058	24.2822	1e-04
A62	0.6678	19.8073	29.3025	37.7306	34.1187	33.7973	47.8799	16378.1	22.6919	0.7299	1101.53	0.3121	5971.02	825.715	1141.8	21353693179.1385	4.1537	142.634	3.5305	1400.91	80.159	945.818	968.006	482.434	837.959	62.1288	1013.22	-0.1176	4137729145.9016	0.0698	12578.6	422.479	-21968.1	-273.129	78.0675	5.9806	0.8274	1.7545	2.4506	3.9033	0.5011	0.4343	0.996	0.9561	-0.2359	0.9203	0.4143	21.4546	0.0104
A63	0.7228	15.5471	21.4898	29.2919	25.9999	27.124	33.9986	-18813.7	20.7313	0.7726	3052.15	0.3452	15456.4	224.685	1032.93	-1.6366e+10	5.2732	270.913	6.4045	2320.14	250.705	509.2	383.77	-10.1601	2327.58	140.26	634.925	1.8214	-2.53522e+10	0.0354	124447	481.036	1.6979e+06	20766.8	466.414	90.5563	0.6753	5.8113	3.9575	55.8003	0.3225	0.2551	0.9904	0.9459	-0.1678	0.8967	0.2362	18.9687	0.005
A64	0.7887	50.2454	61.2553	74.4452	70.379	62.5081	73.7343	154589	53.3368	0.8168	15484	0.1293	114014	690.378	881.885	79943325963.0086	3.6794	113.145	3.118	1369.98	62.3319	780.563	783.114	375.068	944.873	48.4122	763.392	-0.0075	68219035092.7162	0.0925	10692.6	298.741	7047	-83.0308	44.3752	2.7568	0.8928	1.0831	1.8101	0.7283	0.6254	0.5739	0.9985	0.9726	-0.326	0.9466	0.4784	16.8445	0.0174
A65	0.6477	103.761	161.546	174.274	175.276	148.537	177.925	1.57013e+06	130.133	0.8369	78345.5	0.0472	1.54328e+06	376.273	627.148	393829254912.723	4.0649	130.034	4.3969	1439.91	78.5908	509.044	484.139	92.4375	1375.63	52.6358	506.964	0.3342	394396843919.212	0.0738	12324	372.397	-55697.9	77.6133	54.55	1.5574	0.9165	1.3425	2.041	1.0159	0.5764	0.5327	0.9995	0.9769	-0.3293	0.9586	0.4548	17.1782	0.0121
A66	0.5554	43.8108	83.6809	85.0215	95.8616	80.2881	103.554	158697	59.4335	0.5769	24082.3	0.1825	97727.8	609.131	862.632	70587564191.6314	4.1235	143.821	3.946	1482.61	90.9052	763.077	729.623	308.68	1150.98	63.4678	794.722	0.7053	85818248506.2932	0.0628	12161	320.076	137584	1116.93	60.1125	5.7585	0.8772	1.5302	2.2808	2.2296	0.5294	0.4552	0.9978	0.9674	-0.2609	0.9362	0.4257	18.8777	0.0076
A67	0.6485	15.7941	25.5675	26.5244	26.1716	30.1859	35.5027	-16986.1	21.475	0.8017	710.828	0.3653	36381.9	413.642	1377.56	-9.56482e+09	5.7816	573.808	2.4949	2056.05	298.186	876.128	808.479	127.831	1947.67	227.242	930.187	0.5402	25368456008.9184	0.0209	133263	952.264	1.06695e+06	9358.83	656.548	65.2168	0.8147	6.2161	4.0572	31.1539	0.2548	0.1792	0.9892	0.9288	-0.1904	0.928	0.1699	29.6826	0
A68	0.6263	21.7433	30.9763	35.9989	37.3183	33.1122	43.1005	16151.2	29.3464	0.7131	3448.76	0.2933	8824.41	428.343	552.546	-6.94202e+08	3.4585	86.2273	3.7938	902.984	56.3675	503.853	490.339	265.327	570.569	38.721	539.944	0.4065	-7.34218e+09	0.1154	8929	82.7801	9786.8	428.968	9.157	2.2471	0.847	0.9153	1.8236	1.3567	0.6388	0.5754	0.9967	0.9604	-0.2902	0.9178	0.4752	9.5118	0.0271
A69	0.6137	41.2606	65.666	81.841	78.1831	58.4514	88.0982	82185.4	44.3803	0.7231	11494.3	0.1702	63533.2	987.76	1821.72	150769368367.794	5.8355	446.154	2.6136	2775.68	262.769	1369.05	1376.27	228.638	2574.61	186.794	1432.72	0.0621	169376650493.533	0.0168	105149	2356.76	1.20836e+06	919.7	638.466	55.0303	0.8356	5.6054	3.8954	22.5588	0.2589	0.1699	0.9952	0.9501	-0.1812	0.9252	0.1842	45.9185	-0.0004
A70	0.7089	65.7765	83.5426	96.8271	99.5289	95.9019	98.8351	275059	78.9579	0.8287	27453.1	0.083	326563	741.628	1138.44	309049429347.955	4.7645	193.324	5.4162	2494.75	133.78	945.222	959.948	130.353	2275.75	81.4284	948.539	0.7005	312970547253.276	0.0533	26563.8	1046.94	60222	798.481	131.63	18.2847	0.7908	3.1471	3.1347	8.0257	0.3834	0.2756	0.998	0.9696	-0.1621	0.872	0.2927	33.4963	0.0059
A71	0.7446	43.3437	59.3798	65.4115	65.3726	54.8463	70.2975	77777	45.0523	0.7806	11909	0.1298	101776	1017.45	1440.78	124646378068.108	4.7083	202.124	3.943	2241.31	134.441	1227.72	1211.21	650.583	1594.85	90.4787	1266.06	0.5783	110732633692.801	0.0463	29781.8	621.094	145875	976.079	192.344	12.4579	0.842	2.5221	2.9345	5.6135	0.4143	0.3473	0.9966	0.962	-0.2092	0.9192	0.3356	23.1232	0.0043
A72	0.8831	19.5111	24.2125	28.8914	27.6701	27.2408	31.8657	14083.2	21.2103	0.8335	3243.43	0.3187	-4702.27	1187.66	1557.97	14160588245.3164	4.4959	178.003	5.4957	2373.84	121.102	1393.11	1332.53	933.023	1445.4	74.7899	1361.3	0.9849	14263668882.1677	0.0565	21194.6	326.986	16138.1	433.398	94.8506	38.9232	0.3306	4.715	3.6147	17.1861	0.2847	0.1928	0.989	0.9286	-0.0482	0.574	0.2138	18.0898	0.0027
A73	0.5995	7.4199	13.4778	14.2514	22.6711	17.2053	18.0731	-3542.93	13.6047	0.7585	-424.244	0.588	13601.9	629.35	991.599	-2.60871e+09	4.3433	153.749	3.9955	1299.21	100.8	763.421	743.004	492.341	734.39	61.8412	755.312	0.8066	-9.33042e+09	0.0618	15671.1	149.987	14544.1	428.496	74.1675	14.2047	0.6688	2.6363	3.0076	7.0817	0.4121	0.3392	0.9882	0.931	-0.1822	0.879	0.3213	11.6378	0.0038
A74	0.7827	32.2731	40.6086	45.1581	47.2836	54.1165	51.0491	60102.6	37.719	0.7419	9040.7	0.1933	27215.5	614.936	928.455	20995312148.115	4.2575	150.304	3.2927	1284.63	99.103	786.877	764.726	446.99	777.818	57.5923	777.522	0.507	3547095668.9647	0.0627	16035	185.189	13775.9	706.86	85.5704	2.4499	0.9182	1.4168	2.0644	1.9775	0.5621	0.5187	0.9968	0.9644	-0.3533	0.963	0.4639	12.1078	0.0108
A75	0.7296	35.079	49.3304	48.6111	53.1121	58.8186	57.0891	39150.1	39.8265	0.738	7890.32	0.1906	32594.6	536.697	983.654	22317885535.984	4.4753	155.9	6.4679	1782.36	149.574	751.26	643.92	345.63	1400.6	71.6716	702.109	1.9301	13739530083.481	0.0748	38525.7	221.001	370956	5384.84	227.439	17.2901	0.8316	2.4993	2.9053	9.8288	0.4828	0.4228	0.9956	0.9608	-0.2077	0.8965	0.3704	12.8768	0.0115
A76	0.8736	22.75	28.6842	28.8273	32.8246	33.174	24.5758	11397.1	23.5089	0.814	3788.22	0.2764	-10474.3	641.583	1159.76	3836502898.1602	4.544	226.18	3.7975	1578.98	155.435	802.606	794.678	51.8249	1602.39	102.33	857.187	1.0585	2790773445.1591	0.0557	40559.5	1037.46	110384	2109.15	173.451	25.873	0.7033	3.6743	3.3805	12.6211	0.3933	0.3029	0.9934	0.9488	-0.1575	0.8323	0.2944	31.4626	0.0072
A77	0.7226	52.1916	69.549	81.1368	81.9673	65.8344	86.4318	133604	59.8035	0.74	17859	0.121	165853	416.306	961.943	99740082892.5316	5.0388	285.827	3.7247	1772.16	168.156	652.409	611.704	-12.8515	1738	120.65	688.535	0.8757	62731700729.7848	0.0375	47622.6	730.499	281827	3828.59	240.984	16.0313	0.899	2.5966	2.9709	5.4679	0.3965	0.3307	0.9972	0.9645	-0.2376	0.9505	0.3255	26.2347	0.0055
A78	0.4626	13.0287	26.3878	29.2113	27.5732	18.474	29.5666	18582.4	16.3628	0.7435	2339.71	0.4523	-14166.4	758.073	1133.66	9967712542.0434	4.5317	222.497	2.2318	1271.12	121.14	917.435	905.566	603.47	756.759	86.7361	927.665	0.1908	9.36752e+08	0.0478	19437.2	231.049	67283.9	-8.2522	141.06	9.3881	0.865	2.2692	2.7494	3.5935	0.4216	0.348	0.9889	0.9257	-0.2296	0.9239	0.325	15.761	0.0066
A79	0.8622	14.0908	22.1131	20.1641	19.0773	16.7747	23.6551	19460	16.9968	0.8405	1985.12	0.4	15264.1	563.253	985.993	18803040260.4699	4.4162	219.872	3.2214	1281.05	136.689	771.327	691.07	447.322	841.997	95.6926	770.726	0.9116	-1.85176e+10	0.0597	25842.7	131.003	105739	1475.22	114.677	20.7094	0.6733	3.3545	3.2363	9.0069	0.3872	0.303	0.9828	0.9183	-0.1726	0.8377	0.2878	9.9763	0.0117
A80	0.8195	50.3313	59.6014	64.2468	63.5719	64.9205	65.4967	114637	50.717	0.808	10741.1	0.1235	124283	69.3962	132.476	-9.81472e+09	1.759	29.0041	4.6924	166.193	9.4493	87.2922	106.178	-9.0834	152.569	6.0829	141.029	0.2656	4.56635e+08	0.3789	-1069.34	-19.3543	52792.7	19.2534	8.5062	2.4611	0.6666	0.3761	0.9047	-0.7709	0.8478	0.8652	0.9941	0.9624	-0.2956	0.7555	0.292	4.8631	0.2367
A81	0.6707	25.4111	41.2689	48.815	50.9136	39.14	51.4681	38404.3	33.6767	0.8131	4373.32	0.2017	5390.5	622.862	1037.54	18241499845.7553	4.6038	146.018	10.649	2268.71	143.293	765.711	695.954	267.339	2081.09	69.3834	768.178	2.4361	7.59604e+09	0.0639	52889.3	531.78	791116	9559.18	237.568	28.6668	0.7787	3.1989	3.3146	17.1061	0.4132	0.3378	0.9962	0.9639	-0.176	0.8662	0.3286	21.1729	0.0087
A82	0.5294	63.3472	119.018	111.308	150.732	140.421	148.673	406378	89.8521	0.4629	62848.8	0.146	408889	484.041	838.936	192995137242.303	4.4148	220.883	2.8439	1352.28	112.594	656.051	650.979	128.561	1244.26	86.5178	665.399	0.4579	203186153735.859	0.0557	22217.5	490.88	-16040.9	513.379	124.961	2.8537	0.9612	0.9923	1.8905	0.832	0.6335	0.586	0.9995	0.9823	-0.4352	0.9867	0.4775	21.8406	0.0127
A83	0.758	8.4303	13.8798	7.0509	14.0492	17.7968	12.0602	-24418	10.6905	0.7916	287.49	0.7075	4510.99	1397.56	1811.27	10548063133.2815	4.7644	252.855	2.8249	1982.31	146.086	1594.53	1603.64	1013.32	978.702	97.6557	1612.31	-0.1358	1264121800.9853	0.04	32332.6	776.93	24798.2	-920.529	145.128	27.7075	0.6925	4.04	3.3418	9.5056	0.3319	0.2189	0.9857	0.9176	-0.2363	0.9337	0.2297	27.1987	0.0011
A84	0.7431	27.59	34.9466	39.0604	45.2369	44.0944	48.3416	23935.3	31.8213	0.5729	6999.67	0.2792	9452.35	515.5	1092.93	15365647989.5005	4.6376	151.52	8.2379	2250.41	181.83	685.189	609.136	132.168	2191.2	84.9788	782.649	2.2603	36186264359.421	0.0558	80501.7	618.06	1.60554e+06	21029.9	418.622	25.304	0.8829	2.838	3.0952	15.5866	0.449	0.3643	0.9969	0.9684	-0.2213	0.9284	0.361	24.0456	0.013
A85	0.2845	17.9119	55.6866	88.1266	49.821	139.543	194.521	19669.7	25.2897	0.4624	7663.03	0.4303	27703.6	456.973	1235.81	24467970066.3559	5.5858	387.448	7.3943	3299.15	249.234	846.863	826.55	33.7871	3253.36	160.687	884.516	1.2749	9884438126.4471	0.028	106653	1148.01	1.39855e+06	9983.35	538.557	51.4559	0.8033	4.724	3.7313	30.2853	0.3123	0.234	0.9967	0.9674	-0.2094	0.9363	0.2244	31.2932	0.0013
A86	0.294	18.8628	57.8377	90.2632	51.7834	138.851	197.674	19195.1	28.2338	0.4528	5853.39	0.4483	16443.6	456.341	1209.49	24021888602.8887	5.6524	398.601	7.4339	3226.49	244.351	806.92	837.311	58.4686	3251.7	161.266	870.967	1.3086	29243685214.4359	0.0272	109185	1161.9	1.40339e+06	10562.2	509.337	55.1507	0.8088	4.8174	3.6559	29.4524	0.3193	0.208	0.9967	0.9659	-0.2003	0.9374	0.2344	32.0185	0.0025
A87	0.8211	18.39	24.6607	28.2395	30.8743	27.2242	30.7532	3964.22	17.0017	0.7311	1768.51	0.3963	6579.85	610.756	916.957	25862800102.1911	4.39	150.107	5.261	1470.22	101.806	738.947	752.04	426.164	1030.57	67.771	741.739	1.1489	4608101930.8782	0.0602	18840.8	246.886	13193	1062.17	94.6117	11.5225	0.8034	2.1481	2.8685	3.6127	0.4255	0.3422	0.9943	0.9503	-0.2061	0.8983	0.3562	13.8524	0.0056
A88	0.4515	9.474	22.6067	30.5025	21.8562	17.428	28.7688	406.172	17.982	0.57	1785.63	0.6949	6429.73	479.156	782.662	-1.08249e+10	4.5041	199.447	2.2146	947.768	118.51	620.524	652.047	323.665	670.604	89.9835	698.024	0.2228	3714534490.7535	0.0469	16743.3	119.674	76438.2	435.404	87.1845	16.9639	0.6973	3.0742	3.0465	5.1529	0.3611	0.2585	0.9803	0.9041	-0.1533	0.839	0.2712	11.7318	0.0034
A89	0.4588	9.5952	20.7835	30.6906	18.739	26.3863	30.9192	-2659.38	17.9292	0.5745	-1307.29	0.678	-9680.76	466.247	849.004	-6.41528e+08	4.4955	207.364	2.3103	1042.58	118.241	650.266	621.862	339.743	636.213	89.405	679.182	0.2636	-1.07083e+10	0.0492	21270.4	117.355	-44834.8	251.662	74.3708	16.526	0.6968	3.2052	3.1245	6.0721	0.3653	0.2806	0.9802	0.9031	-0.1585	0.8469	0.2757	12.6415	0.0067
A90	0.54	23.0977	42.7019	47.1331	29.5449	46.8275	50.7409	27422.7	24.767	0.6513	7769.04	0.3019	-8776.95	572.338	1117.89	24798832665.0463	5.1092	285.887	5.7294	2293.49	175.778	829.034	771.065	270.005	2012.42	124.675	856.286	1.0883	19150789416.8567	0.0324	51079	514.911	501510	5331.66	279.733	35.9062	0.7708	4.4173	3.5978	16.801	0.3147	0.1921	0.9944	0.9495	-0.1489	0.8672	0.2169	22.875	0.0026
A91	0.5401	61.4	114.27	93.5754	106.312	110.847	125.534	301630	67.9332	0.536	37913.9	0.1425	295575	793.45	1413.68	350150816049.195	5.3018	329.453	2.6894	2077.65	191.429	1115.57	1064.24	240.513	1810.28	133.493	1110.27	0.389	371902854497.499	0.0276	59046.1	1258.56	342156	1924.51	342.375	10.2275	0.9469	2.3099	2.8261	3.7104	0.4431	0.3526	0.9982	0.9694	-0.3103	0.9821	0.3536	34.2499	0.0037
A92	0.5837	31.334	49.5416	53.7096	63.3217	52.0453	59.3944	19743.5	37.131	0.6932	8379.98	0.1975	39320.5	49.1464	93.0408	-7.05621e+09	1.7202	26.1795	2.7038	134.501	13.9309	88.7684	78.1762	52.7002	186.891	16.3056	108.928	0.4695	23852779266.0031	0.3535	-1141.49	44.2176	-10993.4	-177.64	21.5496	0.5494	0.8631	0.1991	0.6461	0.5508	0.9014	0.8977	0.9951	0.973	-0.5304	0.9079	0.1791	3.6697	0.26
A93	0.7731	18.6494	28.3265	28.7206	24.3718	30.1361	36.7383	17506.6	21.5552	0.7118	1954.18	0.3237	-17147.4	546.194	784.415	-4.9508e+09	3.8144	115.339	3.0884	950.988	77.2171	651.969	670.678	333.299	664.808	50.3006	679.421	-0.0099	-3.4981e+09	0.0794	7699.02	134.319	1555.84	242.103	36.5109	7.9395	0.5498	2.8773	2.8658	3.671	0.3954	0.3257	0.9847	0.9128	-0.1031	0.6526	0.3122	15.0641	0.0083
A94	0.6682	17.2158	24.8296	26.1357	27.3032	23.2697	31.3137	651.88	22.5366	0.739	2627.31	0.3805	10715.5	310.363	393.282	3406857894.1402	2.6808	46.4248	4.2068	534.029	29.9952	358.383	359.291	217.073	375.838	20.9643	357.714	0.5042	-1.22336e+10	0.1997	3500.03	101.778	23117.1	81.8645	28.4387	1.8005	0.7297	0.8066	1.5465	1.6852	0.68	0.6595	0.993	0.9458	-0.2338	0.8087	0.4714	6.1706	0.0639
A95	0.8947	10.688	8.2732	17.4936	14.13	8.3957	15.9681	1860.13	12.2006	0.7919	1385.67	0.61	42308.9	608.044	1050.76	5718907324.5638	4.64	263.878	2.3427	1269.35	140.823	837.528	828.65	425.052	856.14	104.73	859.449	0.1289	3376708975.9715	0.0418	26011.8	333.741	22364.5	34.5918	130.179	12.6485	0.8673	2.5907	2.8012	3.9833	0.411	0.3041	0.9918	0.9342	-0.3021	0.9569	0.3102	16.7288	0.0068
A96	0.3486	14.0754	47.2198	42.4078	37.3022	46.7	51.8785	27404.7	28.8229	0.5821	6622.46	0.3391	4091.55	352.231	626.249	4087181973.8934	3.8751	126.373	3.4038	844.018	72.8551	483.172	501.854	112.369	779.51	51.6005	449.071	0.3513	-1.46926e+10	0.0775	7467.09	195.374	29778.2	-211.448	50.961	12.8687	0.6156	2.464	2.8882	3.1639	0.4104	0.3365	0.9904	0.9315	-0.1043	0.7226	0.3213	13.9508	0.0102
A97	0.4727	18.7018	37.8744	30.8973	46.1369	28.0117	51.6598	1764.28	22.7582	0.6142	4235.83	0.3504	25265.6	284.65	1095.94	1766806113.8772	5.5564	402.017	3.0848	2044.16	245.44	662.953	703.269	28.7272	2002.77	167.82	801.869	0.4544	11458228778.5983	0.0282	98399.3	948.66	949293	4694.31	552.326	65.1274	0.796	5.3455	3.9213	34.4459	0.329	0.2225	0.9904	0.9403	-0.1917	0.9282	0.2221	27.1299	0.0014
A98	0.6092	16.278	25.8899	26.1746	26.9548	26.5264	26.928	1541.6	18.4644	0.7452	-1627.63	0.3953	20165.7	975.156	1280.13	-3.98979e+09	4.3188	154.266	3.9839	1658.35	98.7262	1143.04	1109.67	572.963	1027.01	64.058	1122.37	0.2229	17455601500.4484	0.0647	15797.2	588.919	34838.3	-3.1252	70.1939	11.3531	0.7511	2.4507	2.8374	4.1169	0.4029	0.3294	0.9942	0.9464	-0.1738	0.8623	0.3335	22.0439	0.0068
A99	0.4656	32.3965	66.1884	75.1306	56.2532	82.5314	86.8027	31155.9	45.0985	0.536	11294.9	0.2431	30907.6	354.547	507.107	-8.12268e+09	3.2602	89.4848	3.5556	805.488	50.8862	453.518	431.382	252.392	545.742	26.6675	487.553	0.1552	8065642606.3665	0.1215	-2918.2	69.3232	36240.1	-244.471	35.7559	-0.1538	0.8816	0.5995	1.5307	0.0892	0.6956	0.6755	0.9973	0.9685	-0.3506	0.9415	0.4575	9.3958	0.041
A100	0.8811	26.1141	30.606	38.3078	46.4111	36.9106	53.2079	13140.1	30.1558	0.7043	1860.69	0.2684	-23813.8	574.041	1065.03	15274989595.8173	4.7231	184.705	4.9165	1572.67	150.292	783.576	681.384	305.598	1304.48	85.2075	792.102	1.3197	1.05111e+09	0.0555	42106.2	354.465	238059	4278.87	205.18	8.3127	0.9204	1.9937	2.6247	4.8776	0.4716	0.415	0.9973	0.9667	-0.3186	0.967	0.3971	19.5218	0.0059
A101	0.5082	41.651	85.594	94.5712	101.243	101.686	142.389	144800	65.5772	0.6024	20150.2	0.1639	156176	136.989	306.374	21536333738.097	3.5355	113.043	2.592	556.818	61.3988	273.519	275.236	24.8463	579.949	44.4261	231.679	0.3483	27221943972.3585	0.1013	5799.17	126.288	6852.18	128.675	45.2766	0.9728	0.9342	0.757	1.4415	0.5991	0.7256	0.6951	0.9972	0.9713	-0.4459	0.9664	0.4107	9.7745	0.041
A102	0.4642	46.7795	102.415	222.233	78.4603	225.796	226.346	94455.9	63.3756	0.5671	16586.9	0.1999	82624.6	347.329	822.925	38099697308.7971	4.9827	216.305	10.4017	2256.19	170.195	585.426	517.974	-18.2781	2225.06	93.3775	608.58	2.1467	58761823624.7671	0.0388	57309	683.07	1.11218e+06	12093.9	300.587	19.5939	0.8828	2.8566	3.1058	9.0593	0.3959	0.3418	0.9982	0.9718	-0.2386	0.9373	0.3278	23.5161	0.0051
A103	0.35	48.2804	135.664	92.1891	88.7614	199.222	216.918	155622	58.498	0.5511	22385.2	0.1729	138502	556.062	882.047	3.45907e+10	4.4483	154.574	6.0118	1550.85	100.831	711.214	670.039	59.0011	1530.85	69.8412	744.442	0.9849	70001766558.6011	0.0596	22555.3	716.278	49364.5	1003.93	115.388	5.1114	0.9131	1.5606	2.2855	1.5895	0.5403	0.4729	0.9992	0.9769	-0.3205	0.9602	0.4335	25.8927	0.0128
A104	0.6611	15.4766	22.118	31.5964	27.9477	27.6272	31.3349	18243.7	18.2246	0.6848	1402.08	0.4105	2770.82	290.546	542.437	5929059476.5614	3.8415	175.52	2.9224	770.968	89.891	402.972	357.75	162.403	605.501	67.4329	434.458	0.9212	-4.88807e+09	0.0849	6237.9	17.9939	95143.1	574.709	62.9498	7.2692	0.7571	1.8816	2.5102	4.0079	0.5077	0.4463	0.9877	0.9315	-0.1902	0.855	0.3895	8.1989	0.0206
A105	0.78	14.1314	24.6927	38.0832	39.8476	21.6046	42.2557	-5996.57	17.5255	0.5914	2116.22	0.6103	-17251.9	468.662	890.346	-1.26651e+10	4.5152	226.966	2.5046	998.294	130.823	669.35	626.27	297.222	791.446	92.5263	669.931	0.2987	28864917955.8345	0.0459	23690.1	278.033	19466.3	486.189	106.841	9.939	0.8606	2.3854	2.6083	2.8165	0.4297	0.3618	0.9925	0.9394	-0.2647	0.9454	0.3492	14.3001	0.0041
A106	0.7581	61.2916	82.6437	186.828	199.541	87.503	191.126	248757	68.2368	0.7603	25350.8	0.1134	240178	775.57	1532.86	370892894463.486	5.4302	403.236	2.7491	2280.16	227.262	1199.98	1262.28	216.709	2031.73	165.28	1247.33	-0.3818	388301398959.047	0.026	81023.8	1759.73	595975	-4202.89	485.367	20.7898	0.9242	3.2048	3.2325	8.1635	0.3661	0.3057	0.9971	0.9634	-0.2641	0.9721	0.2837	39.8515	0.0071
A107	0.7949	53.9005	67.8252	78.3173	73.6083	77.403	76.922	159466	60.5377	0.7639	20603.6	0.1148	172013	551.526	706.091	70758701990.9671	3.7575	122.9	3.5987	940.42	67.3761	612.689	636.826	117.689	882.146	48.3751	632.928	-0.2311	61401927122.4966	0.0887	7883.8	483.175	-33897.9	417.453	49.2448	3.4655	0.8983	1.0331	1.9094	-1.3557	0.6084	0.5513	0.9985	0.9726	-0.3366	0.9612	0.4619	20.8114	0.0196
A108	0.6895	56.2437	85.0541	105.244	103.644	102.55	140.016	183243	72.8357	0.5637	27578.3	0.1439	189125	456.772	1078.96	112454039061.445	5.1896	254.25	5.8456	2273.11	191.206	713.133	711.923	52.3235	2269.23	112.07	774.024	1.5266	93425222732.2922	0.0388	68905.5	720.165	650569	9796.32	350.873	35.702	0.8004	3.7635	3.4489	21.6941	0.3763	0.3217	0.9957	0.9602	-0.205	0.9242	0.3176	25.149	0.0079
A109	0.4217	26.5359	64.9052	62.4256	90.2128	65.5718	93.2739	45147.8	48.6259	0.3845	12224.6	0.3753	24105.7	434.48	839	17392634162.6501	4.6284	226.399	3.0969	1414.5	132.059	655.622	596.924	227.834	1211.32	91.8448	682.882	0.7354	19411435818.2398	0.0502	19286.5	361.506	98726.1	1091.58	143.065	12.547	0.835	2.6818	3.0442	7.2223	0.3959	0.2933	0.9944	0.9493	-0.1942	0.9046	0.3185	18.1497	8e-04
A110	0.6686	49.1787	69.916	73.8589	78.0229	87.427	93.1355	166531	63.8487	0.6587	17724.3	0.1422	171654	428.784	766.362	28932214074.5884	4.5139	158.962	4.9012	1573.9	108.234	604.202	536.818	179.446	1405.2	75.5415	608.394	0.9864	34186167673.1806	0.0572	18469.9	306.403	95293.4	947.163	104.663	9.3946	0.8152	2.2835	2.7417	5.0527	0.4569	0.3799	0.9966	0.9622	-0.2109	0.9064	0.3613	17.7481	0.0069
A111	0.4372	19.0332	40.4263	34.2822	44.8992	45.1084	49.2375	1530.65	25.1736	0.6007	2829.92	0.4259	-10265.9	665.005	1193.53	2187903968.2851	5.0564	225.878	4.5964	1773.58	155.898	914.287	829.978	88.6098	1776.64	93.6367	924.392	0.3259	13083167264.0816	0.0339	43546	987.615	203182	-237.909	193.964	32.5825	0.7083	4.2481	3.5967	15.9841	0.3373	0.2404	0.9929	0.9464	-0.1418	0.8663	0.2464	31.4866	0.0024
A112	0.6886	33.3754	46.4836	50.1882	43.0154	47.3955	56.7565	29186	35.2639	0.7331	8686.93	0.1933	66228.4	968.327	1329.37	48045720690.8207	4.5284	167.104	6.9212	2093.02	120.419	1162.26	1160.78	489.412	1634.43	71.7413	1120.3	1.4499	55828450990.049	0.0542	30401.8	657.17	191380	2001.32	141.015	16.5807	0.779	2.5343	3.0055	8.7969	0.448	0.3797	0.9963	0.964	-0.2015	0.904	0.3637	25.3721	0.0067
A113	0.3202	38.4587	118.113	140.037	130.073	101.343	148.236	85508.9	63.405	0.2698	24824.2	0.4302	64807.8	549.17	1076.62	36591547353.5677	5.1158	283.698	2.6032	1688.97	164.683	833.901	810.583	188.396	1373.94	114.72	851.867	0.2625	30512419505.3984	0.0365	42924.5	754.268	109193	885.202	240.151	14.4453	0.8757	2.8456	3.0488	7.8659	0.4111	0.3229	0.9953	0.9546	-0.2209	0.9355	0.3129	25.8996	0.0065
A114	0.3995	48.1219	131.42	153.055	142.053	106.613	159.346	210144	67.2537	0.2645	71269.9	0.3044	236922	708.559	1137.05	175346056383.425	4.9369	238.706	6.5233	3623.5	158.649	921.087	878.809	123.684	3625.5	108.994	924.582	0.9554	200970425909.315	0.0367	45263.8	1057.04	250956	2300.33	181.514	21.9801	0.8145	3.2059	3.1762	10.7346	0.408	0.3283	0.9992	0.9789	-0.1935	0.9126	0.3007	32.4676	0.0072
A115	0.8036	48.9787	70.8115	100.421	87.5337	83.8494	98.113	112100	57.018	0.4204	26317.9	0.2593	98012.6	508.719	725.119	35897911581.4249	3.6626	101.949	3.8492	784.165	61.1766	634.62	610.988	193.899	733.568	40.2829	590.546	-0.2569	44820001957.1859	0.0953	6267.88	461.597	-17247.7	-225.377	48.0632	1.823	0.7991	1.328	2.1831	2.1552	0.5784	0.5108	0.9959	0.962	-0.2472	0.897	0.4634	17.6665	0.0181
A116	0.1893	32.2209	175.616	60.8794	32.631	144.517	151.978	-20363.6	61.849	0.4764	1424.96	1.0274	-2022.97	931.035	1665.33	18584813451.8771	5.5306	420.84	3.0291	2258.96	243.969	1208.43	1245.15	608.376	1641.3	170.254	1246.23	0.5607	12309321142.8174	0.0256	84894.4	670.031	555663	5318.26	425.499	69.1507	0.7201	6.3118	3.954	25.885	0.2316	0.1618	0.985	0.9162	-0.2775	0.9764	0.1644	24.1193	0.0011
A117	0.7605	79.9342	103.429	126.219	139.775	122.352	147.745	577023	97.7302	0.6183	54579.4	0.0917	560408	261.34	515.246	95137059956.5545	4.0278	124.186	4.5973	1202.54	80.322	336.543	357.861	-18.2367	1208.74	47.6086	384.932	0.4748	82040826988.8888	0.0767	10699.2	239.649	126589	294.596	54.3631	4.2823	0.888	1.3719	2.0384	1.393	0.5711	0.5255	0.9983	0.9749	-0.3191	0.9506	0.4606	15.2634	0.0167
A119	0.8492	30.0402	31.4308	37.2727	40.9583	38.4237	35.5471	16505.1	29.8247	0.7586	4043.3	0.2429	8115.15	489.856	698.443	24900694602.6068	3.4544	97.0038	4.6438	989.912	63.0953	503.11	537.754	384.569	553.902	44.206	552.005	1.3011	13651927796.8957	0.1246	6519.71	77.2129	-6582.78	95.4499	37.553	1.959	0.8199	1.2709	2.1199	2.0517	0.6104	0.5443	0.9944	0.9529	-0.2357	0.8669	0.4524	6.9273	0.0387
A120	0.2078	16.0035	78.5354	28.34	90.8969	31.5942	94.6831	8590.85	24.1026	0.6531	421.183	0.3821	20172.8	433.284	1187.78	38018736153.5614	5.3857	372.747	3.9751	1973.71	243.523	687.117	587.22	129.451	1850.64	165.105	739.761	1.2216	25531703594.0964	0.0339	91933.1	617.981	944740	12891.4	456.846	36.1167	0.8357	4.4279	3.714	17.054	0.3104	0.2251	0.9933	0.9456	-0.1773	0.9139	0.2297	23.8013	0.0015
A121	0.7631	53.0364	66.3669	74.7956	85.5271	70.9777	92.8404	141784	55.9742	0.7459	19159	0.1232	157171	725.511	1050.92	107640129436.094	4.5768	203.423	3.7438	1680.48	120.669	883.973	864.723	330.914	1414.27	77.1388	897.19	0.6734	134547583537.017	0.0485	23353	590.428	21826.9	1007.41	147.684	13.7445	0.8058	2.7782	2.9811	4.6147	0.3788	0.3047	0.9955	0.9544	-0.183	0.8795	0.3077	22.6425	0.0067
A122	0.7301	36.3809	51.454	66.0791	63.5364	56.3104	67.0136	75521.5	50.9586	0.6397	11540.4	0.1885	47772.9	308.937	425.28	15774466065.7483	3.2109	74.73	5.8386	939.876	45.4681	401.472	398.965	113.061	891.835	27.5251	405.92	0.7253	1.27387e+10	0.1311	3286.01	167.93	115469	-167.365	37.6846	1.992	0.8388	0.8944	1.6538	1.1011	0.652	0.6467	0.9984	0.9781	-0.3059	0.9217	0.4815	11.6741	0.0387
A123	0.2739	34.5784	129.838	126.057	58.1337	109.197	128.769	59625.2	49.3093	0.3767	22418.8	0.3347	48775.9	508.946	1717.66	96299807066.761	6.0653	591.937	2.3327	2760.34	364.771	1244.19	1306.51	34.1701	2722.76	251.302	1282.31	-0.4482	99052996309.9962	0.0195	201713	2657.68	3.77303e+06	-20612.4	1211.66	66.3541	0.9031	6.0211	4.0933	31.6714	0.2606	0.1878	0.9949	0.9513	-0.2028	0.9527	0.1931	48.4626	-0.0007
A125	0.7017	68.2694	97.0681	101.418	113.976	119.106	118.95	431081	87.5664	0.5578	47088.8	0.1124	423254	605.888	859.048	210938622291.172	4.2887	160.832	4.6006	1472	91.8313	746.243	713.414	297.079	1269.38	60.6939	775.746	0.7066	212291770195.195	0.0617	15829	402.911	81039	477.802	67.3654	3.7342	0.922	1.2763	2.1695	1.2545	0.5572	0.5176	0.9982	0.9738	-0.3367	0.9622	0.4508	17.5397	0.0141
A126	0.512	18.0892	33.8551	40.9234	22.2261	38.8489	43.5478	15862.1	21.5923	0.4952	3971.87	0.6445	-6565.51	372.277	512.595	6708046031.5056	3.3862	91.5864	3.7267	785.297	51.4621	385.926	397.942	153.468	504.634	42.651	420.956	0.6581	1.58676e+08	0.1137	5456.36	117.851	-50608.7	184.769	20.7823	2.5812	0.7775	1.2016	1.8195	1.7354	0.6158	0.5582	0.9946	0.9526	-0.2284	0.8716	0.4749	10.4431	0.0314
A127	0.1859	19.7143	114.652	29.2323	47.559	42.0547	97.0509	14605.1	22.5955	0.4912	4862.54	0.3813	38551.1	503.514	825.647	8482744088.2135	4.3089	160.127	4.3437	1320.61	121.594	611.217	565.959	139.824	1157.96	71.7816	649.75	1.1458	8392588089.2958	0.0627	21335.7	424.037	90091.5	1094.17	87.799	7.7365	0.8654	1.9084	2.5568	4.4458	0.4976	0.4393	0.9964	0.9638	-0.2433	0.919	0.4002	19.684	0.0093
A128	0.7444	29.7987	32.6257	41.4381	46.7867	39.7712	50.4262	34424.7	30.225	0.6868	5872.59	0.2324	32758.1	500.133	751.935	4625767393.0447	4.0244	87.4454	6.6047	1205.24	86.0253	587.002	587.034	331.625	841.005	43.9505	624.891	1.7331	-4.36769e+09	0.0949	12520.4	151.411	-16051.5	789.688	68.1116	3.3105	0.8356	1.32	2.2069	2.3286	0.5689	0.5346	0.9964	0.9632	-0.2683	0.9232	0.4408	11.7772	0.0234
A129	0.4328	52.5091	123.884	165.64	105.113	214.788	226.01	257428	73.7531	0.3843	52194.7	0.1962	237685	467.264	848.349	103312013316.232	4.5149	197.978	3.3814	1342.24	106.793	629.85	585.985	36.6262	1225.53	85.6962	696.027	0.431	77263988654.689	0.0476	23452.5	680.401	71117.2	782.827	115.089	9.2362	0.8843	2.0808	2.6564	3.1421	0.4728	0.4026	0.9973	0.9643	-0.2363	0.9443	0.3829	24.3047	0.0025
A130	0.7585	58.1664	72.7391	91.1996	81.7497	100.515	103.123	221284	69.2278	0.6223	25691.7	0.1183	249723	613.944	945.081	139214433550.741	4.5744	168.927	10.4549	2109.67	112.005	792.255	742.97	70.8226	2134.15	69.3993	790.688	2.0431	131016597438.377	0.0538	24443.3	747.066	171896	2998.56	129.55	8.5291	0.8816	1.6437	2.4812	4.0903	0.5358	0.4775	0.9992	0.9801	-0.2966	0.965	0.4288	28.7118	0.0116
A132	0.8088	50.9039	66.9003	70.1926	74.337	70.9338	78.7598	119685	58.7817	0.6716	17044.7	0.1543	157650	570.95	894.791	61398391598.4222	4.2912	131.804	7.5134	1801.77	101.474	714.718	700.286	231.859	1512.52	53.6086	711.705	1.8091	56078687513.6622	0.0678	18790.7	485.258	29638	1921.7	103.789	5.154	0.9033	1.6997	2.4346	3.7532	0.5476	0.4914	0.9984	0.9749	-0.2834	0.9504	0.4411	19.3294	0.0135
A133	0.779	27.7545	36.6066	41.2712	45.0995	43.3817	45.0502	1025.92	30.4695	0.6099	6965.94	0.2937	-1033.19	1351.15	1925.03	44249187689.2754	5.2602	283.981	6.1891	2562.12	190.2	1591.35	1524.72	124.968	2375.42	120.701	1616.92	-0.0808	44957368318.8826	0.0357	69369.7	3553.14	844495	-457.23	347.829	27.242	0.8567	3.6349	3.3084	12.1642	0.3682	0.2948	0.9975	0.9667	-0.2245	0.9402	0.2811	57.9484	0.0023
A134	0.6703	23.3563	30.8126	44.1794	27.7327	33.443	45.1453	22557.6	25.7885	0.5448	3281.76	0.3997	22482.8	941.958	1278.76	15195362015.2929	4.5564	194.108	3.9507	1655.56	107.373	1106.7	1080.29	383.898	1328.78	75.4822	1121.8	0.3164	12667632465.1092	0.0508	19701.2	942.27	-33607.4	802.868	104.305	8.5509	0.832	2.3366	2.7987	4.8832	0.4265	0.36	0.9962	0.9598	-0.2242	0.9191	0.3457	29.8873	0.0085
A135	0.1359	16.7353	115.676	24.4858	28.7374	68.0362	83.5029	13175.8	20.0801	0.519	5415.03	0.4641	-11379.7	538.914	1156.78	20147684985.6914	4.9276	214.249	4.5735	1664.71	173.41	741.079	718.748	311.73	1393.82	99.2844	831.109	1.1969	28457241478.9859	0.0493	57989.5	338.437	319336	5979.68	258.33	23.9571	0.8347	3.0422	3.1201	13.0219	0.4246	0.3422	0.993	0.9504	-0.2333	0.9414	0.3302	17.5083	0.0077
A136	0.5486	51.894	96.9829	144.174	75.7268	136.18	145.434	163110	64.3156	0.4057	38892.7	0.19	188823	259.313	546.278	22196942755.7341	3.8402	114.612	4.6766	1681.69	73.6395	372.212	395.215	47.9873	1598.97	49.3801	416.425	-0.1147	41246291455.6341	0.0815	9880.92	201.13	-50001.7	-119.407	36.1049	4.0591	0.8946	1.1944	1.9781	0.0446	0.5995	0.5652	0.9995	0.9827	-0.319	0.9516	0.4771	14.2804	0.0141
A137	0.6927	21.0378	29.8115	32.7397	38.446	36.9507	40.5786	44745.3	26.5003	0.6149	1492.26	0.3828	3095.1	242.052	977.725	-1.33805e+10	5.3025	393.009	3.5786	1703.08	244.373	527.394	389.948	13.188	1636.55	165.985	601.246	1.0963	10231633292.0596	0.0327	90336.1	435.134	867277	11187	417.332	38.654	0.832	4.3214	3.6162	19.9003	0.3575	0.258	0.9913	0.9445	-0.1974	0.9273	0.2685	17.8881	0.0034
A138	0.6454	11.1566	20.1614	18.2248	20.4594	22.4276	16.8708	6672.2	12.9919	0.5899	-817.706	0.7075	-11290.7	977.462	1492.23	-1.39621e+10	5.1454	282.43	2.7515	1909.78	162.717	1253.82	1226.18	664.997	1259.23	109.322	1222.46	0.0302	15676170866.1713	0.0335	39055.7	551.727	154815	91.939	219.688	17.527	0.8373	3.4133	3.2807	7.6919	0.3429	0.2572	0.9918	0.9369	-0.2401	0.9467	0.2684	21.7468	0.0011
A139	0.1961	17.302	99.0852	26.2834	23.9532	23.8734	122.497	-28466.9	20.1231	0.6158	528.102	0.4673	14681.9	787.842	1221.73	-6.14481e+09	4.7515	212.455	3.7235	1723.82	139.88	976.915	912.848	330.843	1340.37	90.0984	960.148	0.6294	18056990158.2977	0.0472	31473.2	785.749	159882	1757.58	150.546	14.4452	0.8348	2.714	2.957	5.8554	0.4081	0.3472	0.9961	0.9584	-0.2223	0.9275	0.3339	26.2328	0.0098
A140	0.6862	55.318	77.0459	95.0213	83.6373	101.301	97.9535	173084	70.704	0.5654	31258.9	0.1455	212837	494.959	803.353	89887025547.2922	3.9789	110.656	8.3515	1433.32	85.5096	605.072	569.621	163.102	1410.51	46.9098	666.023	1.8307	89050940037.035	0.0822	16176.5	324.038	20122	1767.33	96.2426	5.3491	0.9217	1.3079	2.1039	2.666	0.5958	0.5586	0.9987	0.9794	-0.3247	0.9602	0.4581	17.4126	0.0199
A141	0.4507	28.5174	75.6646	83.7191	72.8975	77.4551	109.525	56756.1	49.9625	0.4834	17678.8	0.2578	65925.6	559.315	1079.28	44928717719.9247	4.8099	260.108	3.9814	2517.49	146.02	777.433	760.937	277.046	2335.49	106.341	799.037	0.7323	27279394184.4872	0.0401	32217.7	483.044	105677	2134.69	210.166	7.0188	0.9279	1.8199	2.5187	3.0773	0.5064	0.4824	0.9988	0.9816	-0.3395	0.9813	0.4254	21.0659	0.0069
A142	0.6432	28.8048	40.9099	57.5646	45.9593	45.62	51.9475	37922.1	31.78	0.6044	8197.88	0.2688	-20425.1	636.251	1046.79	24276867680.4048	4.7984	218.326	3.6147	1590.55	130.542	821.488	797.596	187.673	1404.34	84.2759	846.64	0.6041	28232301129.8227	0.0427	25809.7	657.838	109836	896.058	149.401	10.5475	0.8429	2.4876	2.8921	5.8216	0.4515	0.3648	0.9968	0.9611	-0.2277	0.9254	0.3468	25.7563	0.0057
A143	0.6673	28.1396	44.085	46.8721	39.8851	41.7461	47.5568	29401.1	40.9997	0.7878	4846.96	0.2016	30078.4	525.7	1538.14	35151601034.6406	5.5548	430.673	4.4289	2704.36	309.025	867.111	734.129	144.337	2593.82	197.647	965.614	1.4309	28846223462.3401	0.0288	158110	1060.13	3.37126e+06	36166.9	823.161	52.8236	0.8829	5.2604	3.889	25.9498	0.2969	0.2091	0.9952	0.9544	-0.1869	0.9236	0.2131	28.4897	0.0032
A144	0.6366	37.6133	61.9582	57.4386	65.4622	74.1194	80.7643	95940.3	48.8833	0.7692	12463.5	0.154	78137.3	561.102	916.913	38290454060.4542	4.4481	143.741	10.833	1779.67	98.717	726.978	684.761	204.402	1634.31	62.1734	758.446	1.9273	49145186809.7412	0.0603	21110.2	542.698	274936	3101.11	122.074	9.847	0.8531	2.1812	2.7865	5.1557	0.4589	0.3738	0.9977	0.97	-0.2054	0.9095	0.3747	21.9319	0.0078
A145	0.2768	15.4329	57.4332	57.0602	38.9532	64.3678	67.7662	-14254.4	26.0961	0.4979	7058.98	0.4781	14300.4	162.283	653.066	-1.37563e+09	4.7819	255.561	3.6232	1141.1	154.025	392.612	375.721	36.8094	1172.96	103.301	433.237	0.9755	-7.76134e+09	0.0438	42338.3	246.218	110493	2527.92	209.792	19.1111	0.8039	3.2089	3.1981	9.6527	0.3728	0.2928	0.9907	0.9387	-0.1943	0.9124	0.3049	14.3163	0.0037
A146	0.7717	48.1308	64.9765	69.4386	79.484	65.5248	76.8848	145441	56.888	0.8549	15068.7	0.1124	136548	453.595	765.233	76162531081.9833	4.4998	181.227	4.0429	1357.58	105.526	628.61	601.561	205.03	1291.58	73.7962	660.422	0.4588	53614295198.1667	0.053	14855.7	328.065	-20086.7	672.244	113.89	7.5213	0.9115	1.5571	2.3165	2.6165	0.5162	0.459	0.9978	0.9696	-0.313	0.9614	0.4339	17.6086	0.0126
A147	0.8192	40.1072	50.6054	57.771	46.2487	56.1588	52.2392	55552.9	44.6469	0.8486	7006.84	0.1322	39639.4	287.61	607.887	32632275700.8324	4.0786	155.324	4.4479	1234.09	97.5568	378.602	387.273	81.5709	1168.37	70.6436	400.287	1.1975	12492005263.0677	0.0766	15567.2	224.736	110961	928.041	60.4341	7.6695	0.8117	1.8199	2.5585	4.5718	0.4975	0.4147	0.9961	0.9614	-0.2116	0.8865	0.406	13.9367	0.0149
A148	0.7427	26.804	40.0695	46.5646	45.954	45.1699	47.6222	20056.2	38.2075	0.7755	5198.48	0.1869	35330.8	640.48	947.514	19366996766.9479	4.3437	150.41	7.0441	1744.61	101.639	792.104	735.25	247.347	1387.41	62.8794	816.602	1.2397	26046358275.3954	0.0608	15733.8	477.441	173486	1718.64	130.791	9.1667	0.864	1.9851	2.6457	3.0215	0.4693	0.3822	0.9973	0.9663	-0.2402	0.9234	0.3762	20.7641	0.0073
A149	0.5931	41.1654	70.6638	55.3039	91.7861	171.317	175.619	46810.5	50.7583	0.6082	9507.76	0.2384	34601.3	461.828	1131.4	21671111404.2237	5.4067	399.555	2.9514	1863.15	214.617	762.655	788.124	-41.9233	1910.87	155.104	818.337	0.2675	12842971172.4931	0.0308	66460.6	1148.81	351383	1919.99	382.015	24.8702	0.8748	3.242	3.2973	13.4388	0.3727	0.2869	0.9961	0.961	-0.2441	0.9541	0.2994	32.1967	0.0029
A150	0.6228	55.8623	92.3697	104.708	108.128	94.9391	122.225	283353	75.0336	0.7256	31374.2	0.0949	290993	340.821	746.354	126802804882.114	4.7004	226.518	4.1635	1588.49	135.181	577.222	555.156	-11.7035	1610.7	94.8919	619.145	0.4676	85787042648.1765	0.042	28424.2	608.402	44727.7	895.998	155.465	9.5559	0.8474	2.7035	2.9637	4.4852	0.4045	0.3293	0.9971	0.9605	-0.2117	0.9218	0.3243	24.4376	0.004
A151	0.634	33.6336	56.4275	50.4344	56.6895	54.0433	59.8774	59507	41.7183	0.6846	10167.9	0.1925	54555.6	489.195	937.717	33821974631.9715	4.7024	181.367	7.8727	2104.61	149.605	704.237	622.46	234.881	1934.65	81.327	704.612	1.9418	23874825982.2469	0.0436	41551.6	325.094	329068	5605.73	206.977	26.1298	0.7664	3.3331	3.293	14.2044	0.389	0.3003	0.9956	0.9597	-0.1406	0.8426	0.2895	17.2058	0.0061
A152	0.1687	21.6691	126.876	29.911	113.59	95.3231	118.835	4676.87	24.2372	0.5021	5694.8	0.3906	-16366	538.008	924.008	7075273157.2126	4.4941	169.561	5.7558	1546.04	119.977	687.896	679.343	115.67	1445.1	70.9092	687.614	1.1885	-3.15267e+10	0.053	28561	663.81	90324.9	2042.96	145.26	7.1282	0.8734	2.1405	2.6068	4.1538	0.4731	0.4294	0.9978	0.9683	-0.2636	0.946	0.3933	24.4448	0.0075
A153	0.7767	53.4335	65.4635	81.0972	77.1877	75.5596	79.6327	159920	65.786	0.6213	23656.1	0.1542	200113	502.447	702.707	43941155117.0028	3.725	86.6706	7.4957	1284	63.1172	566.179	575.119	7.6028	1342.98	37.9908	573.263	1.1856	61372177771.7037	0.097	11771.1	556.444	42715.8	781.514	48.7248	4.1762	0.8863	1.0384	1.9881	2.0423	0.6118	0.5923	0.9989	0.9804	-0.3222	0.9393	0.4495	23.5493	0.0266
A155	0.7169	58.2205	79.109	96.6284	83.6805	90.5144	99.9458	264288	78.243	0.5727	35519.9	0.1295	216797	388.719	550.712	75337792003.5064	3.3722	65.8727	5.9875	878.773	53.3509	457.325	450.263	33.3118	884.993	29.8281	434.327	-0.3864	16594761134.0879	0.1216	6126.39	272.594	-12227.3	265.326	-11.6264	1.7127	0.8269	0.9105	1.8197	1.3413	0.6163	0.5746	0.9978	0.9706	-0.2687	0.9007	0.4769	18.0459	0.0295
A156	0.6433	47.7732	70.7818	76.2526	86.7382	89.0612	90.6476	123862	60.5416	0.6085	19943.3	0.1561	147125	309.463	529.61	40721295849.3095	3.863	107.748	3.8954	896.234	71.4411	427.835	409.26	1.3411	859.505	41.7522	452.772	0.6306	27374367010.6893	0.0852	7878.77	312.818	30085.5	787.366	48.7571	2.9027	0.8882	0.977	2.0285	1.5336	0.5823	0.5551	0.9982	0.9691	-0.3172	0.9517	0.4541	16.1078	0.0192
[truncated: 801 more columns]

## Sheet: omics features average 
name	Glypican-3	Flatness	LeastAxisLength	MajorAxisLength	Maximum2DDiameterColumn	Maximum2DDiameterRow	Maximum2DDiameterSlice	Maximum3DDiameter	MeshVolume	MinorAxisLength	Sphericity	SurfaceArea	SurfaceVolumeRatio	VoxelVolume	10Percentile	90Percentile	Energy	Entropy	InterquartileRange	Kurtosis	Maximum	MeanAbsoluteDeviation	Mean	Median	Minimum	Range	RobustMeanAbsoluteDeviation	RootMeanSquared	Skewness	TotalEnergy	Uniformity	Variance	Autocorrelation	ClusterProminence	ClusterShade	ClusterTendency	Contrast	Correlation	DifferenceAverage	DifferenceEntropy	DifferenceVariance	Id	Idm	Idmn	Idn	Imc1	Imc2	InverseVariance	JointAverage
A1	1	0.705287	82.0857	116.386	128.577	128.316	108.245	130.545	597160	87.3168	0.741353	46257.9	0.0774633	597300	518	1047	3.77E+11	4.97214	302	2.2727	1434	164.51	769.112	754	126	1308	123.635	794.017	0.228434	3.77E+11	0.0347788	38929.3	748.083	134630	854.056	244.411	3.24933	0.973746	1.23937	2.06897	1.65476	0.584155	0.543355	0.998852	0.977694	-0.446123	0.9932	0.45731	26.2258
A2	1	0.692007	41.5036	59.9758	71.1969	66.8506	57.0088	72.753	82090.5	47.428	0.770279	11858.5	0.144457	82158	1038	1473	1.30E+11	4.843	204	4.23175	2127	135.588	1243.44	1228	514	1613	87.0177	1256.44	0.569962	1.30E+11	0.0439422	32491	949.628	147289	1389.18	185.735	14.3922	0.855907	2.83444	3.02355	6.083	0.390788	0.306968	0.996744	0.960043	-0.209141	0.920814	0.310992	30.113
A3	1	0.711748	25.1397	35.321	40.2492	41.6773	37.9473	41.9762	20295.5	31.9638	0.810125	4441.53	0.218843	20334	594	886	10720370057	4.12329	128	4.15683	1239	88.8961	716.557	692	374	865	56.5779	726.095	1.00854	10720370057	0.0736776	13760	231.523	19946.8	544.206	66.8058	6.91968	0.809632	1.85251	2.54091	3.39455	0.497043	0.436646	0.994814	0.9532	-0.215374	0.895075	0.405826	14.7153
A4	0	0.518583	67.0015	129.201	151.476	133.69	114.481	159.894	130632	81.9874	0.403251	30875.2	0.236352	130897	90	161	2077534330	2.21373	40	2.80467	259	22.824	122.897	119	45	214	16.9331	125.982	0.445186	2077534330	0.245526	767.8	20.4367	64.5624	4.0494	4.82618	0.193482	0.922715	0.190845	0.705044	0.155741	0.905015	0.904841	0.998086	0.98267	-0.606879	0.962879	0.18856	4.39072
A5	0	0.653931	63.1306	96.5402	106.283	102.859	85.0882	109.95	285425	67.1118	0.771542	27171.8	0.0951979	285526	397	657	78198296010	4.0083	98	7.87532	1391	80.5478	509.951	490	80	1311	44.9871	523.33	1.61805	78198296010	0.0869131	13824.3	336.888	52485.5	1195.22	80.4185	2.95205	0.928804	1.11604	1.98793	1.66047	0.619051	0.585582	0.998958	0.979918	-0.362099	0.967492	0.451334	17.8191
A6	1	0.871018	19.7749	22.7032	27.313	25.5539	25.4951	28.3019	6547.25	20.6812	0.819007	2066.5	0.315629	6574	663	1030	4510136910	4.40096	172	3.82565	1443	112.481	815.554	782	523	920	74.7878	828.285	1.02742	4510136910	0.058484	20928.4	174.927	38724.7	998.545	96.3686	11.7043	0.779949	2.45604	2.86987	5.48264	0.434283	0.361045	0.992196	0.942285	-0.193358	0.884892	0.354793	12.3989
A7	0	0.30496	13.8302	45.3508	34.0588	49.6488	45.5412	49.7393	10578.1	27.6007	0.576531	4042.04	0.382113	10624	554	920	5900000000	4.46183	194	2.77769	1226	111.445	732.351	725	424	802	80.2097	745.231	0.391946	5900000000	0.051022	19030.6	197.525	27669.5	338.907	100.558	7.76036	0.855285	2.07126	2.60439	3.23539	0.458378	0.387483	0.993469	0.944938	-0.24923	0.927716	0.37729	13.2023
A8	1	0.587998	17.2383	29.3169	34.3657	35.7351	32.28	37.108	9259.08	27.0216	0.702864	3033.83	0.32766	9296	675	943.5	6040000000	4.13713	136	4.17094	1113	84.8014	798.47	793	258	855	56.6022	806.139	-0.3961	6040000000	0.070198	12305.2	519.59	17458.7	-87.3895	68.0959	3.71422	0.89552	1.38578	2.14955	1.68981	0.551078	0.502731	0.997012	0.963152	-0.3195	0.954284	0.45202	22.4386
A10	1	0.391072	20.8528	53.3222	61.5873	63.6396	62.6498	67.0895	27423.6	46.9735	0.472959	9298.43	0.339067	27516	631	1491	33700000000	5.72922	407	3.06256	2252	254.788	1056.34	1037	35	2217	171.661	1106	0.191269	33700000000	0.0228395	107380	1847.18	1.00515e+06	2617.8	562.397	27.5297	0.905326	3.74345	3.42659	13.0759	0.351236	0.265404	0.996668	0.961443	-0.25654	0.967329	0.268465	41.3936
A11	1	0.695311	92.268	132.7	231.277	173.401	235.136	235.138	940626	120.369	0.447615	103719	0.110266	940699	962	1760	1.80E+12	5.83148	427	3.16726	3022	248.073	1346.24	1331	40	2982	175.65	1381.61	0.420891	1.80E+12	0.0203279	96470.1	3840.97	1.84653e+06	9248.73	769.635	12.1577	0.968864	2.48125	2.86349	5.75839	0.425583	0.348606	0.999356	0.982501	-0.366133	0.991703	0.344963	60.4284
A12	1	0.57967	46.3647	79.9847	87.0919	91.8368	91.3947	95.7601	124188	50.1374	0.593427	20284.8	0.163339	124350	41	179	1610000000	2.85787	97	1.9765	289	47.4442	100.353	83	0	289	38.9724	113.93	0.527049	1610000000	0.155887	2909.22	24.0284	652.098	41.9306	17.9454	0.372314	0.959274	0.302984	0.971919	0.277675	0.858393	0.855258	0.997465	0.977058	-0.58774	0.980696	0.256815	4.43108
A13	1	0.615826	55.8859	90.7494	95.7706	96.4261	88.1022	105.385	238186	66.7835	0.725142	25625.5	0.107586	238286	244	310	18500000000	2.26139	33	7.46001	511	21.9737	276.969	275	120	391	13.9763	278.645	1.1385	18500000000	0.26338	931.33	58.7549	187.393	11.8381	5.3679	0.298544	0.893965	0.270404	0.884557	0.222895	0.86901	0.867581	0.998973	0.985058	-0.51407	0.944646	0.250078	7.58205
A14	1	0.686496	27.3248	39.8034	41.0531	46.5138	45.11	47.1216	26950.4	35.7281	0.699724	6212.52	0.230517	27022.3	1205	1995	60298424111	5.64795	432	3.01228	2516	250.327	1572.92	1551	298	2218	178.751	1603.27	0.0507368	69460482068	0.0230413	96395.9	2783.49	962586	910.776	556.972	31.4951	0.891869	4.12406	3.48815	13.1126	0.330814	0.243607	0.996178	0.957662	-0.243233	0.955379	0.247578	51.4973
A15	1	0.648797	27.3682	42.183	49.5177	44.4072	39.9249	49.7695	23998	30.9469	0.624348	6444.28	0.268534	24052	1440	2858	1.15E+11	6.45628	762	2.55598	3787	439.254	2121.97	2096	448	3339	316.324	2189.2	0.120475	1.15E+11	0.01283	289875	5256.29	6.75695e+06	7060.43	1630.13	162.973	0.817938	9.39925	4.6617	71.0845	0.20126	0.11861	0.991403	0.937986	-0.16228	0.926443	0.123517	69.9234
A16	1	0.788877	12.5404	15.8966	17.0294	18.6011	18.4391	20.2485	1746.96	13.1799	0.762985	919.369	0.526269	1766	470	1022.5	947000000	4.98544	290	2.66454	1358	172.728	701.153	657	166	1192	124.47	732.149	0.589432	947000000	0.0373829	44426	513.226	134933	2265.8	213.8	28.1797	0.765038	3.94142	3.45582	12.0939	0.332595	0.2431	0.988827	0.929376	-0.19787	0.915192	0.245963	21.6044
A17	1	0.85613	81.9984	95.778	104.178	111.018	117.184	121.116	476256	85.9551	0.793307	37176.6	0.0780601	476373	417	880	2.04E+11	4.8702	235	4.11452	2055	145.674	627.364	598	28	2027	98.79	654.635	0.833312	2.04E+11	0.0413843	34961.2	638.693	159962	2365.9	196.586	16.4453	0.845272	3.08195	3.12079	6.64798	0.37032	0.282834	0.997579	0.964664	-0.18942	0.905177	0.288226	24.365
A18	1	0.709562	17.503	24.6673	27.0327	24.9961	28.7795	30.4851	5606.39	19.0398	0.716865	2128.97	0.37974	5640.12	919	1397	7450000000	4.9421	251	3.1114	1895	149.921	1159.48	1153	621	1274	104.831	1174.61	0.185384	7780000000	0.038097	35301.3	509.8	110146	477.226	184.204	18.7839	0.81123	3.37409	3.14124	6.48001	0.351065	0.261472	0.993203	0.941237	-0.20965	0.910331	0.264833	21.6363
A19	1	0.633764	71.0231	112.066	117.801	125.575	131.32	133.375	490724	94.2863	0.732714	41062.1	0.0836766	490857	585	1156	3.89E+11	5.20719	299	3.47201	1974	179.958	860.839	844	77	1897	124.094	890.665	0.522944	3.89E+11	0.0319731	52239.5	1091.93	343287	3071.83	315.266	21.6811	0.871345	3.54425	3.2976	8.66955	0.343378	0.253032	0.996303	0.956753	-0.20639	0.930731	0.259533	31.9145
A20	1	0.105546	14.5605	137.953	110.354	105.233	34.4384	125.877	12429.2	32.9429	0.531046	4886.31	0.393131	12496	552	1284	9980000000	5.30877	414	2.52668	1663	233.398	849.135	770	220	1443	173.993	893.754	0.694666	9980000000	0.0300725	77765.9	758.122	528206	7401.97	439.253	21.3523	0.906427	3.37521	3.25967	9.31496	0.371816	0.288862	0.994022	0.948158	-0.25196	0.955671	0.285472	25.5652
A21	1	0.853728	28.5558	33.4484	40	37.7359	36.7696	40.3113	21305.7	31.5139	0.76203	4877.25	0.228918	21344	615	1146	15600000000	4.88781	241	4.28819	1818	163.94	827.163	769	388	1430	106.274	854.174	1.21846	15600000000	0.0433789	45415.3	369.722	251531	4642.03	229.702	21.3219	0.828077	3.45064	3.29243	9.09028	0.353952	0.265839	0.993835	0.946042	-0.17312	0.886072	0.270604	17.8206
A22	1	0.877196	30.7969	35.1084	41.6773	43.1856	38.3275	44.1475	26101.8	33.8833	0.821778	5178.18	0.198384	26142	401	512	5476831752	2.85897	58	3.19198	640	34.5543	455.63	454	320	320	24.1371	457.715	0.334835	5476831752	0.161908	1904.1	46.3264	349.467	11.4813	10.3837	1.3917	0.762784	0.858791	1.59455	0.62119	0.647827	0.623037	0.993065	0.944894	-0.242207	0.841525	0.496003	6.6391
A23	1	0.149438	25.3279	169.488	60.8769	39.1152	157.309	160.059	24962.4	31.6695	0.590073	7000.07	0.280425	25002	210	1292	18254155328	5.56006	253	4.34955	2569	267.971	760.377	728	-14	2583	148.686	854.463	0.768398	18254155328	0.033052	151935	1075.5	2.34886e+06	10511.4	726.742	69.6929	0.822964	4.8089	3.71825	46.0688	0.360625	0.284019	0.99404	0.958973	-0.230699	0.953211	0.282259	30.1841
A24	1	0.804682	11.7822	14.6421	17.8885	16.763	17	18.3303	1596.17	13.9452	0.775628	851.562	0.533505	1614	792	1118	1460000000	4.28202	182	2.47324	1332	101.085	942.949	928	670	662	74.522	950.857	0.346173	1460000000	0.057466	14977	142.536	13758.6	255.943	71.1283	10.6367	0.73588	2.50701	2.82706	4.17283	0.411489	0.329546	0.987019	0.921856	-0.18387	0.86964	0.324989	11.2853
A25	1	0.812814	18.4877	22.7453	26.2488	27.5862	24.3516	28.0357	6125.62	20.5801	0.817602	1980.2	0.323265	6152	671	1000	4253199746	4.34832	136	5.10403	1433	101.295	819.369	800	475	958	59.5898	831.476	1.18166	4253199746	0.064379	19986.8	211.287	46830.7	1011.4	94.0362	11.2031	0.784417	2.33871	2.8107	5.47628	0.451859	0.382711	0.992919	0.946311	-0.202075	0.88727	0.366797	13.8046
A26	1	0.482863	29.502	61.0981	64.3506	57.2713	40.025	71.3933	38934.4	31.5754	0.726071	7651.16	0.196514	38990	1158	1525	70500000000	4.60368	195	4.04319	2177	117.156	1336.18	1328	573	1604	81.1689	1344.52	0.268541	70500000000	0.049034	22347	1051.48	68461.8	496.014	130.35	11.2071	0.841546	2.49578	2.84801	4.73413	0.415921	0.335991	0.997459	0.964535	-0.21315	0.914753	0.336914	31.964
A27	1	0.87262	98.9807	113.429	119.57	130.096	123.822	133.839	833211	103.173	0.779075	54963.5	0.0659659	833358	310	737	2.45E+11	4.75297	237	8.60459	2416	139.998	511.017	483	18	2398	97.8641	542.451	1.43477	2.45E+11	0.0436789	33114.7	474.775	242453	3027.03	186.291	8.16016	0.915685	1.99819	2.57615	4.01893	0.469517	0.400956	0.999143	0.980206	-0.297689	0.964464	0.3878	20.7422
A28	1	0.910399	66.2629	72.7844	86.7295	89.8276	84.8999	92.0054	247376	71.7297	0.772087	24682.6	0.0997773	247497	491	864	1.16E+11	4.59808	199	7.15154	2403	119.793	667.502	649	79	2324	82.3713	685.538	1.11575	1.16E+11	0.0493328	24403.1	609.649	102305	1403.59	134.222	9.81967	0.863138	2.1528	2.69841	5.03142	0.460852	0.391723	0.998903	0.978124	-0.246171	0.937926	0.379804	24.053
A29	1	0.658246	0.658246	0.658246	0.658246	0.658246	0.658246	0.658246	0.658246	0.658246	0.658246	0.658246	0.658246	0.658246	0.658246	0.658246	0.658246	0.658246	0.658246	0.658246	0.658246	0.658246	0.658246	0.658246	0.658246	0.658246	98.8706	749.353	1.34943	2733531064	0.0454936	40314.3	380.767	199608	3549.88	184.879	25.5363	0.753796	3.60924	3.3682	12.1792	0.3543	0.267643	0.992973	0.945069	-0.168629	0.879807	0.272266	18.4621
A30	1	0.595716	34.6431	58.1536	64.4981	57.7062	49.2544	66.2193	52891.4	39.8123	0.776792	8772.09	0.165851	52951	507	986	31306476052	4.94644	248	3.39259	1650	149.21	745.479	738	128	1522	103.822	768.918	0.321751	31306476052	0.0379462	35496.6	684.505	139624	823.896	206.67	17.3564	0.84497	3.11537	3.15368	7.38402	0.371727	0.285064	0.995577	0.953771	-0.200325	0.920175	0.290029	25.2423
A31	1	0.723505	27.6476	38.2135	41.4005	46.0109	40	47.7598	22497.9	30.5714	0.761373	5061.91	0.224995	22540	848	1202	23765079130	4.60653	159	12.2545	2858	115.665	1012.67	997	307	2551	68.136	1026.82	1.50509	23765079130	0.0556038	28858.3	856.608	267677	2426.33	150.637	13.2253	0.837095	2.35018	2.82139	7.50674	0.456142	0.387926	0.998776	0.978314	-0.238357	0.931729	0.372759	28.6749
A32	1	0.717649	20.7262	28.8807	28.4253	33.6155	33.0606	33.7491	8810.92	22.8765	0.741805	2781.05	0.315637	8841	631	904	5161958543	4.0737	146	3.10212	1243	84.353	756.855	743	469	774	59.9182	764.111	0.5339	5161958543	0.0690199	11036.4	164.508	9039.02	195.428	54.5732	8.17963	0.737735	2.06762	2.63876	3.79064	0.46063	0.390749	0.992366	0.942173	-0.173904	0.850657	0.384181	12.3652
A33	1	0.824011	45.913	55.7189	67.4166	66.3099	65.192	69.3758	100997	55.4706	0.777939	13481.7	0.133486	101077	523	817	47158840177	4.32955	144	10.2771	1823	102.018	666.835	643	207	1616	61.1429	683.055	2.02496	47158840177	0.0643902	21895.2	380.735	116256	2060.31	106.064	9.94454	0.826223	2.1004	2.6799	5.40997	0.475419	0.410873	0.997696	0.969789	-0.217363	0.906916	0.392542	18.8865
A34	1	0.4422	52.5495	118.837	151.954	139.316	171.05	205.492	17401.1	84.0235	0.438169	7411.29	0.42591	17577	646.6	1132	13507221752	4.88484	235	3.51361	1871	149.78	855.562	819	285	1586	101.148	876.619	0.753191	13507221752	0.0415503	36473.2	541.437	85407.4	1372.05	152.508	39.0588	0.589551	4.51054	3.67738	18.3624	0.313046	0.223303	0.990919	0.937528	-0.0927121	0.744621	0.229359	22.6507
A35	1	0.584832	106.503	182.109	202.148	186.936	201.556	216.18	1.81378e+06	142.489	0.674424	106645	0.0587972	1814034	412	808	6.82E+11	4.65325	204	3.72061	2425	124.032	592.7	572	12	2413	85.53	613.283	0.638699	6.82E+11	0.0475399	24822.4	619.301	78752.9	1191.55	146.752	11.0686	0.859661	2.45579	2.85174	4.83961	0.4239	0.346332	0.998854	0.976024	-0.218778	0.922921	0.343318	24.1946
A36	1	0.636632	90.2868	141.819	140.911	170.144	170.423	170.804	880154	108.469	0.382075	116245	0.132074	879893	458	784	3.50E+11	4.36018	193	2.6389	1500	104.899	617.714	614	98	1402	78.3923	630.497	0.0990213	3.50E+11	0.0545122	15956.1	503.858	19777.2	45.7612	89.2371	9.00836	0.816462	2.2621	2.71053	3.67327	0.43582	0.359405	0.997351	0.963451	-0.200432	0.890397	0.354532	21.9954
A37	1	0.501551	15.9612	31.8237	37.5366	26.9258	26.8328	38.923	4537.38	19.4538	0.524053	2529.17	0.557409	4592	551	825	2159397879	4.11486	127	4.80987	1296	84.6343	676.478	662	388	908	54.9989	685.749	0.960121	2159397879	0.0717272	12630.2	154.119	15405.1	379.123	57.8895	9.37652	0.718529	2.2361	2.73274	4.23704	0.443368	0.37005	0.993378	0.945481	-0.161531	0.833991	0.368929	11.9149
A38	0	0.496207	45.5297	91.7554	96.026	103.846	68.2642	105.948	149392	55.3069	0.627657	21692.7	0.145206	149545	770	1176	1.41E+11	4.65699	223	2.85802	1728	127.372	957.417	939	372	1356	91.9993	970.141	0.410958	1.41E+11	0.0455375	24527.3	647.911	54357.7	722.963	140.859	10.8539	0.856664	2.47617	2.84233	4.51487	0.417381	0.337792	0.996589	0.958914	-0.216879	0.920393	0.337783	24.8074
A39	1	0.828752	25.4007	30.6494	34.6699	36.6197	33.9559	38.3275	16122.6	29.5173	0.837428	3685.48	0.22859	16157	620	957.4	10684494150	4.39651	138	3.91299	1323	99.622	801.694	806	372	951	60.1128	813.199	-0.0407904	10684494150	0.0621704	18578.5	352.293	37616.3	-322.436	98.8634	10.4588	0.808128	2.35074	2.81277	4.78014	0.436559	0.361952	0.993352	0.94566	-0.195258	0.89212	0.355848	18.171
A40	1	0.676971	27.0484	39.955	40.2244	44.1022	46.3249	46.3357	24445.9	31.798	0.833417	4887.57	0.199934	24486	477	1099.5	15040201801	5.23764	311.75	3.91766	2052	195.038	743.185	691	42	2010	132.509	783.733	0.907535	15040201801	0.0326458	61912.6	881.93	450460	5830.82	329.242	26.5413	0.849906	3.91443	3.44768	10.8013	0.325971	0.234716	0.996115	0.955817	-0.187859	0.915809	0.242195	28.394
A41	1	0.653052	32.6522	49.9993	51.7397	53.2541	49.4773	57.7321	46824.2	40.2845	0.760183	8264.42	0.176499	46886	674	1026	34850850863	4.50521	176	3.27164	1492	107.892	851.112	851	213	1279	73.9183	862.155	0.0333172	34850850863	0.0523998	18919.2	720.469	37161	15.3949	108.207	6.75843	0.882057	1.9331	2.5413	2.89952	0.470987	0.402735	0.997528	0.965116	-0.261345	0.943543	0.392689	26.3649
A42	0	0.783721	34.4459	43.9517	50.2494	48.5489	49.0306	51.1077	46814.2	42.974	0.842866	7452.65	0.159196	46864	970	1220	57155128958	4.0712	126	4.6989	1572	79.1876	1099.41	1105	490	1082	52.7158	1104.35	-0.318389	57155128958	0.0734645	10885.2	672.194	15681	-81.1194	59.0345	5.37416	0.832334	1.7074	2.38569	2.36802	0.497301	0.435013	0.997263	0.963719	-0.230098	0.907018	0.41763	25.6667
A43	1	0.543029	37.7168	69.4564	80.4984	74.7262	70.6045	82.9699	92271.6	56.3819	0.564778	17484.5	0.189489	92376	916	1476	1.36E+11	5.18263	310	2.97861	2081	177.788	1191.69	1187	313	1768	126.595	1212.03	0.190747	1.36E+11	0.031853	48898	1360.05	246037	863.978	288.042	16.3282	0.892514	2.98165	3.09619	7.09825	0.384572	0.30043	0.996898	0.961435	-0.241766	0.950957	0.302402	35.946
A44	1	0.389514	10.905	27.9965	37.5899	27.5136	21.587	39.064	2844.29	17.8907	0.575717	1686.26	0.592857	2878	657	862	1640387218	3.68211	94	5.18348	1210	63.1256	750.271	738	528	682	41.0188	754.967	1.07404	1640387218	0.0972738	7068.11	92.3633	6405.72	209.924	34.2881	3.80553	0.797073	1.43954	2.1897	1.67974	0.535975	0.483875	0.995241	0.952907	-0.226966	0.884267	0.450011	9.20518
A45	1	0.693615	45.9325	66.2219	69.029	72.8354	73.3757	77	102142	49.635	0.544627	19402.4	0.189955	102054	738	1395	1.07E+11	5.25048	260	4.18097	2227	197.169	989.363	933	104	2123	120.312	1024.47	0.863602	1.07E+11	0.036023	70705.6	1353.86	604808	6518.92	368.179	13.8321	0.926394	2.54905	2.94726	7.12867	0.439723	0.369103	0.998152	0.97207	-0.29603	0.972159	0.354188	35.5703
A46	1	0.636913	16.7272	26.263	30.5941	26.2488	29.7321	31.0805	6360.38	21.3936	0.757483	2191.62	0.344575	6388	597	837	3254351299	4.00563	118	4.31129	1052	76.5781	706.359	703	262	790	49.6316	713.756	-0.438511	3254351299	0.0783383	10504.6	370.919	12185.7	-92.4557	54.2479	5.6803	0.808622	1.78193	2.4364	2.4019	0.4891	0.42449	0.994888	0.950635	-0.225025	0.898828	0.403695	18.9413
A47	1	0.821927	25.7238	31.2969	36.7696	35.9026	34.4384	38.1051	15488.9	27.8323	0.813713	3692.84	0.238418	15524	557	1065	10475091272	5.01769	259	3.29463	1694	157.784	796.692	779	183	1511	108.381	821.442	0.47406	10475091272	0.0365457	40049.5	663.769	133263	1380.09	200.836	37.1674	0.686578	4.75436	3.67545	13.8768	0.285911	0.192254	0.990334	0.930646	-0.11072	0.792639	0.199305	24.9568
A48	1	0.554467	25.6913	46.3352	50.3587	44.9444	54.5711	54.7996	24007.2	33.7456	0.626924	6419.44	0.267396	24067	599	1348	23167958314	5.53511	401	2.8223	2102	233.049	937.839	902	115	1987	166.227	981.144	0.390657	23167958314	0.025025	83102.5	1164.77	510698	3229.69	416.774	59.9436	0.747554	5.90699	4.003	24.0425	0.256376	0.165195	0.991176	0.934915	-0.130202	0.855142	0.172374	32.7948
A49	1	0.803866	17.766	22.1007	26.1725	22.2036	26.2488	27.7669	4851.96	18.6833	0.66061	2098.05	0.432414	4882	861	1112	4760835365	3.96459	129	2.77017	1245	76.5741	982.876	982	705	540	53.726	987.513	-0.111584	4760835365	0.0736515	9136.78	143.442	7983.41	-28.0451	52.9754	4.07178	0.856877	1.53463	2.22432	1.62709	0.515565	0.456808	0.991821	0.937552	-0.262821	0.926281	0.431393	11.4542
A50	1	0.557078	9.95174	17.8642	17.0294	19.2354	20.5913	20.8087	1683.79	14.2484	0.752419	909.669	0.54025	1702	1674.1	2051	6022134931	4.54653	215	2.93931	2201	121.399	1875.05	1895	1413	788	86.906	1881.03	-0.558249	6022134931	0.0492757	22444.1	364.283	42150.4	-676.097	120.718	16.7214	0.756494	3.21486	3.0961	5.93406	0.351497	0.259508	0.985352	0.915403	-0.184594	0.888989	0.270033	18.3901
A51	1	0.634892	38.0938	60.0005	56.7539	62.9682	62.7694	66.0379	71044.2	44.5817	0.784346	10576.2	0.148868	71104	948	1893	1.46E+11	5.83688	442	2.90728	2843	277.03	1391.01	1383	164	2679	190.888	1434.83	0.103553	1.46E+11	0.0206264	123824	2746.64	1.65029e+06	866.138	750.097	43.1166	0.891268	4.75718	3.7272	19.6041	0.302928	0.212915	0.996381	0.959246	-0.218821	0.953827	0.218671	50.6939
A52	1	0.723238	46.1329	63.7865	71.0634	68.0147	71.8401	75.3525	115221	54.4034	0.836099	13695.6	0.118864	115290	495	1041	64455472796	4.961	261	4.02424	2021	169.525	715.73	661	123	1898	115.048	747.712	1.0677	64455472796	0.0402746	46803.5	659.903	253361	4254.31	247.875	17.1351	0.869705	2.79141	3.05447	9.13389	0.421707	0.347774	0.997167	0.966326	-0.231509	0.940015	0.341042	24.5398
A53	1	0.739926	19.1899	25.9349	29.8329	28.3019	27.8927	30.5941	7746.29	22.541	0.825525	2293.42	0.296067	7775	576	1138	5447197446	5.00962	266	3.55118	1680	172.019	807.77	757	295	1385	115.318	837.021	0.94921	5447197446	0.0383847	48111.7	478.838	198840	3554.65	223.744	35.2944	0.725372	4.45185	3.63389	15.02	0.306686	0.214988	0.989623	0.931044	-0.131527	0.835071	0.219947	20.7772
A54	0	0.703124	13.9728	19.8725	21.9317	22.3607	17.8045	23.4307	2659.79	14.5166	0.707242	1312.65	0.493515	2684	886	1443	3659408834	5.03866	319	2.27806	1789	174.422	1148.89	1128	701	1088	130.726	1167.65	0.244919	3659408834	0.0332605	43461.7	347.364	130416	1181.99	229.631	20.3767	0.835432	3.51095	3.25202	7.63635	0.341539	0.2506	0.989816	0.929234	-0.220151	0.935255	0.258186	17.1728
A55	1	0.583075	12.2317	20.9779	21.9545	20.3961	17.2047	23.0434	2256.12	13.0561	0.819783	1014.75	0.449777	2276	766.5	1668	3261025477	5.67372	512.75	2.70378	2404	288.944	1144.85	1061	482	1922	211.942	1196.99	0.689445	3261025477	0.02311	122098	742.484	937243	10254.6	557.035	100.443	0.692773	7.17083	4.2976	47.9902	0.252452	0.167849	0.984617	0.921376	-0.20703	0.945403	0.174438	25.0643
A56	1	0.532332	87.3181	164.029	193.298	187.299	193.373	203.718	1.41826e+06	154.211	0.423264	144226	0.101692	1418726	778	1131	1.27E+12	4.46882	185	3.76438	2052	111.999	934.429	911	64	1988	77.2908	945.154	0.719457	1.27E+12	0.0546401	20159.4	1314.35	54177.5	1005.93	122.05	2.69739	0.956687	1.09222	1.92596	1.44894	0.614003	0.580439	0.999591	0.986907	-0.425613	0.986647	0.467837	35.8401
A57	1	0.712771	17.062	23.9376	26.9258	26.4008	27.8568	28.7402	5906.25	20.8619	0.789863	2000.51	0.33871	5934	430.3	894	2510000000	4.75397	213	3.95217	1310	141.725	623.242	582	233	1077	91.7566	649.967	1.03944	2510000000	0.046498	34026.4	269.523	100590	1993.72	152.205	22.0308	0.743309	3.46872	3.31186	9.7433	0.357146	0.27038	0.989163	0.930689	-0.15712	0.859749	0.274617	15.3925
A58	1	0.733131	18.0313	24.5949	29.4279	27.1662	28.4429	29.5804	6976.38	22.8519	0.781832	2258.35	0.323713	7005	324	998	3180000000	5.31794	285	6.91535	2339	214.173	603.589	532	15	2324	125.841	673.447	1.6741	3180000000	0.033925	89211.6	617.42	988234	11620.3	360.227	64.987	0.688625	5.50983	3.94393	34.0228	0.288091	0.198926	0.993049	0.947533	-0.14498	0.869042	0.204328	23.3135
A59	1	0.630439	18.1027	28.7145	31.3209	31.9531	29.1548	32.9393	8184.33	22.7982	0.768303	2556.27	0.312337	8218	770	1087.3	6930000000	4.29097	133	6.72575	1709	102.525	906.935	876	572	1137	59.0057	918.48	1.6454	6930000000	0.068832	21073.2	229.541	80454.3	1807.2	102.739	8.38677	0.845986	2.05911	2.65686	4.02892	0.471038	0.404993	0.996278	0.959572	-0.22583	0.909502	0.389449	14.3505
A60	1	0.178383	15.3836	86.2393	30.0832	29.2746	49.3964	64.6993	7590.21	22.2062	0.648311	2880.95	0.379562	7637	772	1341	8560000000	5.08978	308	3.15628	2060	175.77	1035.61	1013	587	1473	125.492	1058.52	0.626297	8560000000	0.033455	47965.3	370.11	166300	1859.83	232.171	38.7468	0.712843	4.53001	3.67192	17.6978	0.311321	0.221652	0.989784	0.933481	-0.15079	0.870226	0.228219	17.9368
A61	0	0.821787	33.9241	41.281	45.4533	48.1664	48.3736	51.817	37435.6	37.5595	0.803779	6732.93	0.179854	37483	716	1076	30600000000	4.56236	183	3.63223	1896	112.867	891.237	883	295	1601	76.6697	902.909	0.371197	30600000000	0.05084	20940.1	645.532	47810.6	516.949	113.504	15.3157	0.761803	2.90069	3.05789	6.6637	0.386244	0.301436	0.996444	0.958624	-0.15724	0.855924	0.304998	24.9195
A62	1	0.671965	20.1193	29.941	38.2753	28.6356	36.1386	41.9285	9177.38	22.6795	0.735124	2883.6	0.314208	9210	828	1103	8750000000	4.16792	141	3.53893	1363	85.9596	968.385	971	464	899	59.2709	974.551	-0.12208	8750000000	0.066332	11979.1	449.922	15055.1	-101.044	65.5838	5.99848	0.831648	1.77068	2.44419	2.76659	0.494206	0.431795	0.995728	0.956017	-0.23983	0.918735	0.412936	20.8571
A63	0	0.71715	17.1252	23.8795	27.6586	26.0768	26.5707	28.6182	6191.21	22.5606	0.77139	2113.78	0.341417	6219	216	1021	2290000000	5.25296	279	6.3381	2351	252.754	497.467	376	13	2338	141.881	606.646	1.82351	2290000000	0.039324	120547	446.106	1707952	20531.2	478.901	91.1851	0.674612	5.82268	3.98608	56.5427	0.320463	0.240042	0.990724	0.946755	-0.16863	0.896268	0.242207	18.683
A64	1	0.785037	49.5846	63.1622	72.4983	70.8802	65.9697	73.4847	122756	54.7717	0.825107	14476.7	0.11793	122828	677	878	75538541896	3.68809	110	3.09674	1302	62.9434	780.315	783	375	927	45.2631	784.216	0.0164855	75538541896	0.0893292	6102.41	286.568	3849.05	-3.88514	36.4745	2.17745	0.887236	1.04224	1.85343	1.05454	0.613279	0.58005	0.998505	0.973974	-0.325718	0.947813	0.481013	16.6731
A65	1	0.63636	102.49	161.057	173.925	174.897	145.911	176.054	1559925	131.128	0.839164	77512.7	0.04969	1560087	372	634	4.15E+11	4.134	127	4.45325	1392	82.1481	504.196	502	82	1310	53.6681	515.758	0.333161	4.15E+11	0.070801	11792.5	326.092	19777.5	127.346	69.379	3.19018	0.911835	1.28678	2.06493	1.46921	0.564659	0.518974	0.998873	0.976786	-0.33124	0.96143	0.458998	17.5939
A66	1	0.543459	45.9565	84.5629	85.8429	97.2471	76.844	103.73	135890	60.1074	0.582283	21952	0.161543	136044	608	889	77149306503	4.18898	144	4.06238	1473	88.6102	744.355	735	314	1159	60.4126	753.054	0.692843	77149306503	0.0654031	13026.8	344.674	22096.7	416.341	73.4359	5.07909	0.870132	1.62805	2.35648	2.3335	0.515723	0.458449	0.997727	0.967466	-0.264726	0.934425	0.424997	18.0993
A67	1	0.651864	15.2292	23.3626	23.7697	28.6356	26.6833	28.7054	5161.75	21.0202	0.796926	1812.44	0.351129	5188	446	1388.3	4600000000	5.7586	566.25	2.45929	2044	302.8	870.268	811.5	117	1927	228.974	942.024	0.518365	4600000000	0.020704	130044	1009.91	1112971	9925.46	655.88	68.9706	0.807922	6.19944	4.08413	29.6114	0.254977	0.165039	0.989199	0.930024	-0.18667	0.931859	0.169707	29.3771
A68	1	0.631312	20.8174	32.9748	35.5106	36.0555	35.2278	38.2753	13124.2	29.1692	0.725783	3707.31	0.282479	13162	410	577	3240000000	3.45898	83	3.7062	833	52.0506	491.194	488	266	567	35.0012	495.77	0.417221	3240000000	0.10979	4516.5	103.581	2014.3	31.1554	23.4875	2.03476	0.839138	1.02089	1.83765	0.963407	0.617292	0.584215	0.996519	0.960655	-0.28677	0.916486	0.476451	9.91032
A69	1	0.614292	39.6776	64.5908	84.4038	77.4661	58.2151	84.5518	73857.3	44.7531	0.723104	11772.8	0.159399	73928	970	1809	1.50E+11	5.7622	454	2.91152	2796	264.196	1385.62	1384	230	2566	186.854	1424.15	0.060134	1.50E+11	0.021299	108262	2317.98	1156118	135.203	634.871	55.1958	0.840097	5.57083	3.93176	23.168	0.268819	0.177506	0.994918	0.95051	-0.17275	0.919916	0.184422	46.6161
A70	0	0.719133	64.1315	89.1789	96.5401	100.499	98.1529	102.01	325599	79.0373	0.835482	27394.9	0.084137	325696	735	1131	2.97E+11	4.72779	205	5.4786	2454	126.574	939.6	937	146	2308	85.3619	954.28	0.686829	2.97E+11	0.045823	27801.3	1115.6	99000.4	798.379	145.196	17.4707	0.784413	3.05652	3.12878	7.84906	0.3783	0.292808	0.998047	0.969297	-0.16716	0.874533	0.296768	32.9192
A71	1	0.767321	42.6088	55.5293	63.561	64.0312	54.0833	66.7608	76982.8	46.5851	0.779754	11223.3	0.14579	77046	1027	1467	1.18E+11	4.80963	210	3.83427	2235	135.481	1226.12	1203	643	1592	89.8263	1238.68	0.584771	1.18E+11	0.044208	30958.5	614.131	100440	1008.17	161.394	13.42	0.845237	2.65138	2.96624	6.15352	0.414446	0.336442	0.996875	0.962072	-0.21445	0.921241	0.333703	24.0234
A72	1	0.877739	20.3024	23.1304	28.1603	27.8926	25.5539	29.2916	7039.58	21.0327	0.831318	2136.72	0.30353	7069	1201	1558	13600000000	4.57146	175	5.6077	2366	114.483	1377.11	1364	928	1438	74.4779	1385.6	0.956548	13600000000	0.051912	23433	334.587	32082.5	431.006	80.7421	39.1711	0.342913	4.70616	3.7016	16.5813	0.294135	0.201612	0.988936	0.928599	-0.05241	0.57444	0.208968	18.0053
A73	1	0.573989	8.84097	15.4027	17.2047	17.8885	16.1555	18.3303	1216.83	13.4903	0.764819	720.686	0.592264	1234	614.6	951	748000000	4.33174	156	4.00293	1327	99.8223	767.579	755	494	833	65.9591	778.59	0.777114	748000000	0.060066	17025.2	147.893	23143.4	470.491	76.1476	15.0386	0.667813	2.74507	2.99864	7.24817	0.414519	0.337219	0.988468	0.93164	-0.18812	0.880665	0.329041	11.5151
A74	1	0.79379	33.1791	41.7983	46.6155	44.5533	48.8365	50.01	35207	36.932	0.729214	7123.85	0.202342	35246	617	908	20600000000	4.22255	151	3.39224	1282	91.6835	755.735	746	459	823	63.5639	764.588	0.557454	20600000000	0.063016	13458.7	176.012	20320.3	352.855	78.7179	3.38598	0.917247	1.30668	2.10919	1.62402	0.565396	0.520663	0.997117	0.964216	-0.3431	0.967958	0.459967	12.537
A75	1	0.721779	34.6134	47.9556	51.8878	49.8751	55.4853	57.5605	46932.6	39.6017	0.741818	8482.1	0.180729	47001.9	536	1008	20200000000	4.40639	147	6.47415	1777	146.874	694.271	620	371	1406	78.9535	723.595	1.89766	24600000000	0.073759	41577.1	224.445	285113	5561.86	191.638	16.2809	0.835955	2.5313	2.90636	9.40997	0.477762	0.419033	0.995316	0.960524	-0.22058	0.895257	0.371919	13.4354
A76	0	0.865968	22.8265	26.3595	29.1958	30.7435	29.0642	31.9972	9870.66	23.3972	0.817235	2722.92	0.27586	9908.45	661	1145	6020000000	4.65117	228	3.79047	1645	152.158	838.928	776	73	1572	101.176	860.954	1.0701	7340000000	0.054037	37441.7	993.633	117912	2521.64	162.244	26.957	0.703183	3.64614	3.34813	12.5012	0.383103	0.306684	0.993599	0.94874	-0.1648	0.835764	0.284698	30.9792
A77	0	0.733902	51.2894	69.8859	82.2239	80.277	68.8392	82.811	141041	56.0436	0.718446	18238.4	0.129313	141122	434	970	93500000000	5.04462	280	3.73561	1787	170.499	667.038	623	0	1787	117.556	700.995	0.8401	69300000000	0.037011	46454.5	779.543	258969	3578.02	262.642	14.4695	0.894994	2.77121	3.02001	6.57413	0.401469	0.320466	0.997249	0.964041	-0.24148	0.948639	0.322144	26.7859
A78	0	0.459516	12.1103	26.3544	27.7316	28.5052	16.7716	28.5831	2989.18	14.1449	0.746549	1344.19	0.449685	3006.14	753	1134	3590000000	4.50172	215	2.28152	1296	118.682	929.697	914	578	718	88.6457	940.526	0.182269	2660000000	0.048584	20251.5	258.536	34664.2	83.1297	124.839	9.58941	0.857648	2.38612	2.76926	3.70459	0.42002	0.339666	0.989014	0.927427	-0.23076	0.928752	0.337656	15.1561
A79	1	0.848686	15.2236	17.9378	21.7681	21.4717	19.0247	21.9913	3222.2	16.879	0.82311	1281.72	0.397779	3247.07	564	974	1480000000	4.47061	225	3.14797	1300	133.444	728.119	680	460	840	96.9699	746.114	0.926038	1810000000	0.0571	26528.5	134.355	50879.4	1394.29	116.917	21.9073	0.673805	3.40465	3.22265	9.15042	0.387156	0.310518	0.983241	0.917221	-0.17345	0.837135	0.288305	10.5109
A80	0	0.821536	49.0309	59.682	62.9052	61.7986	69.2425	70.366	103630	50.2859	0.813269	13119.2	0.126596	103820	80	124	256000000	1.70346	24	4.61347	189	14.6062	100.374	99	1	188	9.8519	102.196	0.228473	1080000000	0.372572	369.136	20.8522	15.2185	1.09321	1.87862	0.372152	0.664434	0.330774	0.981011	0.256013	0.841327	0.838749	0.994336	0.963703	-0.29043	0.754694	0.296282	4.52499
A81	1	0.669218	27.9148	41.7126	45.0511	48.4833	38.5934	48.9905	26214	31.7252	0.809539	5271.52	0.201095	26255.2	596	1047	18800000000	4.64038	145	10.6268	2322	150.34	775.754	715	258	2064	69.8239	810.446	2.45805	17200000000	0.061067	55028.9	479.804	751923	9850.68	237.814	28.0874	0.780784	3.28676	3.23411	16.9205	0.408762	0.335334	0.996078	0.963894	-0.16943	0.86839	0.33141	20.6712
A82	0	0.529466	63.2315	119.425	111.647	148.192	141.23	148.408	426998	86.6158	0.457295	59966	0.140436	427086	479	844	1.92E+11	4.48751	214	2.86446	1350	117.211	654.55	645	121	1229	86.9894	669.834	0.465913	1.92E+11	0.0498819	20241.2	537.028	41755.8	596.364	122.581	2.32478	0.962709	1.05685	1.88781	1.16597	0.615495	0.581901	0.999111	0.98012	-0.440534	0.988818	0.470125	22.5157
A83	1	0.762299	8.70495	11.4193	12.2066	13.0384	12.8062	14.5945	647.75	10.1146	0.791527	457.394	0.706127	660	1406.9	1841.1	1731053077	4.75381	253.25	2.78671	1992	139.79	1610.47	1602.5	995	997	102.095	1619.51	-0.14743	1731053077	0.0419284	29190.2	785.946	57018.3	-343.379	143.305	25.0006	0.699286	3.91073	3.33278	9.03921	0.318856	0.225773	0.985812	0.917043	-0.23508	0.938825	0.234202	27.4985
A84	1	0.738951	26.6443	36.057	41.1825	44.6542	41.7612	44.9333	21444.9	32.8833	0.583941	6392.42	0.298085	21510	507	1088.1	12417112744	4.71082	155	8.27605	2329	187.22	706.838	616	132	2197	85.4539	759.784	2.26929	12417112744	0.0614226	77651.5	639.461	1.61828e+06	20930.6	416.978	25.0381	0.886025	2.94416	3.08952	16.1339	0.436686	0.368307	0.996973	0.96962	-0.230046	0.930101	0.355747	23.2691
A85	1	0.291611	17.1764	58.9017	91.214	51	139.703	199.85	13972.3	28.1713	0.457253	6135.35	0.439109	14046	456	1213.5	11535138880	5.6182	391	7.2617	3278	244.047	844.502	823	35	3243	162.687	906.223	1.27772	11535138880	0.0244851	108056	1128.63	1.47811e+06	10426.1	509.344	53.3034	0.80921	4.80058	3.73661	29.4164	0.310878	0.221648	0.99702	0.966043	-0.204838	0.939782	0.228074	31.848
A86	0	0.291611	17.1764	58.9017	91.214	51	139.703	199.85	13972.3	28.1713	0.457253	6135.35	0.439109	14046	456	1213.5	11535138880	5.6182	391	7.2617	3278	244.047	844.502	823	35	3243	162.687	906.223	1.27772	11535138880	0.0244851	108056	1128.63	1.47811e+06	10426.1	509.344	53.3034	0.80921	4.80058	3.73661	29.4164	0.310878	0.221648	0.99702	0.966043	-0.204838	0.939782	0.228074	31.848
A87	1	0.824802	18.1558	22.0123	26.6271	25.807	25.0599	27.2947	5063.21	19.4282	0.733816	1943.18	0.383785	5092	599	934	3027070602	4.41897	159	5.48858	1446	104.907	758.042	744	405	1041	67.6406	771.023	1.09748	3027070602	0.0576136	19848.6	223.657	55044.3	993.063	96.334	10.0794	0.807699	2.35465	2.7785	4.34019	0.428607	0.351868	0.994432	0.948952	-0.203837	0.896649	0.356047	14.2148
A88	1	0.46365	10.0105	21.5907	29.9666	21.6333	25.0799	30.2324	1944.33	18.1169	0.560486	1344.1	0.691293	1973	463	837.8	857457843	4.46859	210	2.26252	1016	117.607	644.178	631	326	690	88.4151	659.239	0.226688	857457843	0.0493307	19630.8	163.744	21586.9	337.675	92.7176	16.448	0.696037	3.15927	3.0915	6.01631	0.361373	0.271686	0.980329	0.904198	-0.15844	0.843514	0.273972	12.0232
A89	1	0.46365	10.0105	21.5907	29.9666	21.6333	25.0799	30.2324	1944.33	18.1169	0.560486	1344.1	0.691293	1973	463	837.8	857457843	4.46859	210	2.26252	1016	117.607	644.178	631	326	690	88.4151	659.239	0.226688	857457843	0.0493307	19630.8	163.744	21586.9	337.675	92.7176	16.448	0.696037	3.15927	3.0915	6.01631	0.361373	0.271686	0.980329	0.904198	-0.15844	0.843514	0.273972	12.0232
A90	1	0.536429	22.097	41.1929	45.8912	32.45	47.0106	51.7494	15570.7	25.2949	0.635277	4746.71	0.304849	15628	566.7	1110	11509075413	5.14835	287	5.69573	2261	176.308	826.501	797	266	1995	118.961	858.16	1.08695	11509075413	0.0339289	53336	581.037	492142	5471.04	280.226	36.0439	0.771223	4.50049	3.63864	15.2594	0.30208	0.209613	0.994653	0.949263	-0.148945	0.870802	0.216117	22.8018
A91	1	0.552834	60.3902	109.238	95.4411	104.389	112.699	125.244	288188	66.5185	0.540446	39040.5	0.135469	288340	807	1435	3.64E+11	5.27783	330	2.7839	2119	193.235	1097.75	1069	254	1865	137.242	1123.62	0.328434	3.64E+11	0.0298772	57472	1255.92	330908	1967.88	346.009	10.4756	0.941114	2.34653	2.80668	4.77166	0.437849	0.363659	0.998156	0.97043	-0.315838	0.979038	0.356601	34.235
A92	1	0.594743	30.691	51.6038	50.5371	59.5483	51.9711	62.8411	38744.7	37.047	0.692887	7991.53	0.206261	38802	74	124	376497494	1.71898	28	2.67852	173	15.6675	96.6385	94	47	126	11.6278	98.504	0.435326	376497494	0.354182	364.049	12.0638	16.2877	1.41245	2.39199	0.184242	0.856849	0.183527	0.683413	0.149185	0.908355	0.908308	0.995023	0.973795	-0.528367	0.911319	0.182906	3.39291
A93	1	0.779213	20.565	26.392	31.0161	30.3645	28.3019	32.3883	8798.25	23.0315	0.726591	2836.56	0.3224	8836	546	768.5	3883626068	3.86576	118	3.11151	973	69.9289	657.07	658	335	638	48.5683	662.965	0.000134829	3883626068	0.080791	7782.19	196.94	4472.94	8.49536	37.8471	11.036	0.548336	2.58578	2.8562	4.13432	0.399103	0.314612	0.984485	0.914092	-0.0863233	0.65221	0.320132	13.7927
A94	1	0.670844	15.7595	23.492	28.4253	26.9072	26.2488	29.6311	5462.12	21.3183	0.743579	2017.12	0.369292	5492	316.84	409.34	7.20164e+08	2.62003	47.392	4.17494	544.929	29.2537	360.146	356.559	225.314	319.615	19.8783	362.118	0.542612	7.20164e+08	0.196184	1424.25	35.7767	226.251	10.498	7.56631	1.21296	0.722417	0.768037	1.51996	0.590718	0.677619	0.658937	0.993033	0.947157	-0.233717	0.808776	0.486223	5.84705
A95	1	0.887795	10.4587	11.7806	14.3178	13.8924	13	15.1658	955.833	11.678	0.798737	587.492	0.614638	970	606.9	1037.1	686685620	4.72054	268.5	2.28235	1279	142.033	824.377	826	410	869	108.265	841.382	0.135123	686685620	0.0415602	28325.4	326.984	54107.5	229.421	156.996	10.8958	0.867775	2.59293	2.74802	3.69551	0.393379	0.30579	0.991822	0.935295	-0.304221	0.963667	0.309623	17.0414
A96	1	0.363569	16.5113	45.4144	44.1022	38.3275	46.6154	48.6724	12200.8	26.9577	0.59278	4323.64	0.354373	12251	362	603	2920342046	3.97811	124	3.47634	926	75.349	478.691	474	129	797	51.7702	488.237	0.314711	2920342046	0.0756405	9230.85	221.03	7435.99	98.6847	46.1702	10.8149	0.619841	2.52863	2.84496	4.21607	0.406586	0.323943	0.990406	0.93189	-0.106862	0.71986	0.328329	14.5667
A97	0	0.466098	18.5725	39.8468	37.3363	42.2019	29.6142	48.3115	11146.2	23.334	0.610234	3954.32	0.354769	11193	288.2	1111	6582667822	5.58736	410	3.10181	1987	244.1	701.303	705	41	1946	170.589	766.881	0.439089	6582667822	0.0242985	96279.2	899.23	923116	4795.39	557.052	64.8656	0.791383	5.37701	3.90556	34.6671	0.305952	0.220619	0.990304	0.940398	-0.193647	0.931886	0.225654	27.8599
A98	1	0.633417	14.5368	22.9498	24.6982	25.1794	26.2488	26.8701	4289.29	19.1547	0.749253	1703.91	0.397247	4314	979	1282.7	5529280586	4.34011	154	4.14053	1619	95.7598	1125.09	1119	590	1029	63.1951	1132.12	0.263113	5529280586	0.0611616	15889.3	522.57	23052.1	208.81	76.1161	10.6447	0.751431	2.47101	2.83566	4.33846	0.416802	0.336545	0.994102	0.946486	-0.172893	0.859943	0.333913	22.4989
A99	1	0.482628	31.5453	65.3615	77.3692	52.4976	85.4283	86.3771	53374.7	46.1521	0.543009	12625.1	0.236537	53463	372.627	516.514	10792173056	3.23522	77.0745	3.42022	754.452	45.1126	445.672	444.687	246.688	507.764	31.5689	449.291	0.174346	10792173056	0.124332	3238.56	90.1274	1029.6	6.50303	18.2108	1.22384	0.873458	0.734673	1.553	0.668549	0.695933	0.678423	0.997507	0.968904	-0.355125	0.941588	0.457163	9.26717
A100	1	0.878466	26.7357	30.4345	36.2353	44.7214	33.6155	45	15004.5	28.1736	0.715323	4112.73	0.274099	15048	558	1051	9216997823	4.74786	184	4.90023	1611	147.215	756.462	707	286	1325	86.6357	782.628	1.34859	9216997823	0.0515764	40271.1	423.406	245182	4460.91	211.445	8.06704	0.925261	1.98899	2.62138	3.99717	0.481489	0.417217	0.99728	0.965659	-0.310776	0.966627	0.391872	19.3014
A101	1	0.496813	41.1701	82.8685	97.5141	101.533	108.301	145.739	139538	65.7515	0.608516	21380	0.15322	139670	160.51	349.745	9451005581	3.51017	116.203	2.56694	547.017	60.8858	249.548	246.563	31.6874	515.33	46.0311	260.128	0.384904	9451005581	0.100108	5392.25	95.8914	2344.58	61.8378	30.8795	1.07675	0.932255	0.662655	1.49495	0.619554	0.724188	0.708371	0.99759	0.970667	-0.44285	0.97323	0.415886	9.40427
A102	1	0.456335	46.06	100.935	222.895	75.1332	224.076	227.15	98873.2	61.8415	0.57051	18124.8	0.183314	98992	353	839	39299926121	4.99716	225	10.2724	2251	167.513	579.886	530	-10	2261	95.9509	630.08	2.16064	39299926121	0.0417531	60733.2	653.866	1.09846e+06	12044.8	306.739	17.4707	0.890768	2.81155	3.05213	9.36562	0.412151	0.334851	0.997982	0.971291	-0.233923	0.941838	0.333185	24.1146
A103	1	0.352812	47.84	135.597	96.566	90.1998	195.064	224.698	136803	58.4974	0.544076	23598.7	0.172501	137007	559	873	70554102408	4.41368	155	6.13186	1622	103.342	703.655	684	93	1529	65.4944	717.612	1.02567	70554102408	0.060566	19836.9	676.233	70860.7	1189.75	107.085	4.79654	0.913321	1.54411	2.30948	2.32034	0.533238	0.480188	0.998761	0.976259	-0.313374	0.960489	0.430902	25.508
A104	1	0.658407	15.5925	23.6822	27.7308	28.6531	26.6271	33.541	4975.54	20.4064	0.690552	2041.02	0.410212	5022	281.445	559.417	828485485	3.88127	161.807	2.90948	747.866	91.4425	391.054	353.661	185.416	562.45	67.402	406.166	0.885377	828485485	0.0868603	12048.1	81.1368	10564.1	438.66	53.8258	6.91227	0.76684	1.83023	2.5499	3.48582	0.51428	0.456084	0.987674	0.931159	-0.1958	0.855513	0.383221	8.32864
A105	1	0.776182	16.1782	20.8433	37.9473	37.6431	22.0227	40.8167	2103	16.7073	0.595375	1333.27	0.633987	2151	466	861	968597503	4.55014	227	2.33791	1079	124.032	654.4	638	291	788	93.1551	671.045	0.30972	968597503	0.0469147	22061.3	247.925	31166.7	446.758	112.399	8.0975	0.862409	2.21883	2.63039	2.9676	0.429571	0.349776	0.992737	0.939293	-0.269525	0.945664	0.349371	14.8918
A106	1	0.747644	61.1782	81.828	185.432	200.092	92.1303	200.132	243470	69.4014	0.765426	24634.5	0.101181	243570	781.64	1529.53	3.68E+11	5.49292	394.76	2.67794	2223.92	228.602	1196.18	1234.74	203.235	2020.69	163.031	1229.07	-0.3943	3.68E+11	0.0256304	79751.1	1724.12	637747	-4230.32	490.284	19.5915	0.923154	3.25796	3.22693	8.59327	0.371763	0.287394	0.997054	0.962489	-0.262434	0.967275	0.289494	40.0804
A107	1	0.794438	55.2844	69.5893	77.7946	75.4321	80	86.0407	158419	59.3195	0.767324	18452	0.116476	158498	518	740	65063986734	3.85752	116	3.46571	993	69.663	634.597	641	126	867	48.4108	640.705	-0.223678	65063986734	0.0821165	7789.7	448.981	6909.61	-56.6162	45.9047	2.31937	0.903582	1.10381	1.88747	1.04116	0.598023	0.560054	0.998122	0.970218	-0.339082	0.955327	0.470968	20.9305
A108	0	0.680824	57.0514	83.7975	103.576	106.231	102.956	136.092	181414	72.0581	0.562109	27570.4	0.151976	181657	447	1074.4	1.04E+11	5.15701	247	5.97057	2286	190.103	706.22	651	79	2207	109.955	755.166	1.57527	1.04E+11	0.0369841	71528.6	695.162	754009	9896.16	340.993	36.7877	0.8032	3.69771	3.38778	22.7197	0.39394	0.319355	0.995557	0.962387	-0.202425	0.923455	0.314676	24.8813
A109	1	0.403305	26.3904	65.4353	60.2163	89.6939	61.6117	94.784	34822.2	49.3388	0.383887	13433.4	0.38577	34998	444	861	14878800700	4.67714	220.75	3.4029	1399	131.947	630.832	603	212	1187	92.4892	652.022	0.753926	14878800700	0.0460499	27184	336.087	69070.5	1261.88	145.668	13.2794	0.832075	2.72077	2.97725	5.69311	0.398255	0.315252	0.994388	0.948375	-0.194631	0.903923	0.317937	17.4064
A110	0	0.664414	47.2159	71.064	75.3923	77.7946	84.9588	92.4554	134488	62.7451	0.664229	19111.2	0.142104	134571	424	761	48469623314	4.44194	167	4.82012	1567	106.409	583.549	568	169	1398	70.3073	600.149	0.963257	48469623314	0.0561163	19649.6	332.194	49866.6	928.907	104.008	10.3061	0.818939	2.2553	2.77202	5.06382	0.453034	0.382843	0.996891	0.963269	-0.207324	0.9038	0.370254	17.5717
A111	0	0.447394	18.3659	41.0509	31.4006	44.6878	44.643	49.8397	7067.71	22.4062	0.602148	2957.79	0.418493	7121	652	1138	5779911940	5.03331	220	4.58535	1827	154.66	875.564	860	112	1715	94.4708	900.928	0.312987	5779911940	0.0400982	45058.4	1000.45	218296	298.08	206.839	34.4277	0.711634	4.22166	3.5829	16.1074	0.328037	0.2401	0.993223	0.945725	-0.150077	0.863225	0.244298	30.9407
A112	0	0.682151	32.7481	48.0071	54.1202	46.5296	54.6717	57.4891	41275.5	37.3199	0.726434	7950.9	0.19263	41350	958	1308.1	53844988916	4.5761	164	6.95495	2161	116.168	1129.22	1109	514	1647	69.8754	1141.13	1.41491	53844988916	0.0546028	27049.2	677.36	113270	1948.8	132.533	16.1589	0.780973	2.58834	2.93991	9.32467	0.436012	0.363812	0.996544	0.964468	-0.197934	0.903831	0.358364	25.461
A113	1	0.326913	38.5191	117.827	136.894	132.816	96.0417	144.174	65053.1	63.9906	0.267456	29246.7	0.449583	65156	553	1082	46572592193	5.07865	285	2.9291	1622	166.478	819.461	821	191	1431	117.474	845.45	0.259227	46572592193	0.0342955	43269.3	727.466	165308	1058.12	238.5	15.9981	0.873818	2.883	3.07106	7.41479	0.396809	0.315519	0.995375	0.954469	-0.230446	0.94183	0.314692	25.9197
A114	0	0.381638	49.7867	130.455	153.323	144.087	109.836	160.265	233675	66.3053	0.253899	72260	0.309234	233900	682	1172	2.00E+11	4.95434	245	6.24308	3760	153.478	902.224	872	102	3658	103.208	923.857	0.936979	2.00E+11	0.0394475	39504	1087.85	202423	2459.44	211.986	21.6313	0.814153	3.15369	3.21036	11.3774	0.394495	0.315626	0.999008	0.979477	-0.193643	0.911368	0.313106	32.2531
A115	1	0.80305	51.9149	64.6472	101.833	86.8332	82.3468	103.745	118214	53.7775	0.412662	28227.2	0.238781	118540	522.872	710.781	45127858021	3.61724	97.2366	3.78742	887.02	58.6838	612.421	610.501	186.637	700.383	40.4076	617.007	-0.227785	45127858021	0.096837	5637.47	332.177	3078.5	9.05103	30.8345	3.34046	0.803683	1.2626	2.08991	1.70834	0.57867	0.536978	0.996124	0.959973	-0.244806	0.901003	0.459474	18.0362
A116	0	0.194998	34.2025	175.399	62.434	33.541	149.265	151.45	932.25	64.9402	0.475235	971.101	1.04167	975	895.8	1672	1602037072	5.5119	415	2.88438	2238	240.112	1246.86	1202	624	1614	169.606	1281.84	0.542612	1602037072	0.0253991	88461.5	717.991	540006	5443.06	429.756	67.506	0.726032	6.36038	4.03374	25.8182	0.240416	0.14995	0.985304	0.91647	-0.281607	0.975461	0.161922	25.0466
A117	0	0.763782	79.7637	104.433	125.419	140.759	119.105	147.221	561830	103.24	0.603854	54528.3	0.0970548	562026	253.163	491.933	82838165508	4.02574	120.52	4.5699	1199.97	76.6452	370.373	365.357	10.5877	1189.38	50.3668	383.917	0.500861	82838165508	0.0760303	10215.8	248.148	16303	237.45	59.8736	3.48926	0.889608	1.28264	2.09186	1.7825	0.573946	0.531197	0.998504	0.974671	-0.311357	0.951729	0.460126	15.2988
A119	1	0.850414	27.791	32.6794	37.4833	38.4187	38.833	40.05	19152.4	30.1619	0.745069	4646.25	0.242594	19198	477.068	673.883	5986010262	3.42345	88.7214	4.61056	963.438	61.5394	552.653	527.498	384.356	579.081	39.5725	558.394	1.32763	5986010262	0.124185	6379.02	59.9846	5437.59	263.755	31.5294	3.15785	0.815738	1.20798	2.06501	1.65951	0.595158	0.556609	0.994689	0.954424	-0.234602	0.874524	0.452655	7.27218
A120	1	0.200746	15.5057	77.2404	30.8869	86.6833	28.4605	97.5756	7003.33	25.4836	0.661878	2674.5	0.381889	7044	413	1169	4120727634	5.28762	379.25	3.88732	1970	241.475	702.118	594.5	121	1849	163.496	764.852	1.20558	4120727634	0.0336977	92028.4	638.204	893617	12967.2	447.323	38.2922	0.839579	4.55153	3.6791	17.1087	0.311058	0.222051	0.993399	0.945215	-0.185632	0.914939	0.227702	23.1472
A121	1	0.753727	53.1506	70.517	70.9366	87.0919	73.5527	87.5329	153983	57.9642	0.741344	18740.4	0.121705	154061	708	1084	1.23E+11	4.58909	188	3.96453	1710	117.714	880.858	861	335	1375	79.2264	893.846	0.725767	1.23E+11	0.050435	23051	538.41	64574.6	1080.17	128.13	13.6935	0.806611	2.79251	2.99011	5.63256	0.390572	0.305994	0.995717	0.954036	-0.174978	0.877234	0.310225	22.5787
A122	1	0.718754	37.4629	52.122	64.0078	59.808	60.5392	67.7495	66380.9	49.8181	0.624879	12687.7	0.191135	66467	313	448	9899099625	3.23486	71	5.86954	944	44.3982	381.317	379	115	829	29.3224	385.918	0.726324	9899099625	0.131502	3530.21	141.021	1845.42	47.6174	18.662	1.55718	0.844762	0.854684	1.66963	0.802009	0.660043	0.636791	0.998664	0.976117	-0.304255	0.915701	0.478094	11.6938
A123	0	0.275188	35.8109	130.132	126.905	58.1378	114.756	134.093	59464.9	48.7386	0.375834	19603.3	0.329661	59626	507	1732	1.01E+11	6.07215	581.75	2.62069	2768	358.08	1222.92	1313	22	2746	252.347	1301.37	-0.472204	1.01E+11	0.0176259	198024	2662.32	3.76695e+06	-20381.5	1208.12	67.1758	0.894658	5.9158	4.04175	30.9241	0.275116	0.187706	0.994689	0.951479	-0.204242	0.950949	0.192376	48.7548
A125	1	0.691213	69.1456	100.035	100.24	114.586	121.38	123.507	402849	84.7598	0.568409	46407.1	0.115197	403006	601	886	2.25E+11	4.26402	147	4.69971	1531	92.3001	736.644	725	305	1226	61.5402	746.525	0.709297	2.25E+11	0.0641577	14655.2	336.458	32215.1	475.256	84.1764	3.57575	0.918111	1.3404	2.14193	1.72132	0.560523	0.51428	0.998581	0.974522	-0.333031	0.965662	0.454267	17.7849
A126	1	0.506616	16.3026	32.1795	44.5533	23.6008	44.1022	44.8999	3518.92	20.3953	0.500508	2235.35	0.635239	3562	334.575	502.34	6.17183e+08	3.43159	91.789	3.57446	697.366	54.1296	410.665	399	172.077	525.289	37.7579	416.255	0.621722	6.17183e+08	0.111581	4622.6	116.14	1634.26	68.5319	21.503	2.59907	0.780284	1.15212	1.9532	1.22926	0.589996	0.551338	0.99477	0.952348	-0.234753	0.869989	0.475649	10.554
A127	0	0.183115	20.8022	113.602	31.0161	48.0208	45.607	99.373	16589.8	23.6069	0.494682	6358.94	0.383305	16682	482	844	6876614762	4.36324	171	4.25302	1301	116.177	624.092	577	140	1161	74.2774	642.042	1.16967	6876614762	0.0667022	22726.4	422.492	56357.2	1490.99	108.541	8.06747	0.858338	1.91708	2.5974	4.27271	0.502621	0.444798	0.996575	0.963165	-0.243271	0.921852	0.403776	19.9336
A128	1	0.764762	29.2269	38.217	41.6293	45	39.3954	46.5725	23213.3	29.7526	0.696317	5651.56	0.243462	23260	498	757	8793853058	3.90473	99	6.63759	1211	80.0596	604.186	578	340	871	44.5833	614.872	1.7002	8793853058	0.0918549	13026.6	139.549	27300.6	805.526	60.0303	4.74048	0.850007	1.42634	2.26719	2.65623	0.570604	0.526878	0.996437	0.963595	-0.266827	0.922357	0.433507	11.212
A129	0	0.425573	52.7329	123.91	161.645	107.517	216.148	226.976	256737	73.405	0.378069	51670	0.201257	256908	453	823	1.06E+11	4.57163	194	3.31193	1311	116.216	626.235	611	40	1271	80.3744	643.25	0.478487	1.06E+11	0.0499085	21600.9	625.406	49412.4	670.415	122.853	7.83764	0.879783	2.0612	2.622	3.43974	0.459261	0.388364	0.997145	0.962991	-0.251279	0.939406	0.378644	24.4264
A130	1	0.761107	58.2619	76.5489	91.2688	85.9884	97.7446	100.05	213856	69.0449	0.62815	27531.8	0.12874	213988	601	925	1.30E+11	4.48461	164	10.4975	2152	113.017	762.24	736	77	2075	68.8906	779.439	1.96677	1.30E+11	0.0575731	26515.6	796.688	177913	2715.86	131.219	7.94987	0.883924	1.73579	2.46785	4.85109	0.534762	0.485091	0.99889	0.980363	-0.298671	0.958306	0.42802	27.6742
A132	1	0.809691	51.4521	63.5454	69.3542	76.4853	70.406	77.2852	129318	55.7532	0.666853	18545	0.143406	129408	588	896	70095174827	4.27385	128	7.60153	1784	101.698	721.024	689	229	1555	56.4056	735.976	1.76825	70095174827	0.0714778	21784.6	422.087	97416.5	2002.36	108.655	5.94188	0.894293	1.59727	2.37605	3.31489	0.542298	0.493279	0.998522	0.976016	-0.286874	0.946887	0.432855	19.9095
A133	1	0.768372	27.7861	36.1623	41	40.3609	46.8615	48.0625	19573.3	31.8307	0.609888	5758.96	0.294225	19626	1354	1930	50742308315	5.20428	289	6.23976	2545	189.362	1587.2	1545	141	2404	122.765	1607.94	-0.0931958	50742308315	0.035363	66246.8	3490.32	812877	-341.566	350.585	24.4282	0.86821	3.47741	3.32412	11.9587	0.364718	0.279914	0.997455	0.966483	-0.222665	0.940206	0.282065	58.3845
A134	1	0.669541	21.2212	31.6952	41.0488	31.1448	34.9857	41.4849	9502	23.4428	0.56251	3856.83	0.405897	9548	925	1271	11762784817	4.52463	176	3.93453	1703	109.453	1100.82	1102	387	1316	73.6309	1109.94	0.290584	11762784817	0.0529369	20150.3	917.492	50683.6	462.868	114.741	10.2512	0.835791	2.36576	2.79652	4.45868	0.430213	0.353461	0.996541	0.959355	-0.218475	0.917368	0.350545	29.8557
A135	1	0.151907	17.6783	116.376	25.807	28.6007	69.3397	84.3623	8302.21	19.7412	0.526789	3763.95	0.453367	8364	531.3	1132.7	5601222569	4.99395	216	4.4961	1698	173.567	783.276	732	305	1393	101.946	818.341	1.24641	5601222569	0.0427805	56161.3	404.326	365044	5576.85	258.227	23.1058	0.831985	3.14863	3.22027	12.917	0.420022	0.350022	0.992981	0.949958	-0.232528	0.938638	0.329522	18.5844
A136	0	0.553567	52.3883	94.6376	141.421	77.0065	133.222	146.813	185963	63.6029	0.411874	38253.4	0.205705	186152	254.684	495.757	29733679679	3.86717	111.746	4.52148	1675.7	71.3348	389.013	399.508	56.425	1619.27	48.216	399.66	-0.116859	29733679679	0.082844	8396.53	205.675	9538.24	-64.3769	49.1011	2.6883	0.896007	1.14741	1.96434	1.32792	0.594408	0.556045	0.999387	0.983199	-0.32309	0.951853	0.468462	13.9309
A137	1	0.693236	20.6976	29.8564	32.1403	39.9625	35.2278	40.7554	9841.83	26.1451	0.605982	3665.01	0.372391	9886	231	988	3607108912	5.32737	387.75	3.61962	1690	242.547	522.981	421	26	1664	167.105	604.045	1.10931	3607108912	0.0324009	91360.9	446.173	763159	10942.4	423.91	38.874	0.828336	4.29857	3.61666	19.8609	0.34607	0.26509	0.99172	0.943131	-0.197835	0.923489	0.267158	18.6992
A138	1	0.640719	11.3079	17.6487	19.2354	20.2237	20.2485	22.7376	1595.42	15.3644	0.583641	1131.33	0.70911	1620	961.8	1485.1	2466157916	5.04062	268.25	2.86249	1852	161.263	1217.05	1206.5	664	1188	112.045	1233.82	0.0562257	2466157916	0.0352522	41110.5	542.542	147005	494.846	219.56	20.4589	0.828312	3.49609	3.23994	7.67402	0.344257	0.254218	0.991721	0.936044	-0.245315	0.950106	0.261618	22.1938
A139	1	0.17344	17.4736	100.747	24.2074	23.7697	25	119.206	4306.17	19.1772	0.634083	2018.67	0.468786	4344	787	1235	4239635195	4.76143	211	3.71389	1696	138.53	971.377	935	295	1401	91.2438	987.914	0.635011	4239635195	0.0474899	32401.1	797.268	91905.4	1426.8	149.033	13.5628	0.829072	2.67338	2.96697	6.18537	0.412447	0.334201	0.995909	0.956813	-0.227529	0.925423	0.332549	27.6287
A140	1	0.698718	55.601	79.5758	96.566	86.122	98.4784	99.905	207903	69.4314	0.556602	30491.6	0.146663	208002	507	766	84137667016	4.01057	99	8.44219	1537	82.3362	624.206	603	185	1352	44.9957	636.006	1.86604	84137667016	0.0861338	14871.1	350.966	55313.6	1304.59	79.1111	3.38742	0.916912	1.20782	2.06985	1.88108	0.600265	0.562943	0.998891	0.979077	-0.337555	0.95962	0.450775	18.2216
A141	0	0.434455	30.6184	70.4755	80.2309	74.6324	79.0569	109.238	59241.8	47.493	0.485087	15150.1	0.255734	59336	563	1049	38605633053	4.85326	260	4.24938	2516	150.554	784.635	762	267	2249	108.746	806.615	0.748534	38605633053	0.0395999	34975.1	513.131	162352	2113.82	201.462	6.84401	0.933896	1.74613	2.47371	3.69244	0.51567	0.459452	0.999185	0.981577	-0.340773	0.978082	0.414741	21.5513
A142	1	0.651361	28.5243	43.7918	50.1199	48.3735	42.4382	51.1077	24214	30.4707	0.61163	6617.69	0.2733	24280	633	1044.1	17283356780	4.7493	212	3.84743	1627	130.938	826.745	809	183	1444	88.6086	843.703	0.629811	17283356780	0.0449015	28328.4	716.131	81213.7	1035.88	145.868	12.0835	0.845255	2.47205	2.88758	5.78395	0.432929	0.358914	0.996597	0.961201	-0.224667	0.927312	0.351329	26.1278
A143	1	0.688378	28.3548	41.1907	48.1041	45.6946	46.9574	49.051	32027.4	39.1046	0.795977	6127.24	0.191312	32081	532	1504	30252352752	5.6021	431	4.36936	2697	305.761	887.301	746	166	2531	194.922	971.081	1.37628	30252352752	0.0284824	155696	1027.04	3.34754e+06	36213.8	835.717	52.4599	0.88103	5.12203	3.84986	25.4951	0.297174	0.2083	0.995103	0.954182	-0.185488	0.924855	0.214545	28.8301
A144	0	0.620598	39.1094	63.0188	59.6657	67.082	75.4321	77.479	85578.8	49.5462	0.777882	12073	0.141074	85643	574	869	46729838130	4.37772	147	10.8988	1804	101.213	723.713	708	179	1625	61.6391	738.671	1.88593	46729838130	0.0622991	21874.6	535.974	199777	3065.01	132.693	10.6342	0.851828	2.25349	2.74908	5.39721	0.448404	0.376135	0.99762	0.968034	-0.210805	0.907935	0.368579	22.4824
A145	0	0.284586	16.7827	58.9722	56.3028	39.4588	62.3699	63.5374	8806.12	24.6937	0.496647	4152.34	0.471529	8891	160	672	1675514708	4.86962	252	3.53872	1139	155.504	385.931	359	22	1117	106.244	434.109	0.893562	1675514708	0.0400597	39507.8	263.805	147152	2641.09	198.973	20.6292	0.809506	3.26016	3.22016	9.53448	0.377641	0.295225	0.990706	0.937313	-0.196679	0.905463	0.297517	14.8029
A146	1	0.768828	49.5973	64.5103	70.7743	74.0945	66.2118	75.2928	132640	57.3821	0.848319	14826.6	0.111781	132710	461	787	54071643323	4.45953	174	4.12585	1412	104.945	623.704	619	195	1217	71.2977	638.312	0.449515	54071643323	0.054828	18435.8	363.154	47653.4	442.684	107.498	5.27175	0.906243	1.63237	2.36372	2.51871	0.516767	0.460096	0.997918	0.96928	-0.307152	0.961999	0.427509	18.3738
A147	0	0.801774	39.3678	49.1009	54.7083	52.811	55.1543	57.8792	61472.1	44.4089	0.846127	8902.26	0.144818	61527	269	583	10491085676	4.11719	151	4.44091	1214	99.2492	392.792	354	64	1150	65.6014	412.931	1.25011	10491085676	0.0754149	16226.4	210.574	32171.3	995.856	83.7446	8.45707	0.814842	1.95803	2.59621	4.49771	0.489117	0.427415	0.996289	0.961684	-0.207824	0.888025	0.40322	13.8472
A148	1	0.725941	29.3681	40.4551	46.2277	44.7772	46.2277	47.8017	29895.1	35.8779	0.768257	6063.33	0.20282	29951	636.424	940.941	19095268631	4.35969	145.693	7.07752	1676.42	97.8124	786.9	775.687	262.113	1414.31	61.4287	798.467	1.20373	19095268631	0.0619663	18338.5	505.118	89478.1	1469.57	111.836	8.48796	0.859127	2.07328	2.64554	4.01963	0.466295	0.398021	0.997517	0.966538	-0.237446	0.925134	0.38249	21.8925
A149	1	0.575427	41.2508	71.6872	50.1597	97.5756	172.012	176.686	34786.5	49.4735	0.613208	8403.95	0.241587	34921	455	1104	23455398391	5.35313	389	2.84802	1899	213.778	777.343	777	-25	1924	158.231	819.555	0.279135	23455398391	0.0281642	67408	1125.49	404412	1679.67	384.422	24.792	0.878468	3.37141	3.30119	13.0821	0.383666	0.303711	0.995949	0.959858	-0.245706	0.957793	0.301384	32.1803
A150	0	0.61689	58.2527	94.4297	107.838	109.041	92.0489	121.614	296870	76.4719	0.734592	29296.4	0.0986846	296977	344	754	99343615610	4.7581	221	4.30845	1579	130.963	553.495	549	-5	1584	90.8982	578.374	0.483814	99343615610	0.0436439	28160	593.879	107231	927.88	159.191	12.5026	0.854021	2.67221	2.93088	5.10082	0.400206	0.317286	0.997078	0.961586	-0.21196	0.918928	0.319281	23.6052
A151	1	0.617798	31.9038	51.6411	55.3624	60.4401	51.788	61.3922	47635.1	43.1858	0.701644	9057.03	0.190133	47702	495	937	24106166098	4.70412	180	7.86257	2163	144.607	679.681	627.5	229	1934	80.5988	710.879	1.95058	24106166098	0.0525877	43383.5	368.138	346289	5728.65	200.245	26.4609	0.764067	3.43682	3.30582	14.3105	0.375548	0.292939	0.995818	0.959683	-0.146266	0.839968	0.294633	18.0187
A152	1	0.176304	21.696	123.06	32.7567	113.323	96.1769	115.771	14680.7	27.4963	0.505023	5741.21	0.391073	14734	536	903	7403253784	4.53535	168	5.70208	1551	118.577	690.357	655	110	1441	73.7301	708.845	1.178	7403253784	0.0576521	25868	583.74	101553	1783.31	126.843	8.19239	0.875842	2.01986	2.65014	3.97465	0.481728	0.417805	0.997675	0.967912	-0.263441	0.941522	0.385965	23.538
A153	1	0.799918	55.034	68.7995	81.0247	78.4347	80.2309	83.3607	177327	65.7802	0.614252	24849.7	0.140135	177436	490	684	61336562463	3.73603	89	7.48647	1342	63.8266	580.869	570	0	1342	38.1284	587.948	1.16287	61336562463	0.0999789	8274.16	565.866	13921.1	318.15	43.4442	2.87723	0.874788	1.09323	1.94598	1.62658	0.62105	0.588487	0.999025	0.980667	-0.320115	0.942256	0.458311	23.5737
A155	1	0.702694	57.3047	81.5499	96.5401	84.2021	93.6056	101.828	248598	75.8122	0.580927	32912.5	0.132393	248726	373.615	525.049	51384440764	3.416	75.0044	5.99666	892.746	49.4965	449.449	451.46	26.2894	866.457	31.4906	454.522	-0.409836	51384440764	0.119689	4585.85	311.973	3486.78	-41.303	24.4506	2.27726	0.828574	1.05865	1.86297	1.10454	0.611536	0.577411	0.998162	0.971464	-0.268445	0.899055	0.475637	17.5051
A156	1	0.651969	46.8094	71.797	72.2357	86.2844	87.2812	88.0511	141449	59.2929	0.615829	21318.5	0.150715	141544	313.988	540.154	25781375859	3.86408	110.106	4.09229	882.308	70.7021	416.679	402.64	7.80303	874.505	46.5147	426.783	0.631161	25781375859	0.0862225	8522.22	298.155	9129.3	189.793	47.2842	2.74053	0.889775	1.1609	2.00026	1.35556	0.595323	0.556779	0.997909	0.969693	-0.316144	0.948898	0.461605	16.9414
[truncated: 802 more columns]

## Sheet: clinical indicators train
name	gender1=man 0=woman	age	Glypican-3	AFP	AFP grade（grade1＜20，20＜grade2＜400，grade3＞400）	Ki67	APTT	ALB	total Bilirubin	ALT	AST	HBV	liver Cirrhosis	Differentiation	Satellite Nodule	MVI
A2	1	60	1	240.11	2	50	29.2	18.1	17.8	119	165	0	0	2	1	2
A4	1	54	0	144.5	2	10	25.4	36.7	14.2	67	66	0	0	2	0	0
A6	0	68	1	240.5	2	30	24.8	36	70.3	33	19	1	1	2	0	0
A7	1	44	0	240.5	2	33	27.8	48.5	29.5	28	24	1	0	2	0	0
A8	0	54	1	2	1	20	39.2	23.1	28.3	158	249	0	0	2	0	0
A10	1	47	1	1000	3	60	29.7	34.2	6.9	24	20	0	0	2	0	0
A11	1	54	1	92.58	2	30	26.6	34	14.7	65	63	0	0	2	0	0
A12	0	60	1	133.33	2	60	42.7	33.1	24.2	72	125	0	0	2	0	1
A14	1	56	1	8.56	1	20	39.7	39.5	55	71	67.8	0	1	2	0	1
A15	1	57	1	4.78	1	5	31.8	38.4	132	109	34.1	0	0	2	0	0
A16	1	68	1	6.4	1	30	27.5	34.2	79	115	18.6	0	0	2	0	0
A17	1	60	1	3.12	1	20	32.9	38.8	115	51	16.6	0	0	2	0	0
A20	0	69	1	7.92	1	40	32.9	30.4	85	107	28.5	0	1	2	0	0
A21	1	57	1	2000	3	60	27.3	35.4	16	27	5.2	0	1	2	0	0
A22	0	52	1	137.22	2	20	28.9	45.4	10	18	9.7	0	1	2	0	0
A23	1	61	1	5.27	1	15	26.7	41.6	34	35	33.1	0	1	2	0	0
A25	1	57	1	1000	3	50	39.4	20.7	323	1391	247.7	0	0	2	0	0
A26	1	53	1	1000	3	50	33.2	39.9	61	97	13.6	0	1	2	1	2
A27	1	69	1	1000	3	30	41	30	9	15	19.4	0	1	2	0	1
A29	1	60	1	5.7	1	20	29.5	38.1	40	44	18	0	1	2	0	1
A30	1	47	1	8.3	1	60	26.8	40.9	64	31	28.6	0	1	2	0	0
A31	0	33	1	1000	3	60	29.1	33	133	226	61.6	0	0	2	0	0
A32	1	61	1	3.09	1	60	31.6	34.2	115	139	17.2	0	1	2	0	0
A33	1	64	1	1000	3	65	33	29.3	134	38	5.9	0	1	2	0	2
A34	1	41	1	60.04	2	20	24.3	44.1	75	55	6.1	0	0	2	0	0
A35	1	40	1	213.33	2	40	27.4	44.6	52	145	12.5	0	0	2	0	0
A37	1	60	1	1000	3	50	27.9	38.8	30	26	14.9	0	1	2	1	2
A38	1	49	1	2.26	1	30	34.8	32.5	154	74	38.1	0	0	2	0	0
A39	1	76	1	182.65	2	5	25.6	37.7	155	212	36.1	0	1	2	0	0
A40	1	52	1	2.26	1	20	26.4	32	262	433	19	0	1	2	0	0
A41	1	47	0	2.92	1	10	37.5	33.3	587	328	105.4	0	0	1	0	0
A42	1	53	1	215.44	2	80	37.6	31	14	16	17.7	0	1	2	1	2
A43	1	53	1	183.65	2	60	28.7	46	32	41	13.6	0	1	2	1	1
A44	0	54	1	10.58	1	40	30.4	42.6	120	93	18	0	0	2	0	0
A45	1	45	1	12.22	1	5	36.7	22.2	45	55	15.9	0	1	2	0	0
A46	1	76	1	3.69	1	10	27.9	42	22	20	27	0	1	2	0	0
A47	1	47	1	88.09	2	50	26.5	31.9	66	57	21.2	0	1	2	1	2
A51	1	53	1	54.46	2	40	37.1	21.3	54	79	12.5	0	1	2	1	1
A53	1	58	0	15.71	1	30	41.3	35.3	157	192	22.3	0	0	2	0	0
A54	0	52	1	122.38	2	10	26.2	42.5	19	23	14.2	1	0	1	0	0
A55	1	67	1	343.47	2	30	29.8	31.4	159	317	12	1	0	2	0	0
A56	1	53	1	1000	3	60	30.3	43.2	20	33	15.9	1	1	2	0	0
A58	0	54	1	184.55	2	30	25.6	24.1	108	85	22.5	0	1	2	0	1
A59	1	68	1	25.77	2	5	43.1	37.7	49	40	17.1	0	0	2	0	0
A60	1	65	0	2.02	1	40	30.6	38.7	30	29	3.2	0	0	2	0	1
A61	1	62	1	8.68	1	10	32.2	40.9	60	68	32.2	0	0	2	0	0
A62	1	60	0	3.45	1	80	27.1	39.8	24	46	9.7	1	1	2	0	2
A64	1	48	1	342.82	2	15	29	40.1	52	177	12.1	0	0	2	0	0
A65	0	66	1	205.2	2	70	28.3	19.6	108	210	47.3	0	0	2	0	1
A67	0	61	1	5.57	1	10	35.6	40.6	30	38	19.6	0	0	1	0	0
A68	1	66	1	24.9	2	10	29.3	29.4	126	196	15	0	0	2	0	0
A69	1	59	0	3	1	10	33.5	29.4	291	402	20.1	0	1	2	0	0
A70	1	46	1	12.55	1	33	28.44	36.1	39	41	11.6	0	1	2	0	1
A71	1	57	1	239.59	2	40	30.1	41.6	26	34	17.3	0	1	2	0	0
A72	1	46	1	3.09	1	5	36.5	38.4	41	43	32.1	1	1	1	0	0
A73	1	55	1	7.28	1	40	23.6	32.4	83	24	13.5	0	0	2	0	1
A74	1	57	1	2.36	1	10	25.9	47.6	14	22	10.7	0	0	2	0	0
A75	0	65	0	3.02	1	30	27.3	40.1	48	36	12.1	0	0	2	0	0
A77	1	58	0	11.62	1	10	34.4	41.6	22	32	15.7	0	0	2	0	0
A78	1	56	1	3.29	1	60	34.8	47.1	20	21	15.6	0	0	2	0	0
A79	1	64	0	2.01	1	60	29	43.3	16	25	15.6	0	1	2	0	0
A80	1	48	1	44.23	2	80	28.2	44.7	50	33	18.8	0	0	2	0	0
A84	1	71	1	3.48	1	50	37.6	44	11	22	19	1	1	2	0	1
A85	1	56	0	2.96	1	10	29	39	29	54	26.4	0	0	2	0	0
A86	1	52	1	87.22	2	60	26.6	43.8	20	23	17.3	0	0	2	0	0
A88	1	70	1	6.83	1	40	31.9	40.5	28	32	15.1	0	1	2	0	0
A91	1	50	1	3.1	1	33	28.8	39	97	66	9.3	0	1	2	0	0
A92	1	51	1	3.01	1	60	30.3	44.1	53	52	15.2	0	1	2	0	0
A93	0	74	1	5.18	1	20	26.7	43.4	84	58	19.4	0	1	2	1	2
A94	0	66	1	3.53	1	30	28.6	40.3	40	28	16.4	0	1	2	0	0
A98	1	56	1	19.54	1	30	35.2	31.6	39.1	43	67	1	1	2	0	0
A99	1	55	1	2.06	1	20	36.2	44	16.6	50	34	1	1	2	0	0
A100	1	34	1	2000	3	85	30.4	37.2	34	29	8.1	1	1	2	0	2
A102	1	50	1	218.9	2	10	31.9	43.8	11.3	77	60	0	1	2	0	0
A103	0	46	1	1000	3	20	27.4	39.8	16	27	27	1	0	2	0	0
A104	1	30	1	1000	3	70	36.8	37	33.3	245	188	0	1	2	0	1
A106	1	66	1	3.36	1	30	29.1	43.5	33.5	14	25	0	0	2	0	1
A107	0	36	0	1	1	60	26.2	45.8	8.4	36	56	0	0	2	0	0
A109	0	67	0	1.96	1	65	35.1	36	9.1	18	31	0	0	2	0	0
A111	1	69	0	3.12	1	17.5	31.3	41.3	6.5	20	20	0	0	1	0	0
A112	0	53	1	335.56	2	60	27.2	29.4	13.8	97	93	0	1	2	1	2
A114	1	42	1	11.44	1	30	34.5	30	13.1	187	174	0	1	2	0	1
A116	1	61	0	13.74	1	40	30.8	44.3	14.9	38	44	0	0	2	0	0
A117	1	55	1	9.58	1	10	33.5	36	13.1	16	19	0	0	2	0	0
A118	1	54	1	146.56	2	40	28.4	36	31	395	242	0	0	2	0	1
A119	1	67	1	197.68	2	20	30.3	32.5	39.5	89	108	0	0	2	0	2
A120	1	66	1	963.1	3	80	33.4	39.2	19	39	13.2	0	0	2	0	2
A123	0	49	1	197.17	2	20	39.3	39.1	24	42	28.1	0	1	2	0	1
A124	1	66	0	4	1	15	32.2	36	45	53	34.8	1	1	1	0	0
A126	1	67	0	3.27	1	70	36.2	25.7	47	81	47.8	0	0	2	1	0
A127	1	61	1	1000	3	40	29.6	39.2	21	29	17.7	0	1	2	0	1
A128	1	62	1	1000	3	60	28.8	46.2	22	43	22.1	1	1	2	0	2
A131	1	42	1	5.14	1	50	30.5	39.4	31	27	14.5	1	0	2	0	0
A132	0	64	0	2.44	1	10	24.1	38.7	28	44	7.9	0	0	2	0	1
A133	1	54	1	27.51	2	30	38.8	22.6	49	106	20.5	1	1	2	0	0
A136	1	46	1	1000	3	80	34.7	33.3	361	619	31.1	1	1	2	1	2
A137	0	67	0	2.81	1	5	29.4	41.1	38	34	10.5	0	0	2	0	0
A140	1	60	0	4.97	1	1	30.3	36.1	10.4	15	19	1	0	1	0	0
A141	1	67	0	2.27	1	50	30.7	47.8	13.9	30	30	0	0	2	0	0
A142	1	70	1	3.09	1	12.5	46.9	33.1	71.9	134	107	0	1	2	1	1
A144	1	44	1	13.19	1	40	30.6	39.5	32.9	66	58	1	1	2	0	0
A145	1	60	1	11.77	1	30	28	55.2	19	18	21	0	1	2	0	0
A146	1	80	0	12.77	1	30	32.2	45	24.3	17	17	0	0	2	0	0
A147	0	29	1	1210	3	20	26.7	25.2	25.8	320	603	1	0	2	1	1
A149	1	68	1	5.05	1	20	28.6	38.2	42	54	25.3	1	1	1	0	0
A150	1	53	1	1000	3	40	37.1	35.4	19	33	5.6	1	0	2	0	0
A151	1	78	1	2.4	1	60	65.4	11.9	666	716	8.4	0	0	2	0	0

## Sheet: clinical indicators test
name	gender	age	Glypican-3	AFP	AFP grade	AFP＞400	Ki67	APTT	ALB	total Bilirubin	ALT	AST	HBV	liver Cirrhosis	Differentiation	Satellite Nodule	MVI
A1	1	59	1	2.11	1	0	60	25.2	39	14	27	57	0	1	1	0	0
A3	1	39	1	30.48	2	0	20	31.5	42.5	7	26	20	1	1	2	0	0
A5	1	52	0	44.03	2	0	50	33	16	42	90	87	0	1	2	1	1
A9	1	77	1	168.42	2	0	70	26.8	33.1	11.45	37	34	0	1	2	1	0
A13	1	64	1	76.65	2	0	20	30	45.3	14.3	25	16	0	0	2	0	1
A18	1	60	1	574.58	3	1	20	41.4	31	96	116	191.1	0	0	2	0	0
A19	1	60	1	121.6	2	0	20	26.9	34.8	200	291	18.5	0	0	2	0	0
A24	1	43	1	1000	3	1	40	29.5	32.6	125	99	20.1	0	0	2	0	0
A28	1	49	1	4.25	1	0	10	29	39.6	175	61	19.1	0	1	2	0	0
A36	1	61	1	1000	3	1	10	27.1	30.5	34	110	14.1	0	0	2	0	0
A48	1	57	1	2.66	1	0	10	28	33.6	32	33	13.4	1	0	2	0	0
A49	1	52	1	64.34	2	0	20	27.1	29.9	59	98	28.5	0	1	2	0	0
A50	0	51	1	45.84	2	0	10	35.6	24.5	60	78	67.2	0	0	2	0	0
A52	1	49	1	11.13	1	0	20	30.1	35.1	171	273	24.3	0	0	2	0	0
A57	0	57	1	172.92	2	0	60	30.2	21	533	479	13.3	0	1	2	0	0
A63	1	66	1	15.34	1	0	10	32.8	38.4	213	184	215.3	0	0	2	0	0
A66	1	56	1	142.06	2	0	20	33.8	28.6	150	343	34.8	1	1	2	0	1
A76	1	48	0	15.97	1	0	60	25.1	25.2	35	56	35.1	0	0	2	0	0
A81	1	50	0	2.01	1	0	50	29	43.3	16	25	16.6	1	0	2	0	0
A82	1	58	1	23.74	2	0	7.5	30.8	36.3	96	75	21.1	0	1	2	0	1
A83	1	57	1	14.68	1	0	20	29.3	33.2	45	70	23.5	0	1	2	0	0
A87	1	62	1	94.3	2	0	20	31.3	44.5	29	28	16.5	0	1	2	0	2
A89	1	47	1	3.92	1	0	5	24.8	36.4	44	39	16.3	0	1	1	0	0
A90	1	66	1	11.74	1	0	60	22.3	39.1	19	24	10.5	1	1	2	0	0
A95	1	59	1	3.46	1	0	30	26.7	27.6	176	188	36.8	0	1	2	0	0
A96	1	55	0	3.78	1	0	10	34.5	34.3	86	192	28.8	0	0	2	0	0
A97	1	57	1	5.54	1	0	10	30.5	37.3	54	57	14.1	1	1	2	0	0
A101	1	53	1	1000	3	1	17.5	38.5	39.3	22.2	67	69	0	1	2	0	0
A105	1	49	1	22.12	2	0	20	44.3	37.4	30.7	58	52	0	1	2	0	1
A108	1	67	1	48.43	2	0	30	36	35.1	13.6	16	27	1	0	2	0	1
A110	1	56	0	5.04	1	0	90	33.1	33.4	14.1	19	32	0	0	1	0	0
A113	1	50	0	137.4	2	0	50	35.3	42.9	13.6	34	43	1	1	2	0	0
A115	0	65	0	2	1	0	60	33.9	43.4	18.9	11	21	0	0	2	0	0
A121	0	58	0	2	1	0	7.5	31.9	38.4	46	68	10.5	0	0	2	0	0
A122	1	61	1	500	3	1	5	28.8	43.1	23	51	21.5	0	1	2	0	0
A125	0	73	1	2000	3	1	20	29.1	41.3	16	24	15.8	0	0	2	0	0
A129	1	57	1	1902.3	3	1	60	38	46.8	51	36	17.2	1	1	2	0	2
A130	1	67	1	2.2	1	0	15	34.7	42.7	44	28	10.3	1	1	2	0	0
A134	1	69	1	3.19	1	0	20	40.9	41.9	36	43	22.3	0	0	2	0	0
A135	0	69	1	191.51	2	0	30	35	34.5	37	37	8.2	0	1	2	0	1
A138	1	60	1	284.77	2	0	35	30.6	44.9	221	241	57.7	0	1	2	0	1
A139	1	67	1	1000	3	1	15	42.7	27.4	39.6	529	490	0	0	2	0	0
A143	1	56	0	40	2	0	3.03	36.4	36	113.6	147	74	0	0	2	0	0
A148	1	64	1	24.89	2	0	50	29.9	21.2	166	220	31.2	0	1	2	0	1

## Sheet: train
name	gpc.3	AFP	hepaticcirrhosis	RadScore	Sphericity	HighGrayLevelEmphasis.3	HighGrayLevelRunEmphasis.2	Imc1.1	ClusterShade.2	LargeDependenceHighGrayLevelEmphasis.2	LowGrayLevelEmphasis.3	InverseVariance.2	Busyness.1	ClusterShade.4	MaximumProbability.2
A2	1	2	0	9.62	0.792204	-0.308254	-0.30775	-1.66963	0.0420424	-0.173753	-0.43943	-0.594611	0.230329	-0.19497	-0.336273
A4	0	2	0	1.19	-1.94679	-0.458772	-0.460594	1.10621	0.0247364	-0.704744	1.19047	0.957497	0.827456	-0.471676	5.07267
A6	1	2	1	9.73	1.15584	-0.409874	-0.410089	-1.97797	0.110258	-0.614695	1.31935	-0.904005	-0.478916	-0.267911	-0.193034
A7	0	2	0	7.57	-0.653664	-0.441724	-0.443044	-0.243431	0.0115437	-0.623438	1.21267	-0.751778	-0.432498	-0.404059	-0.277779
A8	1	1	0	9.24	0.289111	-0.43019	-0.431238	-1.20404	0.0292935	-0.598179	1.14529	-0.801749	-0.446773	-0.491645	-0.0347915
A10	1	3	0	7.3	-1.61571	0.784578	0.785936	-1.14588	0.00973254	0.396461	-0.78071	-0.588945	1.71182	1.4229	-0.396843
A11	1	2	0	6.65	-0.527574	-0.458985	-0.460681	1.42526	0.0240097	-0.686017	1.17177	0.71945	0.735757	-0.463961	4.48322
A12	1	2	0	7.68	0.455363	-0.443551	-0.445179	1.20288	0.0249335	-0.6894	1.17807	0.552914	1.92874	-0.469997	3.99469
A14	1	1	1	8.38	-0.296824	1.28667	1.28548	0.912747	3.38279	0.574431	-1.02535	-1.56457	-0.529188	0.841807	-0.415524
A15	1	1	0	6.05	0.737768	-0.166139	-0.166808	0.751052	-1.71508	0.183501	-0.892085	1.45789	-0.535661	-0.0184133	-0.21791
A16	1	1	0	5.41	0.964056	-0.114394	-0.115404	0.809454	0.0343828	4.93397	-1.07169	1.17197	-0.258753	0.000912536	-0.34861
A17	1	1	0	8.11	0.393595	-0.428444	-0.429583	-1.30172	-0.00593074	-0.334829	-0.436967	-2.03063	-0.488316	-0.379044	-0.324938
A20	1	1	1	8.7	0.730645	-0.138086	-0.139018	0.673115	0.107678	-0.207064	-0.764234	0.733296	-0.332186	0.449986	-0.285484
A21	1	3	1	9.41	1.17652	-0.417828	-0.419181	0.547349	0.0248539	-0.671802	1.1646	0.910265	-0.27101	-0.470219	0.624464
A22	1	2	1	4.81	-0.552603	0.902488	0.908555	0.476213	-0.958372	4.2273	-1.06169	0.592589	-0.530529	1.41281	-0.235058
A23	1	1	1	9.95	0.832121	-0.419602	-0.420443	-1.27408	0.0491449	-0.64522	1.39905	-0.721117	-0.523795	-0.419647	-0.119442
A25	1	3	0	9.68	0.462296	-0.31486	-0.315297	-1.27699	-0.0168302	-0.587065	1.16995	-0.644778	-0.176573	-0.372503	-0.33325
A26	1	3	1	7.03	0.857847	0.20539	0.204739	0.878981	0.00541049	0.402498	-0.909461	1.40218	0.196092	0.131208	-0.295488
A27	1	3	1	6	0.805695	0.643618	0.64353	0.29434	-0.140448	2.00937	-1.00794	1.18142	-0.502171	-0.187222	-0.298195
A29	1	1	1	8.65	0.840807	0.0096433	0.00879557	0.85978	-0.0920293	0.510389	-0.967625	1.09319	-0.490949	-0.32377	-0.357714
A30	1	1	1	9.3	0.725742	0.334651	0.339181	-1.05118	-0.255554	-0.590217	1.16868	-0.489488	-0.316991	0.00450661	-0.233465
A31	1	3	0	9.35	0.57971	-0.274106	-0.273859	0.537435	0.0124592	-0.0722083	-0.773237	1.01965	-0.523208	-0.434529	-0.191241
A32	1	1	1	7.08	0.849365	0.0608022	0.061337	0.775735	-0.176297	-0.0830701	-0.776786	1.35984	-0.492972	-0.0575576	-0.211491
A33	1	3	1	7.24	-1.68621	0.43455	0.436538	0.790239	1.69416	-0.0705836	-0.9541	-0.571546	-0.521879	-0.194537	-0.309524
A34	1	2	0	4.43	0.076872	1.01534	1.01379	0.827858	-0.0190207	2.02193	-1.02912	1.35723	0.0388971	-0.233729	-0.320472
A35	1	2	0	5.08	-2.10482	0.00904062	0.00788283	0.898271	0.0208133	0.300079	-0.908622	0.975891	1.6067	-0.466048	-0.287988
A37	0	3	1	5.89	-0.272126	-0.11848	-0.119768	1.02028	-0.132124	0.0728405	-0.902122	0.994283	0.923846	-0.322005	-0.321108
A38	1	1	0	8.43	1.29331	-0.250727	-0.25102	0.493895	0.10177	-0.125786	-0.771832	1.18013	-0.391781	-0.537758	-0.171576
A39	1	2	1	7.89	1.26338	-0.0996611	-0.100728	1.10581	-0.0766223	-0.0461602	-0.959279	-0.107562	-0.515402	0.689242	-0.34591
A40	1	1	1	9.57	0.716863	-0.398811	-0.398784	-1.26687	0.0525657	-0.580491	1.16919	-0.786101	-0.0839222	-0.467466	-0.284163
A41	0	1	0	4.11	1.33389	-0.126966	-0.127991	0.551549	0.0242168	-0.0527519	-0.781455	1.3506	-0.517134	-0.489431	-0.171662
A42	1	2	1	9.51	-0.741374	-0.254202	-0.254142	-1.47233	-0.0265413	-0.57701	1.17338	-0.389919	0.299859	-0.301304	-0.3842
A43	1	2	1	9.78	-0.659735	-0.411151	-0.410934	-2.36682	0.0364522	-0.622481	1.20313	-1.07098	-0.511135	-0.430048	0.106721
A44	1	1	0	9.19	-0.891752	-0.225153	-0.223475	-1.04712	0.0380756	-0.209452	-0.444447	-0.753816	-0.448517	0.853016	-0.307005
A45	1	1	1	6.59	0.696714	-0.402561	-0.403737	0.484273	0.0303912	-0.680608	1.14122	1.572	-0.477757	-0.493826	0.0159302
A46	1	1	1	8.65	1.11633	-0.0180342	-0.0195116	1.00939	0.0504626	0.0290247	-0.998699	-0.872949	-0.52362	-0.203589	-0.360554
A47	1	2	1	8.11	-0.277598	0.510543	0.50961	0.984016	-0.8048	0.175238	-1.02414	-1.24701	-0.522507	0.137139	-0.388933
A51	1	2	1	6.7	1.28339	0.338393	0.339018	0.763748	0.324366	0.242136	-0.904454	1.3745	-0.437782	0.381649	-0.274699
A53	0	1	0	7.73	0.321784	-0.368438	-0.369035	-0.874068	0.0168581	-0.615435	1.25437	-1.18903	-0.512573	-0.24733	-0.294914
A54	1	2	0	8.22	1.16163	1.75897	1.7594	0.394688	5.00514	0.0841828	-0.950315	0.234715	-0.532057	1.42052	-0.313921
A55	1	2	0	6.7	-1.79744	-0.164266	-0.164736	0.00058882	0.0313116	-0.23198	-0.442218	-0.713727	0.75749	-0.267122	-0.150344
A56	1	3	1	8.92	0.938352	-0.135903	-0.137376	0.578966	0.192465	-0.480848	-0.427985	1.12027	-0.482988	-0.0612352	-0.242351
A58	1	2	1	9.84	0.777458	-0.409278	-0.408807	-1.03029	0.0578364	-0.605292	1.27073	-0.89839	-0.462847	-0.100937	-0.147148
A59	1	2	0	9.24	-0.117997	0.248759	0.246957	0.865153	0.437605	0.011857	-0.960472	-0.533659	-0.530507	-0.171166	-0.323877
A60	0	1	0	7.41	1.0422	0.271931	0.271219	0.741076	0.608229	0.272855	-0.903485	0.82786	-0.504404	-0.371068	-0.309847
A61	1	1	0	9.35	0.529855	-0.412374	-0.412677	-0.861112	0.0534685	-0.616749	1.21845	-0.882938	-0.451444	-0.48962	-0.221542
A62	0	1	1	1.3	0.800495	0.0866881	0.0918154	0.757703	-2.71791	1.3344	-1.0258	-0.0884869	-0.535097	3.54095	-0.251842
A64	1	2	0	6.49	1.30627	-0.262205	-0.263494	0.900069	0.0244764	0.415635	-0.910054	1.47997	0.836924	-0.446126	-0.0998122
A65	1	2	0	9.89	-0.610736	-0.36272	-0.363063	-1.07638	0.0181702	-0.585583	1.18132	-0.806793	0.758413	-0.390173	-0.239794
A67	1	1	0	9.24	0.460147	-0.450566	-0.451595	-0.520057	0.0262167	-0.613166	1.22004	-0.903326	-0.407481	-0.466135	0.18721
A68	1	2	0	7.51	0.440155	0.984715	0.983865	0.819014	-0.434455	0.684949	-1.04162	-0.805486	-0.504974	-0.543253	-0.408587
A69	0	1	1	2.86	1.27879	0.112885	0.112282	1.03287	0.425595	3.20454	-1.06169	0.411315	-0.248611	-0.31401	-0.33213
A70	1	1	1	9.84	0.862912	-0.329827	-0.329299	-1.22919	0.0532243	-0.580866	1.20412	-0.517772	0.195272	-0.261794	-0.312854
A71	1	2	1	6.59	1.24771	1.91395	1.91487	0.93166	4.65392	0.321373	-1.03855	-2.94505	-0.534856	-0.344961	-0.228734
A72	1	1	1	9.95	0.751458	-0.375169	-0.374014	-1.3834	0.21588	-0.626754	1.34789	-0.0647439	-0.526762	-0.379575	-0.10217
A73	1	1	0	9.95	0.485751	-0.428796	-0.429069	-1.03112	0.0323314	-0.598129	1.19167	-0.851356	-0.194346	-0.400754	-0.1577
A74	1	1	0	8.59	0.57981	-0.399788	-0.399111	-0.599865	0.0447169	-0.283005	-0.437448	-1.4585	-0.16627	0.641968	0.0631227
A75	0	1	0	6.86	1.14262	-0.425688	-0.424585	-0.704406	0.0484678	0.183066	-0.778817	-1.35675	-0.530025	0.0443918	-0.172201
A77	0	1	0	7.14	0.615116	-0.431597	-0.433027	0.591852	0.0591135	-0.487549	-0.379105	-0.0474321	-0.50103	-0.453218	-0.272592
A78	1	1	0	8.05	1.18646	-0.446762	-0.447022	-0.765301	0.0290236	-0.642286	1.24294	-1.50981	-0.512828	-0.193511	0.0736157
A79	0	1	1	1.08	1.11302	-0.452522	-0.454187	1.381	0.0250104	-0.467872	-0.445788	1.4908	-0.289152	-0.472372	6.0007
A80	1	2	0	6	1.08519	-0.30371	-0.302844	0.800725	1.10123	1.23426	-1.00092	0.331013	-0.525195	1.53458	-0.203503
A84	1	1	1	1.84	-1.54379	0.301858	0.302255	0.581368	-4.69419	1.14498	-1.05231	-0.252237	-0.534328	1.56868	-0.375457
A85	0	1	0	1.84	-1.54379	0.301858	0.302255	0.581368	-4.69419	1.14498	-1.05231	-0.252237	-0.534328	1.56868	-0.375457
A86	1	2	0	9.62	0.520095	-0.391353	-0.39147	-0.916302	0.0281525	-0.605272	1.21178	-1.02109	-0.485139	-0.272065	-0.249135
A88	1	1	1	9.68	-0.773398	-0.379514	-0.37964	-0.691477	0.0681634	-0.675613	1.41498	-0.569637	-0.519816	-0.405381	-0.245567
A91	1	1	1	4.76	0.214657	-0.459198	-0.460644	1.41818	0.0251061	-0.686045	1.16109	0.797422	-0.136005	-0.472265	6.28284
A92	1	1	1	9.3	0.466174	-0.306744	-0.307609	0.958283	0.0313345	-0.0982152	-0.899138	0.808045	-0.447633	-0.470195	-0.182231
A93	1	1	1	9.19	0.592952	-0.451418	-0.452213	-1.63278	0.0245973	-0.599481	1.16641	-1.15228	-0.481955	-0.470451	0.878036
A94	1	1	1	8.92	1.00457	-0.421569	-0.419107	0.679199	0.177179	-0.524371	-0.408147	1.11741	-0.528516	-0.410096	-0.139486
A98	1	1	1	9.68	-0.903827	-0.441847	-0.442306	-1.87953	0.0279075	-0.588035	1.22685	-0.859166	-0.164802	-0.471247	0.416777
A99	1	1	1	7.41	0.382089	-0.149848	-0.150353	0.483789	0.0672856	-0.674081	1.20455	1.46482	-0.389871	0.440611	-0.0908283
A100	1	3	1	9.41	-0.414973	-0.452169	-0.453235	-1.56243	0.0242704	-0.58383	1.16879	-0.865008	0.513396	-0.459979	0.982666
A102	1	2	1	9.46	-0.895861	-0.364096	-0.363968	0.553778	0.0248523	-0.627742	1.18098	0.0301909	0.837465	-0.227337	-0.173359
A103	1	3	0	9.84	0.197229	-0.43732	-0.437532	-1.90683	0.0461147	-0.621274	1.29777	-0.807081	-0.504268	-0.382545	0.312479
A104	1	3	1	9.35	-0.513037	-0.436117	-0.436571	0.36598	0.0167818	-0.675445	1.33505	0.195522	-0.51897	-0.37858	-0.188665
A106	1	1	0	9.03	0.77015	-0.402636	-0.403856	0.604243	0.0226568	-0.657973	1.17068	0.857057	1.06306	-0.484116	-0.043255
A107	0	1	0	4.38	-0.76129	0.828159	0.832058	0.890476	0.304769	1.29811	-1.00579	0.805605	-0.488171	1.44049	-0.334788
A109	0	1	0	5.14	0.000790887	-0.150838	-0.151224	0.763893	0.0767289	0.355341	-0.908139	1.35893	0.773839	-0.288247	-0.258057
A111	0	1	0	1.19	0.465009	0.330714	0.33105	0.538931	-2.96352	2.50122	-1.02905	1.25555	-0.5013	-0.0854707	-0.261404
A112	1	2	1	5.95	-2.96017	0.074759	0.0747522	0.85704	-1.11505	0.200216	-0.90934	0.885464	-0.47908	-0.264075	-0.333043
A114	1	1	1	3.3	-1.87655	-0.363244	-0.364029	1.04902	0.0407733	-0.427927	-0.439878	1.50048	0.641557	-0.470763	0.086095
A116	0	1	0	1.03	-0.449763	0.849473	0.848175	0.655166	0.0172777	-0.373194	-0.443081	1.38994	5.02912	-0.425321	-0.101245
A117	1	1	0	9.24	0.604072	-0.362245	-0.363392	0.374151	0.0203165	-0.63511	1.20118	1.22113	-0.349781	-0.419729	0.665804
A118	1	2	0	8.59	-0.0167479	-0.0236198	-0.0234609	0.95995	1.0975	0.425753	-0.967818	-0.377794	-0.467783	2.18468	-0.279614
A119	1	2	0	8.81	0.576275	-0.112452	-0.113423	0.530354	0.0257204	-0.0883752	-0.775462	1.17159	0.938875	-0.255568	-0.320469
A120	1	3	0	10	-0.29286	-0.403046	-0.403764	0.19521	0.0243079	-0.606156	1.15692	-0.66992	0.131248	-0.46296	0.283183
A123	1	2	1	8.7	-1.221	-0.361858	-0.362884	0.738709	0.0249337	-0.689967	1.19132	1.15715	-0.502319	-0.458546	0.48244
A124	0	1	1	6.11	-1.26447	-0.398794	-0.398432	-0.950385	0.0630683	-0.612308	1.14299	-0.88422	-0.37611	-0.171169	-0.0342356
A126	0	1	0	0	-2.13471	-0.0394776	-0.0405949	0.682127	0.0388717	-0.455857	-0.438677	1.42176	2.03363	-0.33432	-0.289923
A127	1	3	1	9.73	-0.268451	-0.257391	-0.255078	-1.03319	0.0576152	-0.576282	1.16677	-0.890521	1.53196	0.0747412	-0.203112
A128	1	3	1	9.95	0.0203784	-0.360761	-0.359948	-0.509205	0.0485382	-0.586206	1.17733	-0.709392	0.748643	-0.0626713	-0.113946
A131	1	1	0	9.89	-1.02487	-0.297785	-0.293204	-1.38759	0.219728	-0.613344	1.18099	-0.874478	-0.455557	0.645478	-0.176417
A132	0	1	0	1.14	-1.88243	0.850024	0.847477	0.752614	0.0195486	-0.389544	-0.441151	1.24403	1.30379	-0.487621	0.0251211
A133	1	2	1	9.03	-0.433883	-0.280558	-0.276351	-0.220434	0.478688	-0.305532	-0.428958	-0.16799	-0.442451	1.69255	-0.30797
A136	1	3	1	9.41	-0.802389	-0.401711	-0.402095	-0.531052	0.015135	-0.592902	1.1795	-0.88816	1.52661	-0.207339	0.121252
A137	0	1	0	6	-1.33607	0.099023	0.100634	-0.812357	-0.192838	-0.240141	-0.444014	-0.787448	-0.394356	-0.0528574	-0.289185
A140	0	1	0	3.57	0.848941	-0.158675	-0.159619	0.83752	-0.26804	0.966265	-0.972188	1.42714	-0.48586	0.138336	-0.25752
A141	0	1	0	3.3	-1.24981	-0.0882336	-0.0872673	0.969425	0.21105	-0.205244	-0.77739	1.48913	-0.449592	0.0602237	-0.300198
A142	1	1	1	8.27	1.37458	-0.261548	-0.262698	0.517684	0.0411575	-0.0033505	-0.78121	0.873556	0.682848	-0.38767	-0.236509
A144	1	1	1	7.89	0.777111	0.0536246	0.0531207	0.570072	0.0122439	-0.655066	1.17643	1.26601	-0.243113	-0.189389	-0.214035
A145	1	1	1	9.14	-0.379959	0.403148	0.405721	0.916746	0.423505	0.253756	-0.904176	1.08748	-0.506019	-0.164596	-0.311976
A146	0	1	0	5.62	0.525887	-0.221488	-0.222327	0.846769	0.215886	0.838489	-0.971263	0.953717	-0.278293	-0.276684	-0.336778
A147	1	3	0	8.81	0.280005	0.610929	0.612125	0.955901	0.256315	0.677752	-0.967973	0.413244	-0.495101	0.630666	-0.265909
A149	1	1	1	8.76	-0.372163	0.00170089	0.00303008	-0.363194	-0.00901468	0.253196	-0.780976	-0.66459	-0.376407	-0.408644	0.157468
A150	1	3	0	9.08	-0.62086	-0.292412	-0.293578	0.46981	0.0234296	-0.642744	1.16217	1.14714	1.92922	-0.48086	0.207079
A151	1	1	0	6.59	-0.360396	-0.31802	-0.31931	1.0118	0.0237436	-0.413304	-0.441132	1.44391	-0.186196	-0.434102	0.186188

## Sheet: test
name	gpc.3	AFP	hepaticcirrhosis	RadScore	Sphericity	HighGrayLevelEmphasis.3	HighGrayLevelRunEmphasis.2	Imc1.1	ClusterShade.2	LargeDependenceHighGrayLevelEmphasis.2	LowGrayLevelEmphasis.3	InverseVariance.2	Busyness.1	ClusterShade.4	MaximumProbability.2
B1	1	1	1	5.04	0.576338	-0.342746	-0.342958	-0.34279	0.0259066	-0.584584	1.16452	-0.740953	5.37068	-0.297924	-0.302726
B2	1	2	1	9.46	1.08956	-0.411945	-0.411292	-0.729332	0.0420636	-0.598212	1.19651	-0.78262	-0.34134	-0.362805	-0.113902
B3	0	2	1	6.28	0.801626	-0.364521	-0.364042	-0.197221	0.0195886	-0.222417	-0.442313	-0.756557	2.33717	-0.229459	0.173814
B4	1	2	1	5.74	-1.42658	-0.0765703	-0.0774145	0.687871	0.0794775	0.209351	-0.905757	0.960749	-0.52787	0.0169083	-0.340412
B5	1	2	0	7.36	0.265675	-0.414412	-0.414893	-0.99997	0.0133647	-0.26844	-0.41857	-1.75249	-0.323071	-0.286365	-0.386726
B6	1	3	0	6.59	0.511869	0.158589	0.15728	1.03475	-0.144819	0.579053	-1.00419	0.159746	-0.105208	0.132667	-0.385463
B7	1	2	0	9.07	-0.993102	-0.389462	-0.389611	-2.34151	0.0119679	-0.598136	1.16847	-0.949279	-0.418507	1.01791	-0.305196
B8	1	3	0	9.84	1.14536	-0.374228	-0.3737	-1.56818	0.0695115	-0.60859	1.2104	-0.65984	-0.482635	-0.259449	-0.151045
B9	1	1	1	6.2	-0.0438551	-0.0824652	-0.0817806	1.05018	0.292185	0.0628864	-0.901939	0.435956	-0.532822	0.205236	-0.242766
B10	1	3	0	8.14	-1.04529	-0.267559	-0.266317	0.641596	0.102863	-0.201483	-0.775938	1.14971	-0.526196	-0.391822	-0.14516
B11	1	1	0	9.53	-0.0262109	-0.42932	-0.430158	-1.644	0.0231415	-0.611875	1.17543	-0.964671	-0.487435	-0.477856	-0.131132
B12	1	2	1	9.15	0.658923	-0.406933	-0.40795	-1.33468	0.00823987	-0.667358	1.33916	-1.08745	-0.521104	-0.59953	-0.23742
B13	1	2	0	4.19	0.897177	0.711914	0.710598	0.375581	-0.299431	0.899877	-0.970582	0.502362	0.118207	-0.314473	-0.398674
B14	1	1	0	8.68	1.20448	-0.119826	-0.120936	0.833614	0.21109	-0.0598922	-0.960271	-0.0825213	-0.46191	0.231141	-0.301349
B15	1	2	1	6.43	0.878419	1.71425	1.7203	0.780773	-0.846546	0.236776	-0.964914	-1.37259	-0.53483	1.80694	-0.313915
B16	1	1	0	9.38	1.20136	-0.401666	-0.401966	-0.214949	0.03223	-0.590126	1.17881	-0.699687	0.696734	-0.473598	-0.0500246
B17	1	2	1	4.19	0.99106	-0.108361	-0.107962	0.634042	-2.65005	-0.13172	-0.876267	-0.538578	-0.532652	1.4996	-0.342328
B18	0	1	0	4.42	0.405394	-0.0811174	-0.0822694	0.544466	-0.0127668	1.9515	-1.02899	0.470533	-0.433261	0.239432	-0.344332
B19	0	1	0	2.4	-1.54348	-0.385225	-0.38586	-0.220253	0.0267855	-0.597077	1.17288	-0.797346	3.7621	-0.352239	-0.174401
B20	1	2	1	5.66	0.950769	-0.428828	-0.429287	-0.389804	0.292119	-0.594667	0.902369	-1.65132	-0.531441	-0.52616	-0.178196
B21	1	1	1	6.43	-0.598369	0.529958	0.530938	0.686807	-0.0593968	0.345133	-0.906068	1.08679	-0.518519	3.63533	-0.139538
B22	1	2	1	9.61	-0.773398	-0.379514	-0.37964	-0.691477	0.0681634	-0.675613	1.41498	-0.569637	-0.519816	-0.405381	-0.245567
B23	1	1	1	7.98	-0.215266	0.0439599	0.0436687	0.975093	-0.470938	0.16833	-1.0006	-0.499451	-0.523465	0.547993	-0.359202
B24	1	1	1	5.81	-0.922953	-0.194081	-0.193872	-1.20282	-0.0168638	-0.183752	-0.441851	-0.709368	2.23113	-0.0762829	-0.362198
B25	1	1	1	4.34	-0.532402	-0.312249	-0.313474	0.796808	-0.0225999	-0.323942	-0.750884	1.58393	-0.420428	-0.455095	-0.203029
B26	0	1	0	3.1	-0.402149	0.917354	0.916684	0.78501	-2.00306	1.02609	-1.00599	-0.41798	-0.527033	0.25785	-0.349018
B27	1	1	1	9.92	0.635293	-0.401155	-0.402133	-2.05437	0.052656	-0.619591	1.17297	-1.02273	-0.497427	-0.429643	-0.197806
B28	1	3	1	1.78	-0.698599	0.510606	0.510332	0.979018	0.059534	2.07689	-1.02956	0.999966	-0.503561	1.96159	-0.301391
B29	1	2	1	7.36	0.75599	-0.253846	-0.252662	-2.06738	0.0342615	-0.092756	-0.44237	-1.53624	1.59897	-1.33189	-0.390504
B30	1	2	0	4.34	-2.09129	-0.0652931	-0.0658674	0.949327	0.122866	-0.259518	-0.772051	0.687281	-0.505707	-0.215452	-0.293797
B31	0	1	0	5.81	-0.462495	0.913001	0.917168	0.861852	0.990244	-0.243627	-0.753972	0.486021	-0.530873	-0.412524	-0.308234
B32	0	2	1	0	-3.06135	10.7665	10.7633	0.770571	1.56489	5.78621	-1.06749	0.968689	-0.484735	0.0184916	-0.324106
B33	0	1	0	3.49	-1.4096	-0.0234963	-0.0253873	0.935844	-1.1323	-0.494389	-0.747486	-0.853308	-0.536262	0.596706	-0.247907
B34	0	1	0	3.49	-2.15139	0.329839	0.336416	-1.17766	0.00490502	-0.248799	-0.430867	0.251505	-0.488587	-4.70354	-0.402438
B35	1	3	1	5.58	-0.714273	-0.317976	-0.318603	-0.726665	0.0271668	-0.205275	-0.442642	-0.89185	3.45834	-0.376023	-0.195459
B36	1	3	0	9.61	0.240257	-0.414448	-0.414148	-0.823654	0.0207862	-0.600621	1.17861	-0.639695	-0.311048	-0.309223	0.244935
B37	1	3	1	7.44	-0.404734	0.0722081	0.0742876	-1.73947	-0.0441157	-0.240908	-0.433607	-0.0406804	-0.360634	-0.507583	-0.326582
B38	1	1	1	8.99	-0.758296	-0.345009	-0.345348	-1.33651	0.100794	-0.611861	1.17708	-0.949989	-0.443667	-0.386294	-0.250602
B39	1	1	0	10	-0.600605	-0.371339	-0.371616	-1.46186	0.105018	-0.664132	1.22571	-0.401304	-0.52283	-0.36682	-0.235369
B40	1	2	1	9.53	-0.224175	-0.391349	-0.390907	-0.978235	0.0295859	-0.618481	1.2335	-0.960512	-0.496259	-0.187445	-0.201865
B41	1	2	1	8.84	-0.39173	-0.331659	-0.329902	-0.916222	0.0827204	-0.245944	-0.43551	-0.630374	-0.303156	-0.255526	-0.307794
B42	1	3	0	6.9	0.983978	0.109387	0.10966	0.73812	1.09774	0.0776215	-0.896702	-0.642029	-0.214713	6.9027	-0.354146
B43	0	2	0	3.49	1.35823	-0.158346	-0.159358	0.760448	-0.160371	0.384674	-0.90858	1.23677	-0.482809	-0.287272	-0.0355536
B44	1	2	1	8.53	-1.1873	-0.413305	-0.4134	-1.17755	-0.0318348	-0.614479	1.22103	-0.857025	-0.395907	-0.111457	-0.14127
